# Supplementary material
Source: PubMed Central journal article supplement (PMC5233592)
Supplement: NIHMS832534-supplement-5.pdf [file NIHMS832534-supplement-5.pdf]

Supplemental Figures and Legends

Figure S1

A

O-Linked:

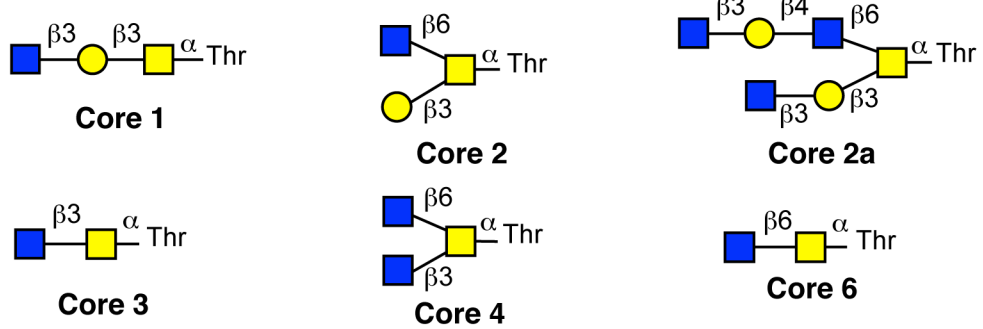

N-Linked:

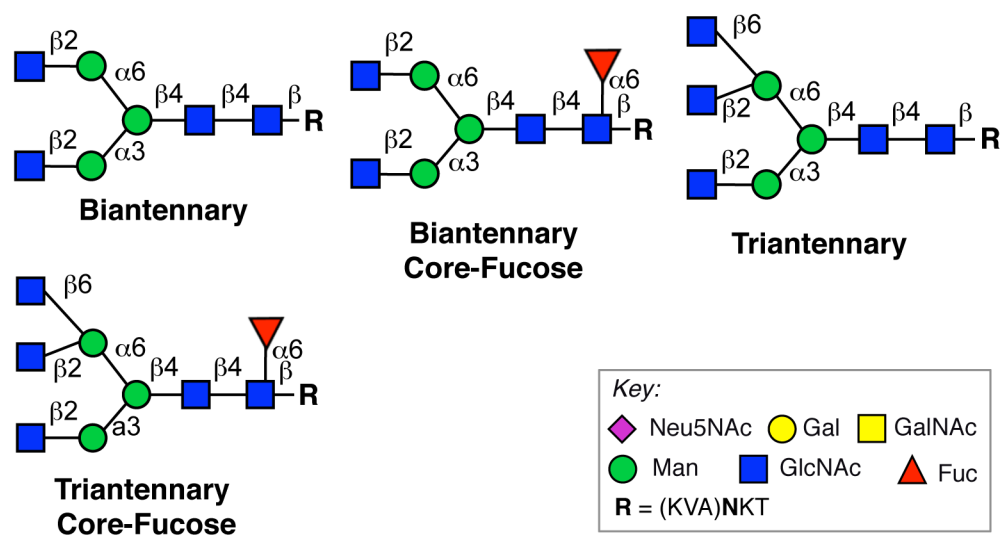

B

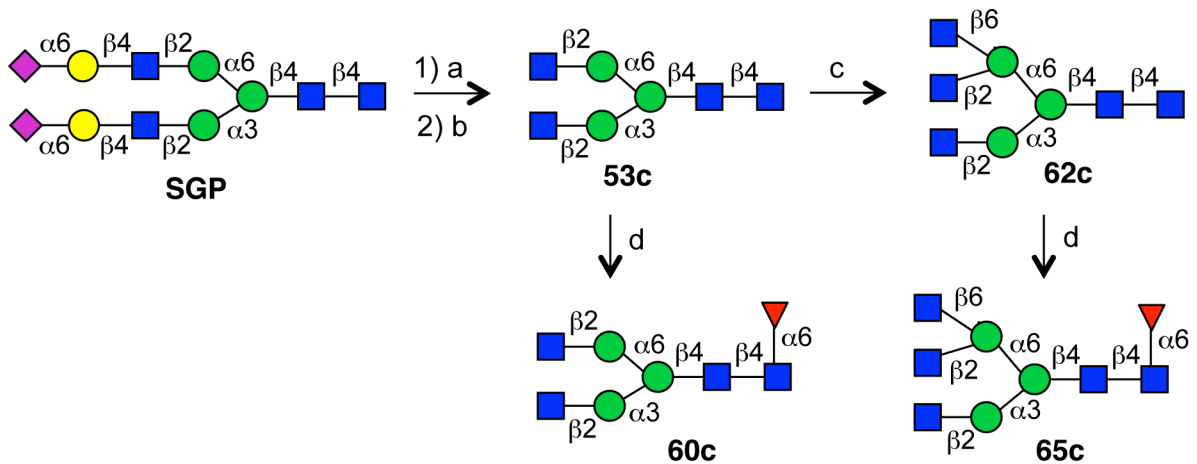

Conditions and reagents:

- a) Neuraminidase from *Arthrobacter ureafaciens*. b)  $\beta$ -Galactosidase from *Aspergillus oryzae*.  
 c) UDP-GlcNAc, GnT-V; d) GDP-Fuc, FUT8.

Figure S1. O- and N-linked Glycan Core Structures. Related to Figure 1.

A) O- and N-linked core structures used in this study. GlcNAc residues at the nonreducing end can be extended with poly-LacNAc chains. B) Enzymatic synthesis of N-linked glycan core structures from N-linked glycan **SGP** obtained from egg-yolk.

Figure S2

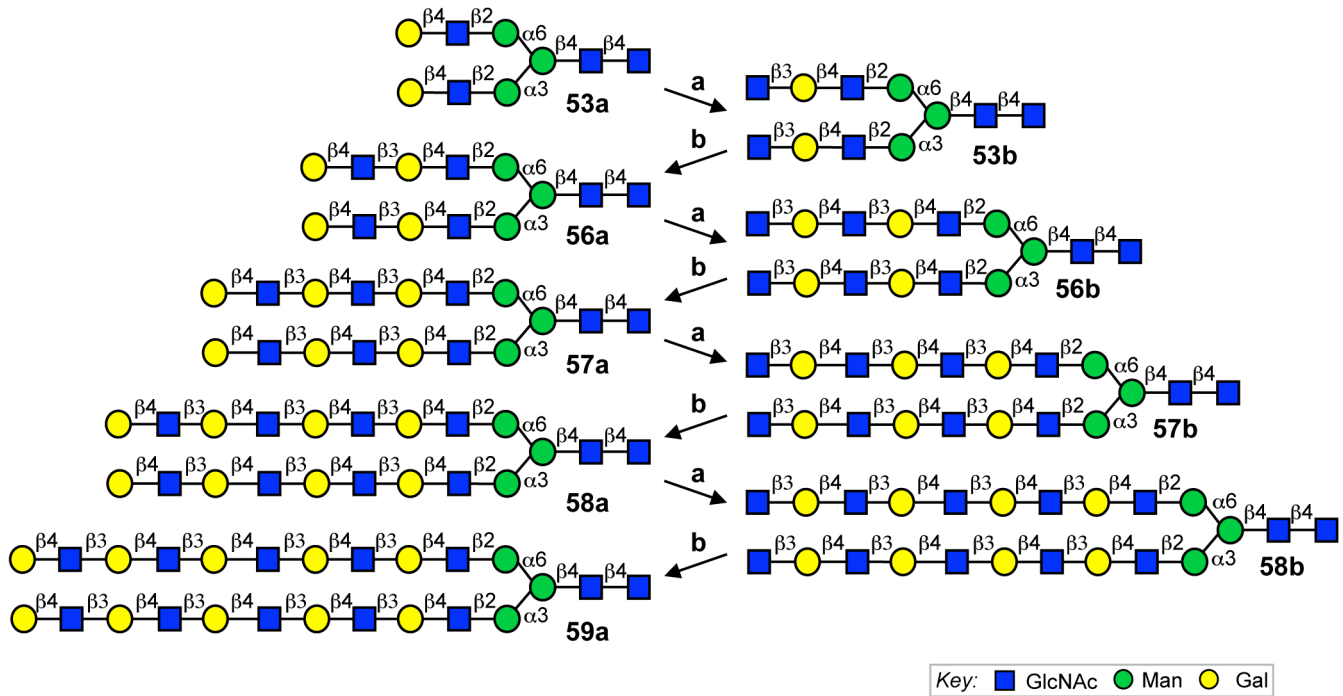

**Figure S2. Example of the Extension of poly-LacNAc Chains on Biantennary N-linked Glycan Core Structures. Related to Figure 1.**

A penta-LacNAc chain was elongated stepwise on a biantennary N-linked glycan using an iterative enzymatic synthesis by HP  $\beta$ 1-3GnT and mammalian  $\beta$ 1-4GalT-1. The galactoside intermediates could be further sialylated to form either  $\alpha$ 2-3 or  $\alpha$ 2-6 sialosides. Conditions and reagents: a, HP  $\beta$ 1-3GnT, UDP-GlcNAc; b, GalT-1, UDP-Gal.

Figure S3

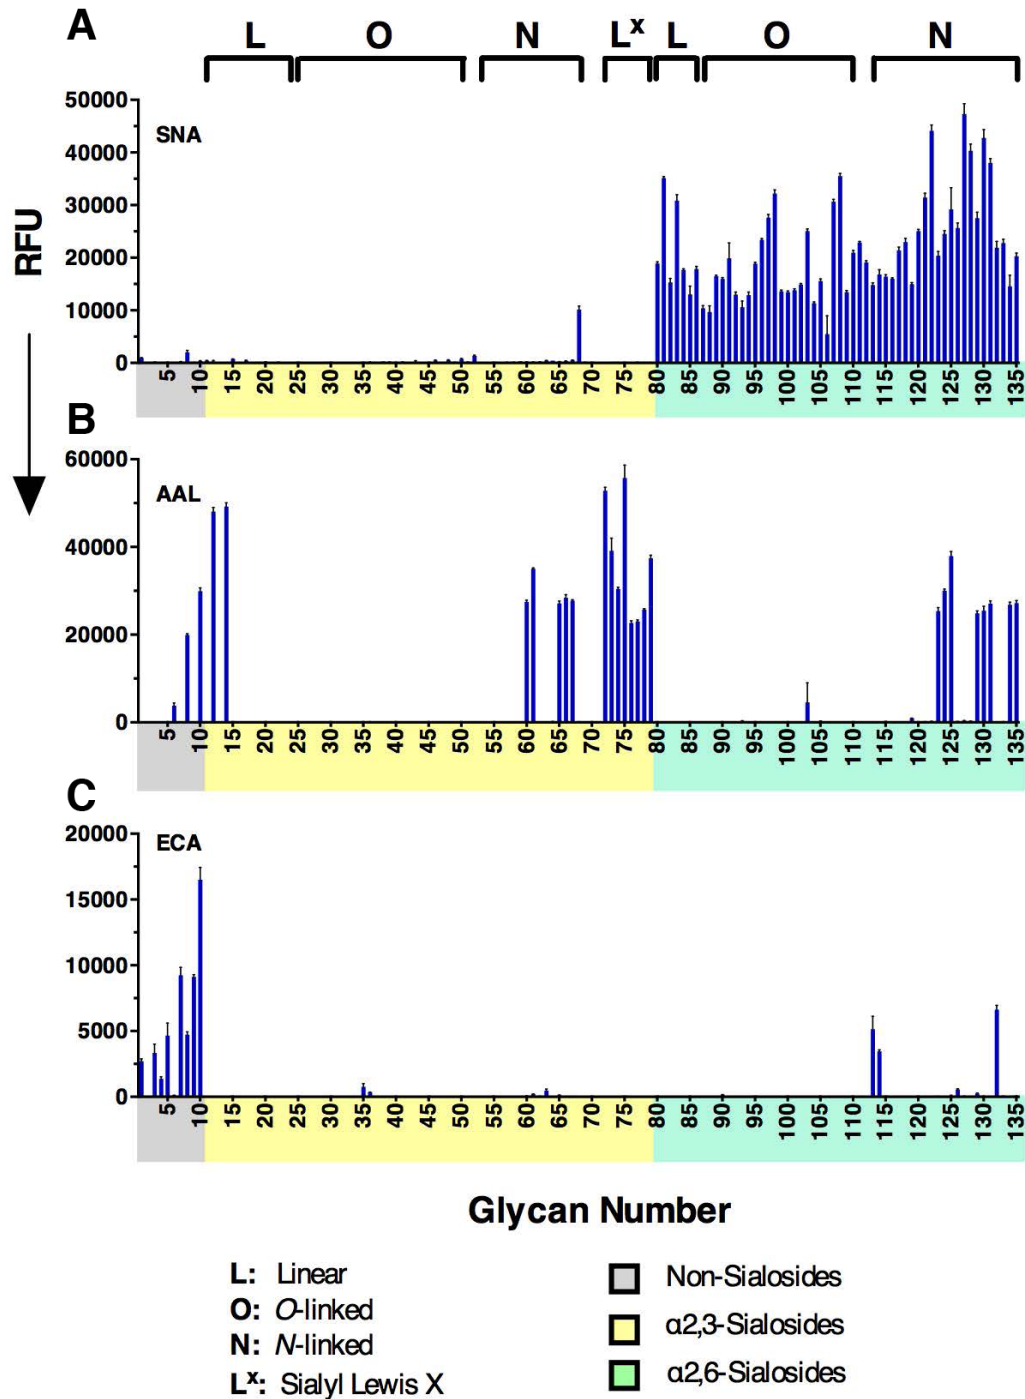

**Figure S3. Binding of Plant Lectins to the Sialoside Microarray. Related to Figure 1B.**

Plant lectins of defined specificity were used to confirm the fidelity of structures on the microarray. Signals are the mean and standard error calculated for six independent replicates on the array after removal of the highest and lowest signals. A) SNA detects all glycans containing the  $\alpha$ 2-6 sialic acid epitope (**80-135**). B) AAL was used to detect fucose residues either in N-linked Core or Lewis X structures. C) ECA recognizes terminal galactose residues (e.g. control glycans **1-10**), and did not bind to newly synthesized sialosides except for reference compounds **113,114** and **132** with terminal galactose. These controls demonstrate that enzymatic sialylation was complete and all terminal galactose residues were efficiently capped.

Figure S4

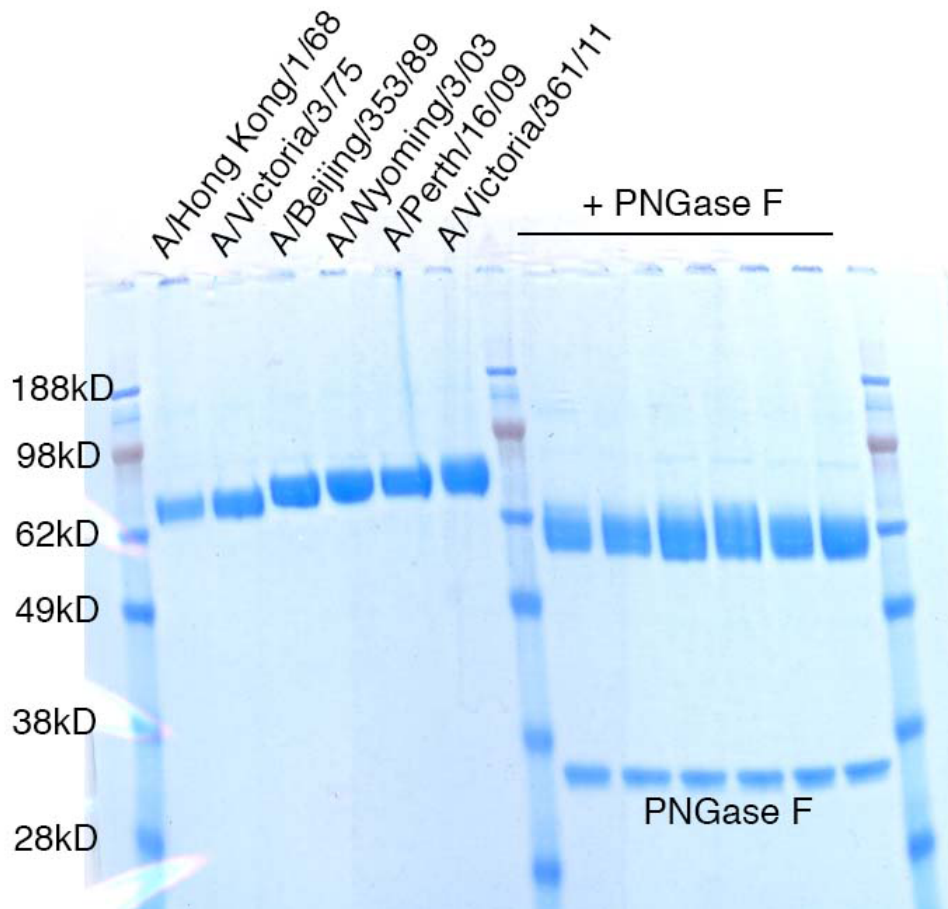

**Figure S4. SDS-PAGE Analysis of N-linked Glycosylation of Recombinant H3 HAs from 1968 to 2011. Related to Figure 2.**

Analysis was performed by incubation of various recombinant HAs with or without PNGase F at 37 °C for 60 mins, followed by non-reducing gel electrophoresis and staining with Coomassie blue. On the right, the lower band represents PNGase F, and the upper band is deglycosylated HA. M.W. standards are shown on the left, center and outer lanes.

Figure S5

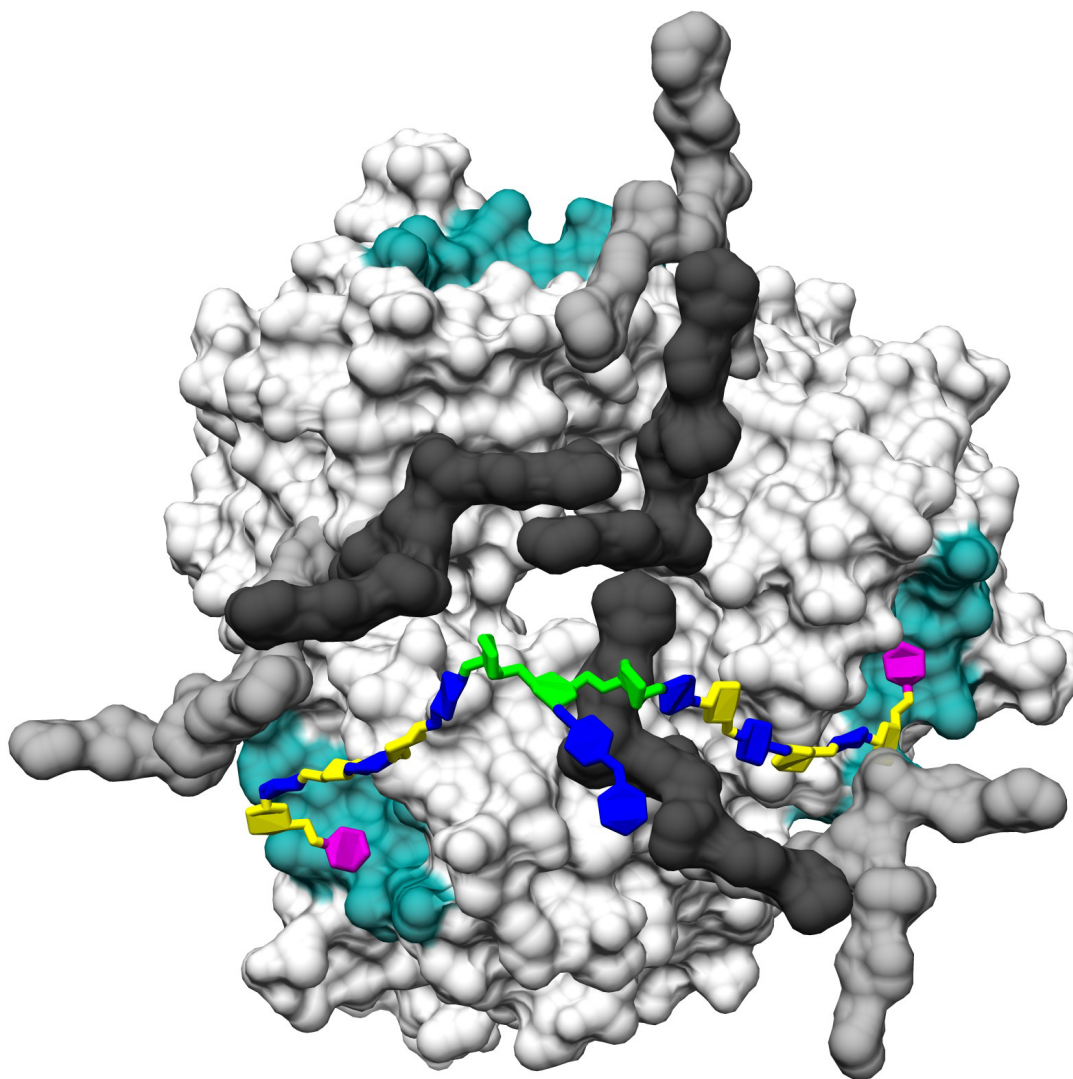

**Figure S5. Bi-dentate Docking of an Extended  $\alpha$ 2-6 Sialylated N-linked Glycan to an H3 Hemagglutinin. Related to Figure 7.**

A tri-LacNAc biantennary sialoside **120** (in blue/green/yellow/purple) was grafted onto an H3 HA trimer (Victoria/11) with asialo-biantennary N-linked glycans proximal to the RBS modeled at glycosylation sites N165 and N246 (dark and light grey, respectively) on each protomer. The view is looking down on the top of the HA along the threefold axis of the trimer. The biantennary sialoside is able to span two of the three RBS (cyan) of the trimer.

Figure S6

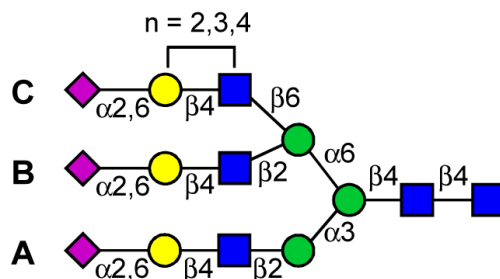

| Distance between terminal sialic acids (Å) |      |     |     |     |     |     |
|--------------------------------------------|------|-----|-----|-----|-----|-----|
| Sialosides                                 | Arms |     |     |     |     |     |
|                                            | A-B  |     | B-C |     | A-C |     |
|                                            | Min  | Max | Min | Max | Min | Max |
| <b>126</b><br>(n = 2)                      | 35   | 46  | 36  | 44  | 19  | 35  |
| <b>127</b><br>(n = 3)                      | 33   | 66  | 48  | 58  | 20  | 58  |
| <b>128</b><br>(n = 4)                      | 51   | 82  | 60  | 67  | 31  | 75  |

**Figure S6. Distance between Terminal Sialic Acids of Triantennary N-linked  $\alpha$ 2-6 Sialosides. Related to Figure 7.**

Distances between the C2 atoms in the sialic acids in each arm of triantennary N-glycans with different numbers of LacNAc extensions as calculated from molecular dynamics simulations. The triLacNAc extension is the minimum unit that can span the distance between the two receptor binding sites in the HA trimer (45 Å).

Figure S7

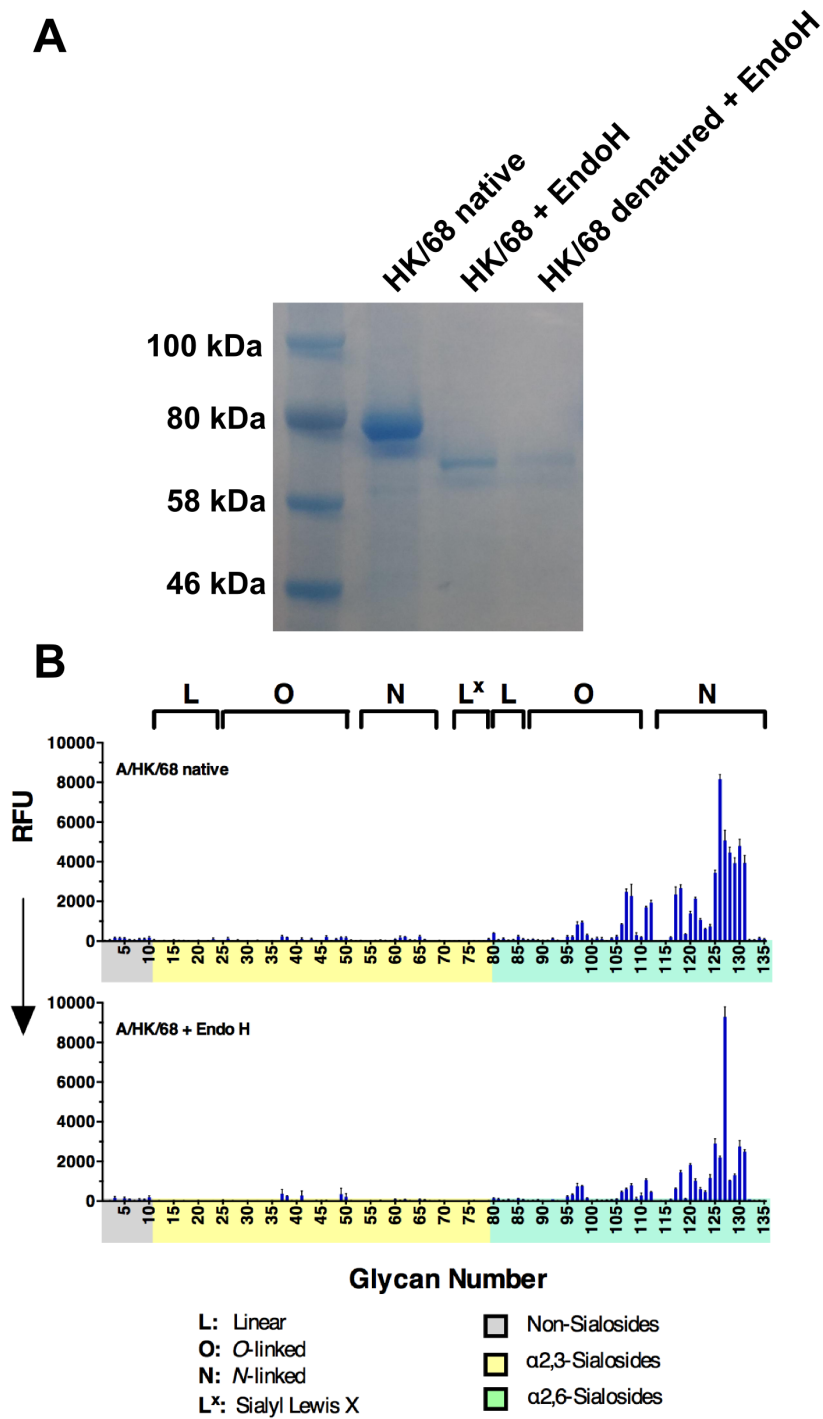

**Figure S7. HA glycosylation has no effect on receptor binding in HK/68. Related to Figure 5 and 6.**

(A) HK/68 HA was expressed in 293S (GnT1<sup>-/-</sup>) cells with exclusively high-mannose N-glycans (left) and natively deglycosylated using Endo H (center). As a control, a small HA sample was denatured prior to Endo H treatment (right) to ensure complete deglycosylation of the natively folded protein. (B) Receptor specificities of glycosylated (upper panel) and Endo H-treated (lower panel) HK/68 HA were analyzed by glycan microarray.

## Supplemental Table Legends

### **Table S1. Full Glycan List of Sialoside Microarray Used in this Study. Related to Figure 1, 2, 3, 4, 6, S3 and S7.**

The array contained 135 glycans, including 75 sialosides reported here, and 50 sialosides and non-sialoside glycans reported previously (Tzarum et al., 2015; Wang et al., 2013).



**Table S2. Potential N-linked Glycosylation Sites on H3 HAs during H3N2 Virus Antigenic Drift. Related to Figure 2.** Glycosylation sites on the H3 HA have increased since 1963. In our study, six HAs from 1968 to 2011 were cloned (see red arrow). HA residue numbering as for A/Hong Kong/1/1968.

**Table S2**

| HA   | Subtype | Strain                | Year | Glycan (all HAs have conserved glycans at HA1 22, 38, 165, 285; HA2 154) |    |     |     |     |     |     |    |   |
|------|---------|-----------------------|------|--------------------------------------------------------------------------|----|-----|-----|-----|-----|-----|----|---|
|      |         |                       |      | 81                                                                       | 63 | 126 | 246 | 122 | 133 | 144 | 45 |   |
| 1    | H3N8    | A/duck/Ukraine/1/1963 | 1963 | +                                                                        | -  | -   | -   | -   | -   | -   | -  | - |
| → 2  | H3N2    | A/Hong Kong/1/1968    | 1968 | +                                                                        | -  | -   | -   | -   | -   | -   | -  | - |
| → 3  | H3N2    | A/Victoria/3/1975     | 1975 | -                                                                        | +  | +   | -   | -   | -   | -   | -  | - |
| 4    | H3N2    | A/Bangkok/1/1979      | 1979 | -                                                                        | +  | +   | -   | -   | -   | -   | -  | - |
| 5    | H3N2    | A/Leningrad/360/1986  | 1986 | -                                                                        | +  | +   | +   | -   | -   | -   | -  | - |
| → 6  | H3N2    | A/Beijing/353/1989    | 1989 | -                                                                        | +  | +   | +   | -   | -   | -   | -  | - |
| 7    | H3N2    | A/Shangdong/9/1993    | 1993 | -                                                                        | +  | +   | +   | -   | -   | -   | -  | - |
| 8    | H3N2    | A/Panama/2007/1999    | 1999 | -                                                                        | +  | +   | +   | +   | +   | +   | +  | - |
| 9    | H3N2    | A/Moscow/10/1999      | 1999 | -                                                                        | +  | +   | +   | +   | +   | -   | -  | - |
| → 10 | H3N2    | A/Wyoming/3/2003      | 2003 | -                                                                        | +  | +   | +   | +   | +   | +   | +  | - |
| 11   | H3N2    | A/Brisbane/10/2007    | 2007 | -                                                                        | +  | +   | +   | +   | +   | +   | +  | - |
| → 12 | H3N2    | A/Perth/16/2009       | 2009 | -                                                                        | +  | +   | +   | +   | +   | -   | -  | - |
| → 13 | H3N2    | A/Victoria/361/2011   | 2011 | -                                                                        | +  | +   | +   | +   | +   | +   | +  | + |

- no PNG  
+ PNG  
→ Candidate HA to test

## Supplemental Movie Legends

**Movie S1. Molecular Dynamics Simulation of DiLacNAc-Bidendate with Cal04 HA. Related to Figure 7.**  
Glycan is an extended  $\alpha$ 2-6 Sialylated N-linked glycan related to **118** in Table S1.

**Movie S2. Molecular Dynamics Simulation of TriLacNAc-Bidendate with Cal04 HA. Related to Figure 7.**  
Glycan is an extended  $\alpha$ 2-6 Sialylated N-linked glycan related to **120** in Table S1.

**Movie S3. Molecular Dynamics Simulation of TetraLacNAc-Bidendate with Cal04 HA. Related to Figure 7.**  
Glycan is an extended  $\alpha$ 2-6 Sialylated N-linked glycan related to **121** in Table S1.

**Movie S4. Molecular Dynamics Simulation of PentaLacNAc-Bidendate with Cal04 HA. Related to Figure 7.**  
Glycan is an extended  $\alpha$ 2-6 Sialylated N-linked glycan related to **122** in Table S1.

## Supplemental Experimental Procedures

### 1. Materials and Methods for Glycan Synthesis

The recombinant enzymes, *Helicobacter pylori*  $\beta$ 1-3-*N*-acetylglucosaminyltransferase ( $\beta$ 3GlcNAcT), rat ST3Gal-III, and human ST6Gal-I were produced and purified as described previously (Nycholat et al., 2012; Nycholat et al., 2013; Peng et al., 2012). *N*-acetylglucosaminyltransferase V (GnT-V) was kindly donated from Dr. Michael Pierce laboratory (CCRC, University of Georgia at Athens). Mammalian  $\alpha$ 1-6-fucosyltransferase (FUT8) was obtained from the Dr. Naoyuki Taniguchi's laboratory (Riken Advanced Science Institute, Japan) and expressed as previously described (Ihara et al., 2006). Mammalian  $\beta$ 1,4-galactosyltransferase from bovine milk (GalT-1) and  $\beta$ -galactosidase (from *Aspergillus oryzae*) were purchased from Sigma-Aldrich. Uridine 5'-diphospho-galactose (UDP-Gal) was purchased from Calbiochem EMD Millipore. Uridine 5'-diphospho-*N*-acetylglucosamine (UDP-GlcNAc) and guanidine-5-diphospho-fucose (GDP-Fuc) were a gift from Tokyo Research Laboratories, Kyowa Hakko Kogyo Co. Ltd. Neuraminidase (sialidase from *Arthrobacter ureafaciens*; 1 U/100  $\mu$ L) was purchased from Roche Applied Science (Indianapolis, IN, USA). Mouse anti-Strep2 was purchased from AbCam. Streptavidin-Alexa Fluor488 and anti-mouse-IgG Alexa Fluor488 were purchased from Invitrogen. Biotinylated SNA, AAL and ECL were purchased from VectorLab. Starting materials for *O*-linked glycans were prepared as reported previously (Peng et al., 2012). All chemicals were obtained from commercial suppliers and used as received unless otherwise noted. Whatman TLC plate coated with silica gel 60-F<sub>254</sub> was purchased from VWR.

All enzymatic reactions were performed in an aqueous, buffered system with the appropriate pH for each enzyme. Water was purified by NanoPure Infinity Ultrapure water system (Barnstead). Reactions were monitored by mass spectrometry analysis and thin layer chromatography (TLC). TLCs were developed with appropriate eluents (*i*PrOH:NH<sub>4</sub>OH:H<sub>2</sub>O, 4:3:1 or 5:2:1, v:v:v), and the spots were visualized by UV light or by treatment with 10% sulfuric acid in ethanol followed by heating. Gel filtration chromatography was performed with a column (113 cm  $\times$  0.7 cm) or (42 cm  $\times$  0.5 cm) packed with Sephadex<sup>TM</sup> G-25 superfine (GE Healthcare), eluted with 0.1 M NH<sub>4</sub>HCO<sub>3</sub> (aq). <sup>1</sup>H NMR spectra were recorded on Bruker DRX-600 (600 MHz) instruments at 25 °C are reported in parts per million ( $\delta$ ) relative to HOD (4.79 ppm, D<sub>2</sub>O). Coupling constants (*J*) are reported in Hertz. <sup>13</sup>C NMR spectra were recorded on Bruker DRX-600 (150 MHz) instruments at 25 °C. NMR data were processed with Mnova software. MS data of asialosides were recorded with an Applied Biosystems DE MALDI-TOF using dihydroxybenzoic acid as the matrix. MS data of sialosides were recorded with an Applied Biosystems SCIEX MALDI TOF/TOF 5800 after permethylation. All of the sialosides were permethylated before MS analysis unless otherwise noted.

### 2. Array Quality Control by Plant Lectins

Lectins (10  $\mu$ g/ml) and Streptavidin-AlexaFluor were pre-mixed for 15 min on ice at 10  $\mu$ g/ml and 2  $\mu$ g/ml, respectively in PBS + 0.05% Tween-20. The lectin-Streptavidin complex was loaded on the array surface and incubated in a humidified chamber for 1 hr. Slides were rinsed successively with PBS-T, PBS and deionized H<sub>2</sub>O. Washed arrays were dried by centrifugation and immediately scanned using an Innoscan 1100AL (Innopsys) confocal microarray scanner. Fluorescent signal intensity was measured using the Mapix software package (Innopsys) and analysed using Prism (Graphpad Software). Signals are expressed as relative fluorescence units (RFU) with the mean and standard error calculated from six independent replicates on the array.

### 3. Molecular Modeling and Simulation Method

*Simulation details* - All simulations were performed with the CUDA implementation of PMEMD (Gotz et al., 2012; Salomon-Ferrer et al., 2013) in the Amber14 software suite (Case et al., 2014a). The carbohydrate was modeled using the GLYCAM06h force field (Kirschner et al., 2008), while the Amber14SB force field (Case et al., 2014b) was employed for the protein. A Berendsen barostat with a time constant of 1 ps was employed for pressure regulation, while a Langevin thermostat with a collision frequency of 2 ps<sup>-1</sup> was used for temperature regulation. A nonbonded interaction cutoff of 8 Å was employed. Long-range electrostatics were treated with the particle-mesh Ewald (PME) method (Darden et al., 1993). Covalent bonds involving hydrogen were constrained with the SHAKE algorithm allowing a time step of 2 fs (Ryckaert et al., 1977).

**3D structure generation** - Initial conformations for biantennary  $\alpha$ 2-6 di-, tri-, tetra- and penta-LacNAc glycans were built and energy minimized using GLYCAM-Web ([www.glycam.org](http://www.glycam.org)). Each structure was placed in a periodic box of TIP5P (Mahoney and Jorgensen, 2000) water molecules with an 8 Å buffer between the glycan and the box edge using tleap in AmberTools15 (Case et al., 2014).

The trimeric HA1 domains of H1 Cal/04/09 and H3 Victoria/11 were generated from PDB codes 3UBE and 4O5N, respectively. After alignment, residues before H64 and after Y83 of the stalk region, as well as residues before Q57 and after S270, were removed to reduce computational time. The three NeuAc $\alpha$ 2-6Gal disaccharides in the H1 Cal/04/09 structure were added to the H3 Vic/11 HA1 domain after alignment. Biantennary, asialo-monoLacNAc glycans were generated at N165 and N246 of the Vic/11 structure. This structure was then placed in a periodic box of TIP5P (Mahoney and Jorgensen, 2000) water molecules with an 8 Å buffer between the glycan and the box edge using tleap (Case et al., 2014).

**Biantennary co-complexes** - Each N-glycan receptor was grafted into an HA binding site by superimposing the NeuAc $\alpha$ 2-6Gal binding motif of one branch onto the crystal structure of the ligand bound to the HA (PDB codes 3UBE and 4O5N). The reported grafting algorithm (Grant et al., 2014; Tessier et al., 2013) was adapted to rotate the glycosidic linkages within normal bounds (Nivedha et al., 2014), while monitoring the distance between the binding motif on the other arm of the glycan and the second HA binding site. The linkages were adjusted in series, beginning from the bound motif. For Cal/04/09, a single optimal structure was selected for each glycan based on the relative orientation and proximity of the second binding motif to the target HA binding site. This structure was subject to refinement via energy minimization and molecular dynamics simulation. The results were independent of whether the 3-arm or the 6-arm of the glycan was grafted onto the bound NeuAc $\alpha$ 2-6Gal motif.

For Vic/11, 1,000 snapshots were extracted at regular intervals from the MD simulation. The same procedure as for Cal/04/09 was repeated to assess whether a Tri-LacNAc biantennary receptor glycan could form a bidentate co-complex while avoiding atomic overlaps with the N165 and N246 glycans.

**Refinement of the bidentate co-complexes** - A 10 ns production simulation was performed at 300 K (nPT). Cartesian restraints (5 kcal/mol/Å<sup>2</sup>) were placed on protein C $\alpha$  atoms. Solvation was treated with the generalized Born approximation (igb=2). During the final 200 ps of equilibration, the NeuAc $\alpha$ 2-6Gal motif was guided into the binding site by introducing distance restraints (see Supplementary Information S1 and Supplementary Table T1 for details). The stability of the new structure was assessed by continuing MD simulation for 10 ns without restraints.

**Energy minimization and equilibration** - Energy minimization was performed for 20,000 steps (10,000 steepest descent, followed by 10,000 conjugate gradient). The system was then heated from 5 K to 300 K over 100 ps followed by 300 ps of structural equilibration.

**Glycosylated H3 HA1 domain simulations** - A production simulation of 100 ns was performed for the N165 and N246 glycosylated H3 HA1 domain. Cartesian restraints (5 kcal/mol/Å<sup>2</sup>) were employed on the C $\alpha$  atoms of the terminal of the HA1 domain.

#### **4. Virus Infection Protocol**

MDCK cells were grown in MEM (Minimal Essential Media, Gibco) supplemented with 10% FBS (Fetal Bovine Serum), 1x P/S (Pencillin/Streptomycin mix) and 1x L-Gln and used for experiments when monolayers reach 100% confluency in 6-well tissue culture trays (approximately 1 x 10<sup>6</sup> cells per well). After washing twice with warm PBS (maintained throughout all steps unless otherwise indicated), MDCK monolayers were digested with 50 units (per well) of *C. perfringens* neuraminidase (CPN; New England BioLabs) in 0.5 ml PBS, pH 6.5, 0.1% BSA (Bovine Serum Albumin), 5 mM CaCl<sub>2</sub> for 3 hours at 37°C. Cells were then incubated with 3  $\mu$ M (final) glycolipid (6SLN<sub>1,3</sub>-L/N-lipid) in 0.5 ml MEM media (0.1% BSA, 1x P/S, 1x L-Gln) for 20 min at 37°C. Following exogenous receptor treatment, cells were incubated with 50 pfu of Vic/11 virus in 0.5ml MEM media for 10 min at 37°C. Finally, MDCK monolayers were washed three times with PBS and incubated with 2 ml MEM media supplemented with 1  $\mu$ g ml<sup>-1</sup> TPCK-treated (L-1-Tosylamide-2-Phenylethyl Chloromethyl Ketone) trypsin for 48 hours at 37°C. Control monolayers were treated identically and incubated with media or buffer minus glycolipid, neuraminidase or virus.

After 48 hours, media samples from both control and treated cells were harvested and viral titers were determined via plaque assay. In brief, assay samples were diluted in a log<sub>10</sub> series from 10<sup>-2</sup> – 10<sup>-7</sup> in virus dilution media. 0.5ml of each dilution was used to treat confluent monolayers of MDCK cells. Media dilutions were incubated for 1 hour at 37°C with agitation every 15 min to ensure even coverage, before washing in warm PBS. Washed cells were covered in 2 ml 2x EMEM (MEM eagle minus phenol red, Lonza), 2x P/S, 2x L-Gln, supplemented with an equal volume of 3.8% (1.9% final (w/v)) NuSieve GTG agarose (Lonza) and 1 µg ml<sup>-1</sup> TPCK-trypsin. Agarose overlays were incubated 48 – 72 hours at 37°C to allow plaque development before fixing in 4% (w/v) paraformaldehyde and staining of cell monolayers in 1% (w/v) crystal violet solution. All assays were performed as three independent replicates.

## 5. Experimental Section

The pyranosyl carbohydrate abbreviations were used as: GalNAc, D-N-acetylgalactosamine; GlcNAc, D-N-acetylglucosamine; Neu5Ac, D-N-acetylneuraminic acid; Gal, D-galactose; Fuc, L-fucose.

### 5.1 Synthesis of sialosides with poly-LacNAc extensions.

The poly-LacNAc chain was extended on various N-linked and O-linked core structures (see Figure S1) as previously described (Peng et al., 2012). Briefly, the appropriate galactoside (1.0 - 20.0 mg) and UDP-GlcNAc (2.0 equiv./terminal galactose) were dissolved in HEPES buffer (50 mM, pH 7.2) with 25 mM KCl, 1 mM DTT, and 2 mM MgCl<sub>2</sub> in an appropriate microcentrifuge tube. *H. pylori* β-1,3-GlcNAcT and calf intestine alkaline phosphatase (CIAP) were added to the reaction mixture and incubated at 37°C. The product was purified by size-exclusion column with 0.1 M NH<sub>4</sub>HCO<sub>3</sub> (aq.) eluent.

The GlcNAc-terminated substrate (1.0 - 20.0 mg) and UDP-Gal (2.0 equiv./terminal GlcNAc) were dissolved in Tris buffer (50 mM, pH 7.5) with 10 mM MnCl<sub>2</sub> in an appropriate microcentrifuge tube. GalT-1 and CIAP were added to the reaction mixture and incubated at 37°C. The product was purified by size-exclusion column with 0.1 M NH<sub>4</sub>HCO<sub>3</sub> (aq.) eluent.

The LacNAc-extended glycan and CMP-NeuAc (2.0 equiv./terminal galactose) were dissolved in Tris buffer (50 mM, pH 7.5). Rat ST3Gal-III or human ST6Gal-I and CIAP were added to the reaction mixture and incubated at 37°C. The product was purified by size-exclusion column with 0.1 M NH<sub>4</sub>HCO<sub>3</sub> (aq.) eluent to give α2-3 or α2-6 sialosides, respectively. **Neu5Acα3Galβ4GlcNAcβ3Galβ3GalNAcα-Thr (26)**.

Compound **26a** (0.5 mg, 0.589 µmol), CMP-Neu5Ac (0.78 mg, 2.0 equiv.), and rST3Gal-III (3 mU) were dissolved in 118 µL buffer (50 mM Tris-HCl, pH 7.5, with 100 mU/mL of calf intestine alkaline phosphatase). After incubation overnight at 37°C, the insoluble precipitates were removed by centrifugation and the supernatant was concentrated and purified by Sephadex<sup>TM</sup> G-25 and lyophilized to give the final product as a white powder (0.6 mg, 90 % yield). <sup>1</sup>H NMR (600 MHz, D<sub>2</sub>O): δ = 4.95 (s, 1H), 4.69 (d, *J* = 8.0 Hz, 1H), 4.54 (d, *J* = 7.1 Hz, 1H), 4.48 – 4.42 (m, 2H), 4.28 (d, *J* = 10.3 Hz, 1H), 4.20 (s, 1H), 4.15 – 4.03 (m, 3H), 4.03 – 3.91 (m, 3H), 3.91 – 3.81 (m, 4H), 3.81 – 3.60 (m, 16H), 3.60 – 3.51 (m, 4H), 2.74 (d, *J* = 11.8 Hz, 1H), 2.03 (s, 3H), 2.01 (s, 3H), 2.00 (s, 3H), 1.79 (t, *J* = 11.3 Hz, 1H), 1.40 (d, *J* = 6.7 Hz, 3H); MALDI-TOF MS: permethylated [M + Na<sup>+</sup>] C<sub>64</sub>H<sub>114</sub>N<sub>4</sub>O<sub>31</sub>Na, calcd 1457, found 1457.6.

#### **Neu5Acα6Galβ4GlcNAcβ3Galβ3GalNAcα-Thr (87)**

Compound **26a** (0.5 mg, 0.589 µmol), CMP-Neu5Ac (0.78 mg, 2.0 equiv.), and hST6Gal-I (3 mU) were dissolved in 118 µL buffer (50 mM Tris-HCl, pH 7.5, with 100 mU/mL of calf intestine alkaline phosphatase). After incubation overnight at 37°C, the insoluble precipitates were removed by centrifugation and the supernatant was concentrated and purified by Sephadex<sup>TM</sup> G-25 and lyophilized to give the final product as a white powder (0.6 mg, 90 % yield). <sup>1</sup>H NMR (600 MHz, D<sub>2</sub>O): δ = 4.96 (s, 1H), 4.73 (d, *J* = 8.0 Hz, 1H), 4.48 – 4.41 (m, 3H), 4.28 (d, *J* = 10.3 Hz, 1H), 4.20 (s, 1H), 4.12 (s, 1H), 4.09 – 4.03 (m, 1H), 4.03 – 3.48 (m, 28H), 2.66 (d, *J* = 11.3 Hz, 1H), 2.03 (s, 6H), 2.01 (s, 3H), 1.71 (t, *J* = 11.5 Hz, 1H), 1.44 – 1.35 (m, 3H); MALDI-TOF MS: permethylated [M + Na<sup>+</sup>] C<sub>64</sub>H<sub>114</sub>N<sub>4</sub>O<sub>31</sub>Na, calcd 1457, found 1457.6.

#### **Galβ4GlcNAcβ3Galβ4GlcNAcβ3Galβ3GalNAcα-Thr (27a)**

Compound **26b** (21 mg, 20 µmol), UDP-Gal (24 mg, 2.0 equiv.), GalT-1 (60 mU) and CIAP (0.04 mU) were dissolved in 1 mL Tris-HCl buffer (50 mM, pH 7.5, with 0.1 mg/mL BSA, 20 mM MnCl<sub>2</sub>). The pH was carefully monitored and adjusted (to pH 7.5) as needed. After incubation overnight at 37°C, the insoluble precipitates were removed by centrifugation and the supernatant was concentrated and purified by Sephadex<sup>TM</sup> G-25 and



lyophilized to give the final product as a white powder (22 mg, 90 % yield).  $^1\text{H}$  NMR (600 MHz,  $\text{D}_2\text{O}$ ):  $\delta$  = 4.95 (d,  $J$  = 3.9 Hz, 1H), 4.72 – 4.67 (m, 2H), 4.50 – 4.38 (m, 4H), 4.28 (dd,  $J$  = 11.1, 3.8 Hz, 1H), 4.19 (d,  $J$  = 3.1 Hz, 1H), 4.14 (d,  $J$  = 3.3 Hz, 1H), 4.11 (d,  $J$  = 3.4 Hz, 1H), 4.06 (dd,  $J$  = 7.8, 4.6 Hz, 1H), 4.00 (dd,  $J$  = 11.1, 3.0 Hz, 1H), 3.97 – 3.88 (m, 3H), 3.88 – 3.60 (m, 23H), 3.60 – 3.50 (m, 5H), 2.03 (s, 3H), 2.02 (s, 3H), 2.01 (s, 3H), 1.40 (d,  $J$  = 6.7 Hz, 3H); MALDI-TOF MS:  $[\text{M} + \text{Na}^+]$   $\text{C}_{46}\text{H}_{78}\text{N}_{4}\text{O}_{33}\text{Na}$ , calcd 1237, found 1237.

#### **Neu5Ac $\alpha$ 3Gal $\beta$ 4GlcNAc $\beta$ 3Gal $\beta$ 4GlcNAc $\beta$ 3Gal $\beta$ 3GalNAc $\alpha$ -Thr (27).**

Compound **27a** (0.5 mg, 0.41  $\mu\text{mol}$ ), CMP-Neu5Ac (0.54 mg, 2.0 equiv.), and rST3Gal-III (2.5 mU) were dissolved in 103  $\mu\text{L}$  buffer (50 mM Tris-HCl, pH 7.5, with 100 mU/mL of calf intestine alkaline phosphatase). After incubation overnight at 37°C, the insoluble precipitates were removed by centrifugation and the supernatant was concentrated and purified by Sephadex<sup>TM</sup> G-25 and lyophilized to give the final product as a white powder (0.55 mg, 90 % yield).  $^1\text{H}$  NMR (600 MHz,  $\text{D}_2\text{O}$ ):  $\delta$  = 4.96 (s, 1H), 4.72 – 4.67 (m, 2H), 4.54 (d,  $J$  = 7.8 Hz, 1H), 4.48 – 4.42 (m, 3H), 4.29 (d,  $J$  = 11.0 Hz, 1H), 4.20 (s, 1H), 4.15 (s, 1H), 4.13 – 4.04 (m, 3H), 4.00 (d,  $J$  = 10.0 Hz, 1H), 3.97 – 3.91 (m, 3H), 3.91 – 3.48 (m, 34H), 2.75 (d,  $J$  = 11.6 Hz, 1H), 2.05 – 1.98 (m, 12H), 1.79 (t,  $J$  = 11.6 Hz, 1H), 1.40 (d,  $J$  = 6.4 Hz, 3H); MALDI-TOF MS: permethylated  $[\text{M} + \text{Na}^+]$   $\text{C}_{84}\text{H}_{149}\text{N}_{5}\text{O}_{41}\text{Na}$ , calcd 1906, found 1906.8.

#### **Neu5Ac $\alpha$ 6Gal $\beta$ 4GlcNAc $\beta$ 3Gal $\beta$ 4GlcNAc $\beta$ 3Gal $\beta$ 3GalNAc $\alpha$ -Thr (88).**

Compound **27a** (0.5 mg, 0.41  $\mu\text{mol}$ ), CMP-Neu5Ac (0.54 mg, 2.0 equiv.), and hST6Gal-I (2.5 mU) were dissolved in 103  $\mu\text{L}$  buffer (50 mM Tris-HCl, pH 7.5, with 100 mU/mL of calf intestine alkaline phosphatase). After incubation overnight at 37°C, the insoluble precipitates were removed by centrifugation and the supernatant was concentrated and purified by Sephadex<sup>TM</sup> G-25 and lyophilized to give the final product as a white powder (0.55 mg, 90 % yield).  $^1\text{H}$  NMR (600 MHz,  $\text{D}_2\text{O}$ ):  $\delta$  = 4.95 (s, 1H), 4.72 – 4.67 (m, 2H), 4.50 – 4.39 (m, 4H), 4.28 (d,  $J$  = 11.8 Hz, 1H), 4.20 (s, 1H), 4.15 (s, 1H), 4.11 (s, 1H), 4.08 – 4.04 (m, 1H), 4.03 – 3.48 (m, 39H), 2.66 (d,  $J$  = 12.1 Hz, 1H), 2.10 – 1.97 (m, 12H), 1.71 (t,  $J$  = 11.7 Hz, 1H), 1.45 – 1.36 (m, 3H); MALDI-TOF MS: permethylated  $[\text{M} + \text{Na}^+]$   $\text{C}_{84}\text{H}_{149}\text{N}_{5}\text{O}_{41}\text{Na}$ , calcd 1906, found 1906.8.

#### **GlcNAc $\beta$ 3Gal $\beta$ 4GlcNAc $\beta$ 3Gal $\beta$ 4GlcNAc $\beta$ 3Gal $\beta$ 3GalNAc $\alpha$ -Thr (27b).**

Compound **27a** (6.0 mg, 5  $\mu\text{mol}$ ) was treated with a mixture of 15 mU of HP  $\beta$ 3GlcNAcT and UDP-GlcNAc (4.9 mg, 1.5 equiv.) in 0.5 mL buffer (50 mM HEPES-NaOH buffer, pH 7.2, with 25 mM KCl, 1 mM DTT, 2 mM  $\text{MnCl}_2$ , 100 mU/mL of calf intestine alkaline phosphatase). The reaction mixture was incubated overnight at 37 °C. The insoluble precipitates were removed by centrifugation and the supernatant was concentrated, purified by Sephadex<sup>TM</sup> G-25 and lyophilized to give the final product as a white powder (6.5 mg, 90 % yield).  $^1\text{H}$  NMR (600 MHz,  $\text{D}_2\text{O}$ ):  $\delta$  = 4.95 (d,  $J$  = 3.9 Hz, 1H), 4.71 – 4.63 (m, 3H), 4.48 – 4.41 (m, 4H), 4.28 (dd,  $J$  = 11.1, 3.8 Hz, 1H), 4.19 (d,  $J$  = 3.1 Hz, 1H), 4.17-4.13 (m, 2H), 4.11 (d,  $J$  = 3.4 Hz, 1H), 4.06 (dd,  $J$  = 7.8, 4.6 Hz, 1H), 4.00 (dd,  $J$  = 11.1, 3.0 Hz, 1H), 3.96 – 3.91 (m, 2H), 3.88 (dd,  $J$  = 12.4, 2.1 Hz, 1H), 3.85 – 3.60 (m, 25H), 3.59 – 3.52 (m, 6H), 3.49 – 3.41 (m, 2H), 2.03 (s, 3H), 2.02 (s, 3H), 2.02 (s, 3H), 2.01 (s, 3H), 1.40 (d,  $J$  = 6.7 Hz, 3H); MALDI-TOF MS:  $[\text{M} + \text{Na}^+]$   $\text{C}_{54}\text{H}_{91}\text{N}_{5}\text{O}_{38}\text{Na}$ , calcd 1440, found 1440.

#### **Gal $\beta$ 4GlcNAc $\beta$ 3Gal $\beta$ 4GlcNAc $\beta$ 3Gal $\beta$ 4GlcNAc $\beta$ 3Gal $\beta$ 3GalNAc $\alpha$ -Thr (28a).**

Compound **27b** (11.3 mg, 8  $\mu\text{mol}$ ) was treated with a mixture of 20 mU of GalT-1 and UDP-Gal (7.3 mg, 1.5 equiv.) in 0.8 mL buffer (50 mM Tris-HCl buffer, pH 7.5, with 0.1 mg/mL BSA, 20 mM  $\text{MnCl}_2$ , 100 mU/mL of calf intestine alkaline phosphatase). The reaction mixture was incubated overnight at 37 °C. The insoluble precipitates were removed by centrifugation and the supernatant was concentrated, purified by Sephadex<sup>TM</sup> G-25 and lyophilized to give the final product as a white powder (12 mg, 94 % yield).  $^1\text{H}$  NMR (600 MHz,  $\text{D}_2\text{O}$ ):  $\delta$  = 4.95 (d,  $J$  = 3.8 Hz, 1H), 4.72 – 4.66 (m, 3H), 4.48 – 4.39 (m, 5H), 4.28 (dd,  $J$  = 11.1, 3.8 Hz, 1H), 4.19 (s, 1H), 4.17-4.13 (m, 2H), 4.11 (s, 1H), 4.06 (dd,  $J$  = 7.8, 4.7 Hz, 1H), 3.99 (dd,  $J$  = 11.1, 3.0 Hz, 1H), 3.96 – 3.88 (m, 4H), 3.86 – 3.48 (m, 38H), 2.03(s, 3H), 2.02 (s, 6H), 2.01 (s, 3H), 1.39 (d,  $J$  = 6.6 Hz, 3H); MALDI-TOF MS:  $[\text{M} + \text{Na}^+]$   $\text{C}_{60}\text{H}_{101}\text{N}_{5}\text{O}_{43}\text{Na}$ , calcd 1602, found 1603.

#### **Neu5Ac $\alpha$ 3Gal $\beta$ 4GlcNAc $\beta$ 3Gal $\beta$ 4GlcNAc $\beta$ 3Gal $\beta$ 4GlcNAc $\beta$ 3Gal $\beta$ 3GalNAc $\alpha$ -Thr (28).**

Compound **28a** (0.8 mg, 0.49  $\mu\text{mol}$ ), CMP-Neu5Ac (0.65 mg, 2.0 equiv.), and rST3Gal-III (1.6 mU) were dissolved in 245  $\mu\text{L}$  buffer (50 mM Tris-HCl, pH 7.5, with 100 mU/mL of calf intestine alkaline phosphatase). After incubation overnight at 37°C, the insoluble precipitates were removed by centrifugation and the supernatant was concentrated and purified by Sephadex<sup>TM</sup> G-25 and lyophilized to give the final product as a white powder (0.85 mg, 93 % yield).  $^1\text{H}$  NMR (600 MHz,  $\text{D}_2\text{O}$ ):  $\delta$  = 4.95 (d,  $J$  = 4.1 Hz, 1H), 4.72 – 4.66 (m,

3H), 4.54 (d,  $J = 8.2$  Hz, 1H), 4.49 – 4.40 (m, 4H), 4.28 (dd,  $J = 11.3, 3.5$  Hz, 1H), 4.19 (d,  $J = 2.3$  Hz, 1H), 4.17 – 4.13 (m, 2H), 4.13 – 4.08 (m, 2H), 4.06 (t,  $J = 5.9$  Hz, 1H), 4.03 – 3.47 (m, 49H), 2.74 (dd,  $J = 12.0, 4.4$  Hz, 1H), 2.08 – 1.95 (m, 15H), 1.78 (t,  $J = 12.1$  Hz, 1H), 1.40 (d,  $J = 6.6$  Hz, 3H); MALDI-TOF MS: permethylated [M-Thr + Na<sup>+</sup>] C98H173N5O49Na, calcd 2226, found 2226.9.

#### **Neu5Ac $\alpha$ 6Gal $\beta$ 4GlcNAc $\beta$ 3Gal $\beta$ 4GlcNAc $\beta$ 3Gal $\beta$ 4GlcNAc $\beta$ 3Gal $\beta$ 3GalNAc $\alpha$ -Thr (89).**

Compound **28a** (0.4 mg, 0.25  $\mu$ mol), CMP-Neu5Ac (0.4 mg, 2.0 equiv.), and hST6Gal-I (1 mU) were dissolved in 84  $\mu$ L buffer (50 mM Tris-HCl, pH 7.5, with 100 mU/mL of calf intestine alkaline phosphatase). After incubation overnight at 37°C, the insoluble precipitates were removed by centrifugation and the supernatant was concentrated and purified by Sephadex<sup>TM</sup> G-25 and lyophilized to give the final product as a white powder (0.4 mg, 85 % yield). <sup>1</sup>H NMR (600 MHz, D<sub>2</sub>O):  $\delta = 4.96$  (d,  $J = 4.5$  Hz, 1H), 4.74 – 4.65 (m, 3H), 4.49 – 4.41 (m, 5H), 4.29 (dd,  $J = 10.7, 3.6$  Hz, 1H), 4.20 (s, 1H), 4.17 – 4.13 (m, 2H), 4.11 (d,  $J = 3.6$  Hz, 1H), 4.09 – 4.03 (m, 1H), 4.03 – 3.45 (m, 50H), 2.66 (dd,  $J = 12.2, 4.8$  Hz, 1H), 2.08 – 1.97 (m, 15H), 1.71 (t,  $J = 12.5$  Hz, 1H), 1.40 (d,  $J = 6.8$  Hz, 3H); MALDI-TOF MS: permethylated [M-Thr + Na<sup>+</sup>] C98H173N5O49Na, calcd 2226, found 2226.9.

#### **GlcNAc $\beta$ 3Gal $\beta$ 4GlcNAc $\beta$ 3Gal $\beta$ 4GlcNAc $\beta$ 3Gal $\beta$ 4GlcNAc $\beta$ 3Gal $\beta$ 3GalNAc $\alpha$ -Thr (28b).**

Compound **28a** (7.7 mg, 4.8  $\mu$ mol) was treated with a mixture of 28 mU of HP  $\beta$ 3GlcNAcT and UDP-GlcNAc (5 mg, 1.5 equiv.) in 0.5 mL buffer (50 mM HEPES-NaOH buffer, pH 7.2, with 25 mM KCl, 1 mM DTT, 2 mM MnCl<sub>2</sub>, 100 mU/mL of calf intestine alkaline phosphatase). The reaction mixture was incubated overnight at 37 °C. The insoluble precipitates were removed by centrifugation and the supernatant was concentrated, purified by Sephadex<sup>TM</sup> G-25 and lyophilized to give the final product as a white powder (8 mg, 90 % yield). <sup>1</sup>H NMR (600 MHz, D<sub>2</sub>O):  $\delta = 4.95$  (d,  $J = 3.8$  Hz, 1H), 4.72-4.64 (m, 4H), 4.48-4.41 (m, 5H), 4.28 (dd,  $J = 11.1, 3.8$  Hz, 1H), 4.19 (s, 1H), 4.16 – 4.12 (m, 3H), 4.11 (s, 1H), 4.06 (t,  $J = 6.2$  Hz, 1H), 3.99 (dd,  $J = 11.0, 2.8$  Hz, 1H), 3.97-3.91 (m, 3H), 3.88 (d,  $J = 12.4$  Hz, 1H), 3.86 – 3.40 (m, 43H), 2.03(s, 3H), 2.02 (s, 9H), 2.01 (s, 3H), 1.40 (d,  $J = 6.6$  Hz, 1H); <sup>13</sup>C NMR (150 MHz, D<sub>2</sub>O):  $\delta = 175.7(3), 175.6(8), 175.4, 172.7, 105.4, 103.7, 103.6, 103.40, 100.1, 82.9, 82.8, 82.6, 79.0, 78.9, 77.4, 76.4, 75.7, 75.5, 75.3, 74.3, 73.0, 72.0, 70.8, 70.7, 70.5, 70.4, 69.7, 69.2, 69.1, 62.0, 61.7, 61.2, 60.6, 59.9, 56.4, 55.9, 49.3, 23.1, 23.0, 18.9$ ; MALDI-TOF MS: [M + Na<sup>+</sup>] C68H114N6O48Na, calcd 1805, found 1806.

#### **Gal $\beta$ 4GlcNAc $\beta$ 3Gal $\beta$ 4GlcNAc $\beta$ 3Gal $\beta$ 4GlcNAc $\beta$ 3Gal $\beta$ 4GlcNAc $\beta$ 3Gal $\beta$ 3GalNAc $\alpha$ -Thr (29a).**

Compound **28b** (6.7 mg, 3.7  $\mu$ mol) was treated with a mixture of 20 mU of GalT-1 and UDP-Gal (4.6 mg, 2.0 equiv.) in 0.75 mL buffer (50 mM Tris-HCl buffer, pH 7.5, with 0.1 mg/mL BSA, 20 mM MnCl<sub>2</sub>, 100 mU/mL of calf intestine alkaline phosphatase). The reaction mixture was incubated overnight at 37 °C. The insoluble precipitates were removed by centrifugation and the supernatant was concentrated, purified by Sephadex<sup>TM</sup> G-25 and lyophilized to give the final product as a white powder (7 mg, 96 % yield). <sup>1</sup>H NMR (600 MHz, D<sub>2</sub>O):  $\delta = 4.95$  (d,  $J = 3.8$  Hz, 1H), 4.72 – 4.65 (m, 4H), 4.49-4.41 (m, 6H), 4.28 (dd,  $J = 11.1, 3.8$  Hz, 1H), 4.19 (s, 1H), 4.16-4.13 (m, 3H), 4.11 (s, 1H), 4.06 (t,  $J = 6.3$  Hz, 1H), 4.00 (dd,  $J = 11.1, 2.9$  Hz, 1H), 3.97-3.90 (m, 5H), 3.86 – 3.50 (m, 48H), 2.03(s, 3H), 2.02 (s, 9H), 2.01 (s, 3H), 1.40 (d,  $J = 6.6$  Hz, 3H); MALDI-TOF MS: [M + Na<sup>+</sup>] C74H124N6O53Na, calcd 1967, found 1967.

#### **Neu5Ac $\alpha$ 3Gal $\beta$ 4GlcNAc $\beta$ 3Gal $\beta$ 4GlcNAc $\beta$ 3Gal $\beta$ 4GlcNAc $\beta$ 3Gal $\beta$ 4GlcNAc $\beta$ 3Gal $\beta$ 3GalNAc $\alpha$ -Thr (29).**

Compound **29a** (2 mg, 1  $\mu$ mol), CMP-Neu5Ac (1.3 mg, 2.0 equiv.), and rST3Gal-III (2.8 mU) were dissolved in 500  $\mu$ L buffer (50 mM Tris-HCl, pH 7.5, with 100 mU/mL of calf intestine alkaline phosphatase). After incubation overnight at 37°C, the insoluble precipitates were removed by centrifugation and the supernatant was concentrated and purified by Sephadex<sup>TM</sup> G-25 and lyophilized to give the final product as a white powder (2.1 mg, 91 % yield). <sup>1</sup>H NMR (600 MHz, D<sub>2</sub>O):  $\delta = 4.96$  (d,  $J = 4.2$  Hz, 1H), 4.73 – 4.65 (m, 4H), 4.54 (d,  $J = 7.8$  Hz, 1H), 4.48 – 4.40 (m, 5H), 4.28 (dd,  $J = 11.2, 3.7$  Hz, 1H), 4.22 – 4.18 (m, 1H), 4.17 – 4.13 (m, 3H), 4.12 – 4.08 (m, 2H), 4.06 (dd,  $J = 8.1, 5.1$  Hz, 1H), 4.00 (dd,  $J = 10.9, 2.9$  Hz, 1H), 3.97 – 3.90 (m, 5H), 3.90 – 3.49 (m, 54H), 2.74 (dd,  $J = 12.3, 4.7$  Hz, 1H), 2.06 – 1.97 (m, 18H), 1.79 (t,  $J = 12.3$  Hz, 1H), 1.40 (d,  $J = 6.7$  Hz, 3H); <sup>13</sup>C NMR (150 MHz, D<sub>2</sub>O):  $\delta = 175.8, 175.7, 175.4, 174.6, 172.5, 105.4, 103.7, 103.6, 103.5(5), 103.4, 103.3, 100.6, 100.1, 82.9, 82.6, 79.0, 78.9, 78.7, 77.4, 76.3, 76.0, 75.7, 75.3, 73.7, 73.0, 72.5, 72.0, 70.7, 70.5, 70.2, 69.6, 69.2, 69.1, 68.9, 68.3, 63.4, 62.0, 61.8, 61.7, 60.6, 59.8, 55.9, 52.5, 49.3, 40.4, 39.5, 23.1, 23.0, 22.8, 18.9$ ; MALDI-TOF MS: permethylated [M-Thr + Na<sup>+</sup>] C118H208N6O59Na, calcd 2675, found 2676.1.

**Neu5Ac $\alpha$ 6Gal $\beta$ 4GlcNAc $\beta$ 3Gal $\beta$ 4GlcNAc $\beta$ 3Gal $\beta$ 4GlcNAc $\beta$ 3Gal $\beta$ 4GlcNAc $\beta$ 3Gal $\beta$ 3GalNAc $\alpha$ -Thr (90).**

Compound **29a** (0.5 mg, 0.25  $\mu$ mol), CMP-Neu5Ac (0.4 mg, 2.0 equiv.), and hST6Gal-I (1 mU) were dissolved in 85  $\mu$ L buffer (50 mM Tris-HCl, pH 7.5, with 100 mU/mL of calf intestine alkaline phosphatase). After incubation overnight at 37°C, the insoluble precipitates were removed by centrifugation and the supernatant was concentrated and purified by Sephadex<sup>TM</sup> G-25 and lyophilized to give the final product as a white powder (0.5 mg, 89 % yield). <sup>1</sup>H NMR (600 MHz, D<sub>2</sub>O):  $\delta$  = 4.96 (d,  $J$  = 3.8 Hz, 1H), 4.74 – 4.65 (m, 4H), 4.49 – 4.41 (m, 6H), 4.29 (dd,  $J$  = 11.0, 3.6 Hz, 1H), 4.19 (d,  $J$  = 3.3 Hz, 1H), 4.17 – 4.13 (m, 3H), 4.11 (d,  $J$  = 3.9 Hz, 1H), 4.06 (dd,  $J$  = 7.6, 4.9 Hz, 1H), 4.02 – 3.47 (m, 61H), 2.66 (dd,  $J$  = 12.2, 4.7 Hz, 1H), 2.07 – 1.97 (m, 18H), 1.71 (t,  $J$  = 12.2 Hz, 1H), 1.40 (d,  $J$  = 6.8 Hz, 3H); MALDI-TOF MS: permethylated [M-Thr + Na<sup>+</sup>] C<sub>118</sub>H<sub>208</sub>N<sub>6</sub>O<sub>59</sub>Na, calcd 2675, found 2676.1.

**GlcNAc $\beta$ 3Gal $\beta$ 4GlcNAc $\beta$ 3Gal $\beta$ 4GlcNAc $\beta$ 3Gal $\beta$ 4GlcNAc $\beta$ 3Gal $\beta$ 4GlcNAc $\beta$ 3Gal $\beta$ 3GalNAc $\alpha$ -Thr (29b).**

Compound **29a** (6.3 mg, 3.2  $\mu$ mol) was treated with a mixture of 18 mU of HP  $\beta$ 3GlcNAcT and UDP-GlcNAc (4.2 mg, 2.0 equiv.) in 0.64 mL buffer (50 mM HEPES-NaOH buffer, pH 7.2, with 25 mM KCl, 1 mM DTT, 2 mM MnCl<sub>2</sub>, 100 mU/mL of calf intestine alkaline phosphatase). The reaction mixture was incubated overnight at 37 °C. The insoluble precipitates were removed by centrifugation and the supernatant was concentrated, purified by Sephadex<sup>TM</sup> G-25 and lyophilized to give the final product as a white powder (6.5 mg, 93 % yield). <sup>1</sup>H NMR (600 MHz, D<sub>2</sub>O):  $\delta$  = 4.95 (d,  $J$  = 3.8 Hz, 1H), 4.72 – 4.65 (m, 5H), 4.49-4.41 (m, 6H), 4.28 (dd,  $J$  = 11.0, 3.8 Hz, 1H), 4.19 (s, 1H), 4.17 – 4.13 (m, 4H), 4.11 (s, 1H), 4.06 (t,  $J$  = 6.3 Hz, 1H), 4.00 (d,  $J$  = 11.2 Hz, 1H), 3.96-3.91 (m, 4H), 3.88 (d,  $J$  = 12.1 Hz, 1H), 3.86 – 3.42 (m, 53H), 2.03(s, 3H), 2.02 (s, 12H), 2.01 (s, 3H), 1.40 (d,  $J$  = 6.6 Hz, 3H); MALDI-TOF MS: [M + Na<sup>+</sup>] C<sub>82</sub>H<sub>137</sub>N<sub>7</sub>O<sub>58</sub>Na, calcd 2170, found 2171.

**Gal $\beta$ 4GlcNAc $\beta$ 3Gal $\beta$ 3GalNAc $\alpha$ -Thr (30a).**

Compound **29b** (5.5 mg, 2.5  $\mu$ mol) was treated with a mixture of 15 mU of GalT-1 and UDP-Gal (3.1 mg, 2.0 equiv.) in 0.5 mL buffer (50 mM Tris-HCl buffer, pH 7.5, with 0.1 mg/mL BSA, 20 mM MnCl<sub>2</sub>, 100 mU/mL of calf intestine alkaline phosphatase). The reaction mixture was incubated overnight at 37 °C. The insoluble precipitates were removed by centrifugation and the supernatant was concentrated, purified by Sephadex<sup>TM</sup> G-25 and lyophilized to give the final product as a white powder (5 mg, 86 % yield). <sup>1</sup>H NMR (600 MHz, D<sub>2</sub>O):  $\delta$  = 4.95 (d,  $J$  = 4.0 Hz, 1H), 4.72 – 4.65 (m, 5H), 4.49-4.42 (m, 7H), 4.29 (d,  $J$  = 11.4 Hz, 1H), 4.19 (s, 1H), 4.17 – 4.13 (s, 4H), 4.11 (s, 1H), 4.06 (d,  $J$  = 6.9 Hz, 1H), 4.00 (d,  $J$  = 11.2 Hz, 1H), 3.97-3.89 (m, 7H), 3.87 – 3.48 (m, 57H), 2.03(s, 3H), 2.02 (s, 12H), 2.01 (s, 3H), 1.40 (d,  $J$  = 6.5 Hz, 2H); MALDI-TOF MS: [M + Na<sup>+</sup>] C<sub>88</sub>H<sub>147</sub>N<sub>7</sub>O<sub>63</sub>Na, calcd 2332, found 2332.

**Neu5Ac $\alpha$ 3Gal $\beta$ 4GlcNAc $\beta$ 3Gal $\beta$ 3GalNAc $\alpha$ -Thr (30).**

Compound **30a** (2 mg, 0.85  $\mu$ mol), CMP-Neu5Ac (1.1 mg, 2.0 equiv.), and rST3Gal-III (2.4 mU) were dissolved in 425  $\mu$ L buffer (50 mM Tris-HCl, pH 7.5, with 100 mU/mL of calf intestine alkaline phosphatase). After incubation overnight at 37°C, the insoluble precipitates were removed by centrifugation and the supernatant was concentrated and purified by Sephadex<sup>TM</sup> G-25 and lyophilized to give the final product as a white powder (2.0 mg, 91 % yield). <sup>1</sup>H NMR (600 MHz, D<sub>2</sub>O):  $\delta$  = 4.96 (d,  $J$  = 3.8 Hz, 1H), 4.72 – 4.65 (m, 5H), 4.54 (d,  $J$  = 7.8 Hz, 1H), 4.49 – 4.40 (m, 6H), 4.28 (dd,  $J$  = 11.0, 3.8 Hz, 1H), 4.22 – 4.17 (m, 1H), 4.17 – 4.13 (m, 4H), 4.12 – 4.08 (m, 2H), 4.06 (dd,  $J$  = 7.9, 5.2 Hz, 1H), 3.99 (dd,  $J$  = 10.9, 2.9 Hz, 1H), 3.97 – 3.90 (m, 6H), 3.90 – 3.51 (m, 64H), 2.74 (dd,  $J$  = 12.6, 4.9 Hz, 1H), 2.07 – 1.95 (m, 21H), 1.79 (t,  $J$  = 12.1 Hz, 1H), 1.40 (d,  $J$  = 6.7 Hz, 3H); MALDI-TOF MS: permethylated [M-Thr + Na<sup>+</sup>] C<sub>138</sub>H<sub>243</sub>N<sub>7</sub>O<sub>69</sub>Na, calcd 3124, found 3125.1.

**Neu5Ac $\alpha$ 6Gal $\beta$ 4GlcNAc $\beta$ 3Gal $\beta$ 3GalNAc $\alpha$ -Thr (91).**

Compound **30a** (0.5 mg, 0.21  $\mu$ mol), CMP-Neu5Ac (0.3 mg, 2.0 equiv.), and hST6Gal-I (0.6 mU) were dissolved in 42  $\mu$ L buffer (50 mM Tris-HCl, pH 7.5, with 100 mU/mL of calf intestine alkaline phosphatase). After incubation overnight at 37°C, the insoluble precipitates were removed by centrifugation and the supernatant was concentrated and purified by Sephadex<sup>TM</sup> G-25 and lyophilized to give the final product as a white powder (0.5 mg, 91 % yield). <sup>1</sup>H NMR (600 MHz, D<sub>2</sub>O):  $\delta$  = 4.96 (d,  $J$  = 3.8 Hz, 1H), 4.73 – 4.66 (m, 5H), 4.48 – 4.41 (m, 7H), 4.29 (dd,  $J$  = 10.9, 3.7 Hz, 1H), 4.19 (d,  $J$  = 2.6 Hz, 1H), 4.17 – 4.13 (m, 4H), 4.11 (d,  $J$  =



3.9 Hz, 1H), 4.06 (t,  $J = 6.6$  Hz, 1H), 4.02 – 3.48 (m, 72H), 2.66 (dd,  $J = 12.4, 4.4$  Hz, 1H), 2.07 – 1.97 (m, 21H), 1.71 (t,  $J = 12.2$  Hz, 1H), 1.40 (d,  $J = 6.7$  Hz, 3H); MALDI-TOF MS: permethylated [M-Thr + Na<sup>+</sup>] C138H243N7O69Na, calcd 3124, found 3125.1.

#### **GlcNAc $\beta$ 3Gal $\beta$ 4GlcNAc $\beta$ 3Gal $\beta$ 4GlcNAc $\beta$ 6(Gal $\beta$ 3)GalNAc $\alpha$ -Thr (33b).**

Compound **33a** (2.5 mg, 2  $\mu$ mol) was treated with a mixture of 14 mU of HP  $\beta$ 3GlcNAcT and UDP-GlcNAc (4.2 mg, 2.0 equiv.) in 0.4 mL buffer (50 mM HEPES-NaOH buffer, pH 7.2, with 25 mM KCl, 1 mM DTT, 2 mM MnCl<sub>2</sub>, 100 mU/mL of calf intestine alkaline phosphatase). The reaction mixture was incubated overnight at 37 °C. The insoluble precipitates were removed by centrifugation and the supernatant was concentrated, purified by Sephadex<sup>TM</sup> G-25 and lyophilized to give the final product as a white powder (2.7 mg, 95 % yield). <sup>1</sup>H NMR (500 MHz, D<sub>2</sub>O):  $\delta = 4.97$  (d,  $J = 3.9$  Hz, 1H), 4.74 – 4.67 (m, 2H), 4.59 (d,  $J = 8.3$  Hz, 1H), 4.53 – 4.40 (m, 4H), 4.31 (dd,  $J = 11.2, 3.7$  Hz, 1H), 4.26 – 4.15 (m, 4H), 4.13 (d,  $J = 11.1$  Hz, 1H), 4.08 – 3.89 (m, 6 H), 3.88 – 3.42 (m, 31H), 2.07 (s, 3H), 2.06 (s, 9H), 1.39 (d,  $J = 6.6$  Hz, 3H); <sup>13</sup>C NMR (150 MHz, D<sub>2</sub>O):  $\delta = 175.7, 175.6, 175.4, 175.0, 172.5, 105.4, 103.6, 103.5, 101.8, 100.1, 82.8, 79.1, 78.8, 77.2, 76.4, 75.7, 75.6, 75.6, 75.5, 75.3, 74.3, 73.5, 73.2, 72.9, 71.3, 70.8, 70.7, 70.7, 70.4, 69.9, 69.3, 69.1, 61.8, 61.7, 61.2, 60.7, 60.6, 59.9, 56.4, 55.9, 55.7, 49.2, 23.0, 22.9, 19.1$ ; MALDI-TOF MS: [M + Na<sup>+</sup>] C54H91N5O38Na, calcd 1440, found 1441.

#### **Gal $\beta$ 4GlcNAc $\beta$ 3Gal $\beta$ 4GlcNAc $\beta$ 3Gal $\beta$ 4GlcNAc $\beta$ 6(Gal $\beta$ 3)GalNAc $\alpha$ -Thr (34a).**

Compound **33b** (2.4 mg, 1.7  $\mu$ mol) was treated with a mixture of 15 mU of GalT-1 and UDP-Gal (2 mg, 2.0 equiv.) in 0.17 mL buffer (50 mM Tris-HCl buffer, pH 7.5, with 0.1 mg/mL BSA, 20 mM MnCl<sub>2</sub>, 100 mU/mL of calf intestine alkaline phosphatase). The reaction mixture was incubated overnight at 37 °C. The insoluble precipitates were removed by centrifugation and the supernatant was concentrated, purified by Sephadex<sup>TM</sup> G-25 and lyophilized to give the final product as a white powder (2.5 mg, 92 % yield). <sup>1</sup>H NMR (600 MHz, D<sub>2</sub>O):  $\delta = 4.93$  (d,  $J = 3.9$  Hz, 1H), 4.69 (d,  $J = 8.3$  Hz, 2H), 4.56 (d,  $J = 8.4$  Hz, 1H), 4.50 – 4.36 (m, 5H), 4.27 (dd,  $J = 11.1, 3.8$  Hz, 1H), 4.21 – 4.11 (m, 4H), 4.09 (m, 1H), 4.03 – 3.87 (m, 6H), 3.87 – 3.45 (m, 37H), 2.04 (s, 3H), 2.03 (s, 3H), 2.02 (s, 6H), 1.35 (d,  $J = 6.8$  Hz, 3H); <sup>13</sup>C NMR (150 MHz, D<sub>2</sub>O):  $\delta = 175.7, 175.4, 175.0, 172.5, 105.4, 103.7, 103.6(3), 103.5(5), 101.9, 100.1, 82.9, 82.8, 79.2, 78.9, 77.3, 76.1, 75.8, 75.7, 75.6, 75.3, 73.6, 73.3, 73.0, 71.7, 71.4, 70.9, 70.7, 69.9, 69.4, 69.3, 69.1, 61.82, 61.7(5), 60.8, 60.6, 59.9, 56.0, 55.9, 55.7, 49.3, 23.1, 23.0, 19.1$ ; MALDI-TOF MS: [M + Na<sup>+</sup>] C60H101N5O43Na, calcd 1602, found 1603.

#### **Neu5Ac $\alpha$ 3Gal $\beta$ 4GlcNAc $\beta$ 3Gal $\beta$ 4GlcNAc $\beta$ 3Gal $\beta$ 4GlcNAc $\beta$ 6(Gal $\beta$ 3)GalNAc $\alpha$ -Thr (34).**

Compound **34a** (0.5 mg, 0.32  $\mu$ mol), CMP-Neu5Ac (0.5 mg, 2.0 equiv.), and rST3Gal-III (1 mU) were dissolved in 158  $\mu$ L buffer (50 mM Tris-HCl, pH 7.5, with 100 mU/mL of calf intestine alkaline phosphatase). After incubation overnight at 37°C, the insoluble precipitates were removed by centrifugation and the supernatant was concentrated and purified by Sephadex<sup>TM</sup> G-25 and lyophilized to give the final product as a white powder (0.5 mg, 85 % yield). <sup>1</sup>H NMR (600 MHz, D<sub>2</sub>O):  $\delta = 4.93$  (d,  $J = 3.5$  Hz, 1H), 4.71 – 4.65 (m, 2H), 4.58 – 4.52 (m, 2H), 4.48 – 4.37 (m, 3H), 4.27 (dd,  $J = 11.1, 3.7$  Hz, 1H), 4.19 (d,  $J = 3.4$  Hz, 1H), 4.18 – 4.13 (m, 3H), 4.13 – 4.07 (m, 2H), 4.04 – 3.52 (m, 60H), 2.74 (dd,  $J = 12.6, 4.5$  Hz, 1H), 2.07 – 1.96 (m, 15H), 1.79 (t,  $J = 12.2$  Hz, 1H), 1.36 (d,  $J = 6.7$  Hz, 3H); MALDI-TOF MS: permethylated [M-Thr + Na<sup>+</sup>] C98H173N5O49Na, calcd 2226, found 2226.7.

#### **Neu5Ac $\alpha$ 6Gal $\beta$ 4GlcNAc $\beta$ 3Gal $\beta$ 4GlcNAc $\beta$ 3Gal $\beta$ 4GlcNAc $\beta$ 6(Gal $\beta$ 3)GalNAc $\alpha$ -Thr (94).**

Compound **34a** (0.5 mg, 0.32  $\mu$ mol), CMP-Neu5Ac (0.5 mg, 2.0 equiv.), and hST6Gal-I (1 mU) were dissolved in 158  $\mu$ L buffer (50 mM Tris-HCl, pH 7.5, with 100 mU/mL of calf intestine alkaline phosphatase). After incubation overnight at 37°C, the insoluble precipitates were removed by centrifugation and the supernatant was concentrated and purified by Sephadex<sup>TM</sup> G-25 and lyophilized to give the final product as a white powder (0.5 mg, 85 % yield). <sup>1</sup>H NMR (600 MHz, D<sub>2</sub>O):  $\delta = 4.93$  (d,  $J = 4.2$  Hz, 1H), 4.74 – 4.67 (m, 2H), 4.55 (d,  $J = 8.4$  Hz, 1H), 4.48 – 4.37 (m, 5H), 4.27 (dd,  $J = 11.2, 3.5$  Hz, 1H), 4.19 (d,  $J = 3.4$  Hz, 1H), 4.18 – 4.12 (m, 3H), 4.11 – 4.07 (m, 1H), 4.03 – 3.44 (m, 50H), 2.66 (dd,  $J = 12.4, 4.6$  Hz, 1H), 2.07 – 1.98 (m, 15H), 1.71 (t,  $J = 12.3$  Hz, 1H), 1.35 (d,  $J = 6.8$  Hz, 3H); MALDI-TOF MS: permethylated [M-Thr + Na<sup>+</sup>] C98H173N5O49Na, calcd 2226, found 2226.7.

#### **GlcNAc $\beta$ 3Gal $\beta$ 4GlcNAc $\beta$ 3Gal $\beta$ 4GlcNAc $\beta$ 3Gal $\beta$ 4GlcNAc $\beta$ 6(Gal $\beta$ 3)GalNAc $\alpha$ -Thr (34b).**

Compound **34a** (2.3 mg, 1.46  $\mu$ mol) was treated with a mixture of 8.5 mU of HP  $\beta$ 3GlcNAcT and UDP-GlcNAc (4.2 mg, 2.0 equiv.) in 0.15 mL buffer (50 mM HEPES-NaOH buffer, pH 7.2, with 25 mM KCl, 1 mM DTT, 2 mM MnCl<sub>2</sub>, 100 mU/mL of calf intestine alkaline phosphatase). The reaction mixture was incubated overnight at 37 °C. The insoluble precipitates were removed by centrifugation and the supernatant was concentrated, purified by Sephadex™ G-25 and lyophilized to give the final product as a white powder (2.2 mg, 85 % yield). <sup>1</sup>H NMR (600 MHz, D<sub>2</sub>O):  $\delta$  = 4.93 (d, *J* = 3.9 Hz, 1H), 4.71-4.66 (m, 3H), 4.56 (d, *J* = 8.3 Hz, 1H), 4.48 – 4.36 (m, 5H), 4.27 (dd, *J* = 11.1, 3.8 Hz, 1H), 4.23 – 4.12 (m, 5H), 4.09 (dd, *J* = 11.0, 3.1 Hz, 1H), 4.04 – 3.86 (m, 7H), 3.84 – 3.39 (m, 41H), 2.04 (s, 3H), 2.02 (s, 6H), 2.01 (s, 6H), 1.35 (d, *J* = 6.8 Hz, 3H); <sup>13</sup>C NMR (150 MHz, D<sub>2</sub>O):  $\delta$  = 175.7(4), 175.6(9), 175.4, 175.0, 172.9, 105.4, 103.7, 103.6, 101.9, 100.1, 82.9, 82.8, 79.2, 78.9, 77.3, 76.4, 75.8, 75.7(3), 75.6(7), 75.6, 75.3, 74.3, 73.6, 73.3, 72.9, 71.4, 70.8, 70.8, 70.7(4), 70.6(9), 70.4, 69.9, 69.4, 69.1, 61.8, 61.7, 61.2, 60.8, 60.6, 60.0, 56.4, 55.9, 55.7, 49.3, 23.1, 23.0, 19.1; MALDI-TOF MS: [M + Na<sup>+</sup>] C68H114N6O48Na, calcd 1805, found 1806.

#### **Gal $\beta$ 4GlcNAc $\beta$ 3Gal $\beta$ 4GlcNAc $\beta$ 3Gal $\beta$ 4GlcNAc $\beta$ 3Gal $\beta$ 4GlcNAc $\beta$ 6(Gal $\beta$ 3)GalNAc $\alpha$ -Thr (35a).**

Compound **34b** (1.9 mg, 1.05  $\mu$ mol) was treated with a mixture of 15 mU of GalT-1 and UDP-Gal (1.3 mg, 2.0 equiv.) in 0.1 mL buffer (50 mM Tris-HCl buffer, pH 7.5, with 0.1 mg/mL BSA, 20 mM MnCl<sub>2</sub>, 100 mU/mL of calf intestine alkaline phosphatase). The reaction mixture was incubated overnight at 37 °C. The insoluble precipitates were removed by centrifugation and the supernatant was concentrated, purified by Sephadex™ G-25 and lyophilized to give the final product as a white powder (1.9 mg, 93 % yield). <sup>1</sup>H NMR (600 MHz, D<sub>2</sub>O):  $\delta$  = 4.93 (d, *J* = 3.9 Hz, 1H), 4.72-4.66 (m, 3H), 4.55 (d, *J* = 8.3 Hz, 1H), 4.51 – 4.37 (m, 6H), 4.27 (dd, *J* = 10.9, 3.8 Hz, 1H), 4.22 – 4.06 (m, 6H), 4.05 – 3.87 (m, 8H), 3.86 – 3.46 (m, 46H), 2.04 (s, 3H), 2.03 – 2.00 (m, 12H), 1.35 (d, *J* = 6.8 Hz, 3H); <sup>13</sup>C NMR (150 MHz, D<sub>2</sub>O):  $\delta$  = 175.70, 175.40, 175.03, 172.67, 105.42, 103.67, 103.56, 101.86, 100.14, 82.86, 82.80, 79.16, 78.90, 77.29, 76.14, 75.78, 75.66, 75.60, 75.33, 73.57, 73.28, 72.96, 71.75, 71.36, 70.84, 70.74, 69.91, 69.37, 69.33, 69.11, 61.82, 61.75, 60.80, 60.62, 59.94, 55.97, 55.93, 55.73, 49.27, 23.08, 22.95, 19.11; MALDI-TOF MS: [M + Na<sup>+</sup>] C74H124N6O53Na, calcd 1967, found 1967.

#### **Neu5Ac $\alpha$ 3Gal $\beta$ 4GlcNAc $\beta$ 3Gal $\beta$ 4GlcNAc $\beta$ 3Gal $\beta$ 4GlcNAc $\beta$ 3Gal $\beta$ 4GlcNAc $\beta$ 6(Gal $\beta$ 3)GalNAc $\alpha$ -Thr (35).**

Compound **35a** (2 mg, 1.03  $\mu$ mol), CMP-Neu5Ac (1.4 mg, 2.0 equiv.), and rST3Gal-III (3 mU) were dissolved in 505  $\mu$ L buffer (50 mM Tris-HCl, pH 7.5, with 100 mU/mL of calf intestine alkaline phosphatase). After incubation overnight at 37°C, the insoluble precipitates were removed by centrifugation and the supernatant was concentrated and purified by Sephadex™ G-25 and lyophilized to give the final product as a white powder (2 mg, 87 % yield). <sup>1</sup>H NMR (600 MHz, D<sub>2</sub>O):  $\delta$  = 4.93 (d, *J* = 4.2 Hz, 1H), 4.71 – 4.66 (m, 3H), 4.58 – 4.51 (m, 2H), 4.48 – 4.38 (m, 5H), 4.27 (dd, *J* = 10.9, 3.7 Hz, 1H), 4.22 – 4.18 (m, 1H), 4.18 – 4.13 (m, 4H), 4.12 – 4.06 (m, 2H), 4.04 – 3.52 (m, 60H), 2.74 (dd, *J* = 12.1, 4.4 Hz, 1H), 2.06 – 1.96 (m, 18H), 1.79 (t, *J* = 12.1 Hz, 1H), 1.35 (d, *J* = 7.1 Hz, 3H); MALDI-TOF MS: permethylated [M-Thr + Na<sup>+</sup>] C118H208N6O59Na, calcd 2675, found 2676.0.

#### **Neu5Ac $\alpha$ 6Gal $\beta$ 4GlcNAc $\beta$ 3Gal $\beta$ 4GlcNAc $\beta$ 3Gal $\beta$ 4GlcNAc $\beta$ 3Gal $\beta$ 4GlcNAc $\beta$ 6(Gal $\beta$ 3)GalNAc $\alpha$ -Thr (95).**

Compound **35a** (0.5 mg, 0.26  $\mu$ mol), CMP-Neu5Ac (0.4 mg, 2.0 equiv.), and hST6Gal-I (1 mU) were dissolved in 86  $\mu$ L buffer (50 mM Tris-HCl, pH 7.5, with 100 mU/mL of calf intestine alkaline phosphatase). After incubation overnight at 37°C, the insoluble precipitates were removed by centrifugation and the supernatant was concentrated and purified by Sephadex™ G-25 and lyophilized to give the final product as a white powder (0.55 mg, 85 % yield). <sup>1</sup>H NMR (600 MHz, D<sub>2</sub>O):  $\delta$  = 4.93 (d, *J* = 4.2 Hz, 1H), 4.73 – 4.66 (m, 3H), 4.56 (d, *J* = 8.3 Hz, 1H), 4.49 – 4.37 (m, 6H), 4.27 (dd, *J* = 10.9, 3.6 Hz, 1H), 4.19 (d, *J* = 2.9 Hz, 1H), 4.18 – 4.13 (m, 4H), 4.09 (d, *J* = 8.3 Hz, 1H), 4.03 – 3.43 (m, 61H), 2.66 (dd, *J* = 12.2, 4.5 Hz, 1H), 2.07 – 1.97 (m, 18H), 1.71 (t, *J* = 12.1 Hz, 1H), 1.35 (d, *J* = 7.0 Hz, 3H); MALDI-TOF MS: permethylated [M-Thr + Na<sup>+</sup>] C118H208N6O59Na, calcd 2675, found 2676.0.

#### **Gal $\beta$ 4GlcNAc $\beta$ 3Gal $\beta$ 4GlcNAc $\beta$ 3Gal $\beta$ 4GlcNAc $\beta$ 3Gal $\beta$ 4GlcNAc $\beta$ 3Gal $\beta$ 4GlcNAc $\beta$ 6(Gal $\beta$ 3)GalNAc $\alpha$ -Thr (36a).**

Compound **35a** (1.6 mg, 0.82  $\mu$ mol) was treated with a mixture of 8.5 mU of HP  $\beta$ 3GlcNAcT and UDP-GlcNAc (4.2 mg, 2.0 equiv.) in 82  $\mu$ L buffer (50 mM HEPES-NaOH buffer, pH 7.2, with 25 mM KCl, 1 mM DTT, 2 mM MnCl<sub>2</sub>, 100 mU/mL of calf intestine alkaline phosphatase). The reaction mixture was incubated overnight at 37 °C. The insoluble precipitates were removed by centrifugation and the supernatant was

concentrated, purified by Sephadex™ G-25 and lyophilized to give **35b** as a white powder (1.5 mg, 85 % yield). MALDI-TOF MS:  $[M + Na^+]$  C82H137N7O58Na, calcd 2170, found 2170.

Compound **35b** (1.22 mg, 0.57  $\mu$ mol) was treated with a mixture of 15 mU of GalT-1 and UDP-Gal (1.3 mg, 2.0 equiv.) in 57  $\mu$ L buffer (50 mM Tris-HCl buffer, pH 7.5, with 0.1 mg/mL BSA, 20 mM MnCl<sub>2</sub>, 100 mU/mL of calf intestine alkaline phosphatase). The reaction mixture was incubated overnight at 37 °C. The insoluble precipitates were removed by centrifugation and the supernatant was concentrated, purified by Sephadex™ G-25 and lyophilized to give the final product as a white powder (1.1 mg, 85 % yield). <sup>1</sup>H NMR (600 MHz, D<sub>2</sub>O):  $\delta$  = 4.93 (s, 1H), 4.72-4.66 (m, 4H), 4.56 (d,  $J$  = 8.3 Hz, 1H), 4.49-4.41 (m, 6H), 4.39-4.33 (m, 1H), 4.27 (d,  $J$  = 7.8 Hz, 1H), 4.23 – 4.06 (m, 8H), 4.03-3.87 (m, 10H), 3.87-3.45 (m, 19H), 2.03 (s, 3H), 2.02 (s, 15H), 1.34 (d,  $J$  = 6.7 Hz, 3H); <sup>13</sup>C NMR (151 MHz, D<sub>2</sub>O):  $\delta$  = 175.69, 175.04, 105.42, 103.67, 103.56, 101.86, 100.11, 82.85, 79.16, 78.90, 77.36, 76.14, 75.77, 75.65, 75.33, 73.56, 73.28, 72.96, 71.75, 71.36, 70.74, 69.91, 69.37, 69.33, 69.11, 61.82, 61.75, 60.61, 55.93, 49.31, 23.08, 22.95, 19.10; MALDI-TOF MS:  $[M + Na^+]$  C88H147N7O63Na, calcd 2332, found 2333.

#### **Neu5Ac $\alpha$ 3Gal $\beta$ 4GlcNAc $\beta$ 3Gal $\beta$ 4GlcNAc $\beta$ 3Gal $\beta$ 4GlcNAc $\beta$ 3Gal $\beta$ 4GlcNAc $\beta$ 6(Gal $\beta$ 3)GalNAc $\alpha$ -Thr (36).**

Compound **36a** (2 mg, 0.87  $\mu$ mol), CMP-Neu5Ac (1.1 mg, 2.0 equiv.), and rST3Gal-III (0.5 mU) were dissolved in 433  $\mu$ L buffer (50 mM Tris-HCl, pH 7.5, with 100 mU/mL of calf intestine alkaline phosphatase). After incubation overnight at 37°C, the insoluble precipitates were removed by centrifugation and the supernatant was concentrated and purified by Sephadex™ G-25 and lyophilized to give the final product as a white powder (2.1 mg, 93 % yield). <sup>1</sup>H NMR (600 MHz, D<sub>2</sub>O):  $\delta$  = 4.93 (d,  $J$  = 3.9 Hz, 1H), 4.72 – 4.65 (m, 4H), 4.59 – 4.51 (m, 2H), 4.49 – 4.36 (m, 7H), 4.27 (dd,  $J$  = 11.1, 3.8 Hz, 1H), 4.19 (d,  $J$  = 4.2 Hz, 1H), 4.18 – 4.12 (m, 6H), 4.12 – 4.07 (m, 2H), 4.03 – 3.36 (m, 69H), 2.74 (dd,  $J$  = 12.8, 4.8 Hz, 1H), 2.06 – 1.96 (m, 21H), 1.79 (t,  $J$  = 12.1 Hz, 1H), 1.35 (d,  $J$  = 6.7 Hz, 3H); MALDI-TOF MS: permethylated  $[M\text{-Thr} + Na^+]$  C138H243N7O69Na, calcd 3124, found 3125.1.

#### **Neu5Ac $\alpha$ 6Gal $\beta$ 4GlcNAc $\beta$ 3Gal $\beta$ 4GlcNAc $\beta$ 3Gal $\beta$ 4GlcNAc $\beta$ 3Gal $\beta$ 4GlcNAc $\beta$ 6(Gal $\beta$ 3)GalNAc $\alpha$ -Thr (96).**

Compound **36a** (0.5 mg, 0.22  $\mu$ mol), CMP-Neu5Ac (0.3 mg, 2.0 equiv.), and hST6Gal-I (1 mU) were dissolved in 72  $\mu$ L buffer (50 mM Tris-HCl, pH 7.5, with 100 mU/mL of calf intestine alkaline phosphatase). After incubation overnight at 37°C, the insoluble precipitates were removed by centrifugation and the supernatant was concentrated and purified by Sephadex™ G-25 and lyophilized to give the final product as a white powder (0.5 mg, 89 % yield). <sup>1</sup>H NMR (600 MHz, D<sub>2</sub>O):  $\delta$  = 4.93 (d,  $J$  = 3.6 Hz, 1H), 4.73 – 4.66 (m, 4H), 4.56 (d,  $J$  = 8.2 Hz, 1H), 4.49 – 4.36 (m, 7H), 4.27 (dd,  $J$  = 11.1, 3.8 Hz, 1H), 4.19 (d,  $J$  = 2.7 Hz, 1H), 4.18 – 4.12 (m, 5H), 4.09 (d,  $J$  = 8.1 Hz, 1H), 4.04 – 3.44 (m, 72H), 2.66 (dd,  $J$  = 12.4, 4.7 Hz, 1H), 2.07 – 1.97 (m, 21H), 1.71 (t,  $J$  = 12.3 Hz, 1H), 1.35 (d,  $J$  = 6.7 Hz, 3H); MALDI-TOF MS: permethylated  $[M\text{-Thr} + Na^+]$  C138H243N7O69Na, calcd 3124, found 3125.2.

#### **GlcNAc $\beta$ 3Gal $\beta$ 4GlcNAc $\beta$ 3Gal $\beta$ 4GlcNAc $\beta$ 6(GlcNAc $\beta$ 3Gal $\beta$ 4GlcNAc $\beta$ 3Gal $\beta$ 3)GalNAc $\alpha$ -Thr (37d).**

Compound **37c** (1.75 mg, 1.11  $\mu$ mol) was treated with a mixture of 25 mU of HP  $\beta$ 3GlcNAcT and UDP-GlcNAc (2.9 mg, 4.0 equiv.) in 111  $\mu$ L buffer (50 mM HEPES-NaOH buffer, pH 7.2, with 25 mM KCl, 1 mM DTT, 2 mM MnCl<sub>2</sub>, 100 mU/mL of calf intestine alkaline phosphatase). The reaction mixture was incubated overnight at 37 °C. The insoluble precipitates were removed by centrifugation and the supernatant was concentrated, purified by Sephadex™ G-25 and lyophilized to give **37d** as a white powder (1.96 mg, 89 % yield). <sup>1</sup>H NMR (600 MHz, D<sub>2</sub>O):  $\delta$  = 4.93 (d,  $J$  = 3.8 Hz, 1H), 4.72 – 4.63 (m, 4H), 4.55 (d,  $J$  = 8.3 Hz, 1H), 4.49 – 4.36 (m, 5H), 4.27 (dd,  $J$  = 11.1, 3.8 Hz, 1H), 4.19 – 4.06 (m, 7H), 4.02 – 3.85 (m, 7H), 3.86 – 3.39 (m, 46H), 2.03 (s, 3H), 2.02 (s, 9H), 2.01 (s, 3H), 2.00 (s, 3H), 1.35 (d,  $J$  = 6.7 Hz, 3H); <sup>13</sup>C NMR (150 MHz, D<sub>2</sub>O):  $\delta$  = 175.7, 175.7, 175.0, 105.4, 103.7, 103.5, 103.4, 101.9, 100.1, 82.8, 82.6, 79.1, 79.0, 78.9, 77.1, 76.4, 75.7, 75.6, 75.3, 74.3, 73.6, 73.0, 70.9, 70.8, 70.7, 70.5, 70.4, 70.0, 69.2, 69.1, 61.8, 61.2, 60.8, 60.6, 59.9, 56.4, 55.9, 55.7, 49.24, 2.12, 23.1, 23.0, 19.1; MALDI-TOF MS:  $[M + Na^+]$  C76H127N7O53Na, calcd 2008, found 2009.

#### **Gal $\beta$ 4GlcNAc $\beta$ 3Gal $\beta$ 4GlcNAc $\beta$ 3Gal $\beta$ 4GlcNAc $\beta$ 6(Gal $\beta$ 4GlcNAc $\beta$ 3Gal $\beta$ 4GlcNAc $\beta$ 3Gal $\beta$ 3)GalNAc $\alpha$ -Thr (37e).**



Compound **37d** (1.76 mg, 0.89  $\mu\text{mol}$ ) was treated with a mixture of 15 mU of GalT-1 and UDP-Gal (2.2 mg, 4.0 equiv.) in 89  $\mu\text{L}$  buffer (50 mM Tris-HCl buffer, pH 7.5, with 0.1 mg/mL BSA, 20 mM  $\text{MnCl}_2$ , 100 mU/mL of calf intestine alkaline phosphatase). The reaction mixture was incubated overnight at 37  $^\circ\text{C}$ . The insoluble precipitates were removed by centrifugation and the supernatant was concentrated, purified by Sephadex<sup>TM</sup> G-25 and lyophilized to give the final product as a white powder (1.81 mg, 87 % yield).  $^1\text{H}$  NMR (600 MHz,  $\text{D}_2\text{O}$ ):  $\delta$  = 4.92 (d,  $J$  = 3.1 Hz, 1H), 4.72-4.67 (m, 4H), 4.55 (d,  $J$  = 8.4 Hz, 1H), 4.49 – 4.35 (m, 7H), 4.27 (dd,  $J$  = 11.7, 4.0 Hz, 1H), 4.21 – 4.06 (m, 7H), 4.03 – 3.88 (m, 8H), 3.86 – 3.49 (m, 57H), 2.03 (s, 3H), 2.02 (s, 12H), 2.01 (s, 3H), 1.34 (d,  $J$  = 6.4 Hz, 3H);  $^{13}\text{C}$  NMR (150 MHz,  $\text{D}_2\text{O}$ ):  $\delta$  = 175.7, 175.0, 105.4, 103.7, 103.6, 103.5(6), 103.4, 101.9, 100.1, 82.9, 82.6, 79.2, 78.9, 77.2, 76.1, 75.7, 75.6, 75.3, 73.6, 73.3, 73.0, 71.8, 70.9, 70.7, 70.5, 70.0, 69.3, 69.1, 61.8, 61.7(5), 60.8, 60.6, 60.0, 56.0, 55.7, 49.3, 23.1, 23.1, 23.0, 19.1; MALDI-TOF MS:  $[\text{M} + \text{Na}^+]$  C88H147N7O63Na, calcd 2332, found 2333.

**GlcNAc $\beta$ 3Gal $\beta$ 4GlcNAc $\beta$ 3Gal $\beta$ 4GlcNAc $\beta$ 3Gal $\beta$ 4GlcNAc $\beta$ 6(GlcNAc $\beta$ 3Gal $\beta$ 4GlcNAc $\beta$ 3Gal $\beta$ 4GlcNAc $\beta$ 3Gal $\beta$ 3)GalNAc $\alpha$ -Thr (37f).**

Compound **37e** (1.56 mg, 0.68  $\mu\text{mol}$ ) was treated with a mixture of 9 mU of HP  $\beta$ 3GlcNAcT and UDP-GlcNAc (1.8 mg, 4.0 equiv.) in 68  $\mu\text{L}$  buffer (50 mM HEPES-NaOH buffer, pH 7.2, with 25 mM KCl, 1 mM DTT, 2 mM  $\text{MnCl}_2$ , 100 mU/mL of calf intestine alkaline phosphatase). The reaction mixture was incubated overnight at 37  $^\circ\text{C}$ . The insoluble precipitates were removed by centrifugation and the supernatant was concentrated, purified by Sephadex<sup>TM</sup> G-25 and lyophilized to give the final product as a white powder (1.84 mg, 100 % yield).  $^1\text{H}$  NMR (600 MHz,  $\text{D}_2\text{O}$ ):  $\delta$  = 4.92 (d,  $J$  = 3.8 Hz, 1H), 4.72 – 4.64 (m, 6H), 4.55 (d,  $J$  = 8.3 Hz, 1H), 4.48 – 4.37 (m, 7H), 4.27 (dd,  $J$  = 11.3, 3.6 Hz, 1H), 4.20 – 4.07 (m, 9H), 4.03 – 3.36 (m, 75H), 2.03 (s, 3H), 2.02-2.01 (m, 18H), 2.01 (s, 3H), 1.35 (d,  $J$  = 6.8 Hz, 3H);  $^{13}\text{C}$  NMR (150 MHz,  $\text{D}_2\text{O}$ ):  $\delta$  = 175.8, 175.7, 103.7, 103.6, 101.9, 82.8, 78.9, 76.4, 75.7, 75.3, 74.3, 73.0, 70.8, 70.7, 70.5, 69.1, 61.8, 61.2, 60.6, 56.4, 55.9, 23.1, 23.0, 19.1; MALDI-TOF MS:  $[\text{M} + \text{Na}^+]$  C104H173N9O73Na, calcd 2738, found 2739.

**Gal $\beta$ 4GlcNAc $\beta$ 3Gal $\beta$ 4GlcNAc $\beta$ 3Gal $\beta$ 4GlcNAc $\beta$ 3Gal $\beta$ 4GlcNAc $\beta$ 6(Gal $\beta$ 4GlcNAc $\beta$ 3Gal $\beta$ 4GlcNAc $\beta$ 3Gal $\beta$ 4GlcNAc $\beta$ 3Gal $\beta$ 3)GalNAc $\alpha$ -Thr (37a).**

Compound **37f** (7 mg, 2.58  $\mu\text{mol}$ ) was treated with a mixture of 30 mU of GalT-1 and UDP-Gal (6.3 mg, 4.0 equiv.) in 520  $\mu\text{L}$  buffer (50 mM Tris-HCl buffer, pH 7.5, with 0.1 mg/mL BSA, 20 mM  $\text{MnCl}_2$ , 100 mU/mL of calf intestine alkaline phosphatase). The reaction mixture was incubated overnight at 37  $^\circ\text{C}$ . The insoluble precipitates were removed by centrifugation and the supernatant was concentrated, purified by Sephadex<sup>TM</sup> G-25 and lyophilized to give the final product as a white powder (7.5 mg, 95 % yield).  $^1\text{H}$  NMR (600 MHz,  $\text{D}_2\text{O}$ ):  $\delta$  = 4.95 – 4.90 (m, 1H), 4.72 – 4.64 (m, 6H), 4.55 (d,  $J$  = 8.2 Hz, 1H), 4.48 – 4.37 (m, 9H), 4.27 (d,  $J$  = 8.3 Hz, 1H), 4.21 – 4.06 (m, 9H), 4.02 – 3.49 (m, 87H), 2.03 (s, 3H), 2.02-2.01 (m, 18H), 2.01 (s, 3H), 1.35 (d,  $J$  = 6.8 Hz, 3H);  $^{13}\text{C}$  NMR (150 MHz,  $\text{D}_2\text{O}$ ):  $\delta$  = 175.7, 105.4, 103.6, 103.6, 103.6, 101.9, 82.9, 82.6, 79.2, 78.9, 77.2, 76.1, 75.7, 75.3, 73.6, 73.3, 73.0, 71.8, 70.7, 70.5, 70.0, 69.3, 69.1, 61.8, 61.8, 60.6, 56.0, 55.9, 55.7, 49.3, 23.1, 23.0; MALDI-TOF MS:  $[\text{M} + \text{Na}^+]$  C116H193N9O83Na, calcd 3062, found 3063.

**Neu5Ac $\alpha$ 3Gal $\beta$ 4GlcNAc $\beta$ 3Gal $\beta$ 4GlcNAc $\beta$ 3Gal $\beta$ 4GlcNAc $\beta$ 3Gal $\beta$ 4GlcNAc $\beta$ 6(Neu5Ac $\alpha$ 3Gal $\beta$ 4GlcNAc $\beta$ 3Gal $\beta$ 4GlcNAc $\beta$ 3Gal $\beta$ 4GlcNAc $\beta$ 3Gal $\beta$ 3)GalNAc $\alpha$ -Thr (37).**

Compound **37a** (0.4 mg, 0.13  $\mu\text{mol}$ ), CMP-Neu5Ac (0.4 mg, 4.0 equiv.), and rST3Gal-III (1 mU) were dissolved in 133  $\mu\text{L}$  buffer (50 mM Tris-HCl, pH 7.5, with 100 mU/mL of calf intestine alkaline phosphatase). After incubation overnight at 37  $^\circ\text{C}$ , the insoluble precipitates were removed by centrifugation and the supernatant was concentrated and purified by Sephadex<sup>TM</sup> G-25 and lyophilized to give the final product as a white powder (0.4 mg, 84 % yield).  $^1\text{H}$  NMR (600 MHz,  $\text{D}_2\text{O}$ ):  $\delta$  = 4.93 (s, 1H), 4.72 – 4.66 (m, 6H), 4.58 – 4.52 (m, 3H), 4.48 – 4.38 (m, 7H), 4.28 (d,  $J$  = 11.1 Hz, 1H), 4.20 – 4.06 (m, 12H), 4.02 – 3.46 (m, 98H), 2.74 (dd,  $J$  = 12.2, 4.2 Hz, 2H), 2.07 – 1.98 (m, 33H), 1.79 (t,  $J$  = 12.1 Hz, 2H), 1.35 (d,  $J$  = 6.5 Hz, 3H); MALDI-TOF MS: permethylated  $[\text{M-Thr} + \text{Na}^+]$  C194H340N10O97Na, calcd 4383, found 4384.6.

**Neu5Ac $\alpha$ 6Gal $\beta$ 4GlcNAc $\beta$ 3Gal $\beta$ 4GlcNAc $\beta$ 3Gal $\beta$ 4GlcNAc $\beta$ 3Gal $\beta$ 4GlcNAc $\beta$ 6(Neu5Ac $\alpha$ 6Gal $\beta$ 4GlcNAc $\beta$ 3Gal $\beta$ 4GlcNAc $\beta$ 3Gal $\beta$ 4GlcNAc $\beta$ 3Gal $\beta$ 3)GalNAc $\alpha$ -Thr (97).**

Compound **37a** (0.5 mg, 0.16  $\mu\text{mol}$ ), CMP-Neu5Ac (0.4 mg, 4.0 equiv.), and hST6Gal-I (1 mU) were dissolved in 109  $\mu\text{L}$  buffer (50 mM Tris-HCl, pH 7.5, with 100 mU/mL of calf intestine alkaline phosphatase). After incubation overnight at 37  $^\circ\text{C}$ , the insoluble precipitates were removed by centrifugation and the supernatant was concentrated and purified by Sephadex<sup>TM</sup> G-25 and lyophilized to give the final product as a white powder (0.5 mg, 85 % yield).  $^1\text{H}$  NMR (600 MHz,  $\text{D}_2\text{O}$ ):  $\delta$  = 4.92 (s, 1H), 4.73 – 4.66 (m, 6H), 4.55 (d,  $J$

= 7.9 Hz, 1H), 4.48 – 4.37 (m, 9H), 4.28 (d,  $J = 11.1$  Hz, 1H), 4.21 – 4.08 (m, 10H), 4.03 – 3.49 (m, 100H), 2.66 (dd,  $J = 12.3, 4.4$  Hz, 2H), 2.07 – 1.98 (m, 33H), 1.71 (t,  $J = 12.1$  Hz, 2H), 1.35 (d,  $J = 6.5$  Hz, 3H); MALDI-TOF MS: permethylated [M-Thr + Na<sup>+</sup>] C194H340N10O97Na, calcd 4383, found 4386.6.

**GlcNAc $\beta$ 3Gal $\beta$ 4GlcNAc $\beta$ 3Gal $\beta$ 4GlcNAc $\beta$ 3Gal $\beta$ 4GlcNAc $\beta$ 3Gal $\beta$ 4GlcNAc $\beta$ 6(GlcNAc $\beta$ 3Gal $\beta$ 4GlcNAc $\beta$ 3Gal $\beta$ 4GlcNAc $\beta$ 3Gal $\beta$ 4GlcNAc $\beta$ 3Gal $\beta$ 3)GalNAc $\alpha$ -Thr (37b).**

Compound **37a** (7.5 mg, 2.45  $\mu$ mol) was treated with a mixture of 25 mU of HP  $\beta$ 3GlcNAcT and UDP-GlcNAc (6.4 mg, 4.0 equiv.) in 490  $\mu$ L buffer (50 mM HEPES-NaOH buffer, pH 7.2, with 25 mM KCl, 1 mM DTT, 2 mM MnCl<sub>2</sub>, 100 mU/mL of calf intestine alkaline phosphatase). The reaction mixture was incubated overnight at 37 °C. The insoluble precipitates were removed by centrifugation and the supernatant was concentrated, purified by Sephadex<sup>TM</sup> G-25 and lyophilized to give the final product as a white powder (8.2 mg, 96 % yield). <sup>1</sup>H NMR (600 MHz, D<sub>2</sub>O):  $\delta = 4.93$  (s, 1H), 4.72 – 4.64 (m, 8H), 4.55 (d,  $J = 7.0$  Hz, 1H), 4.49 – 4.38 (m, 9H), 4.27 (d,  $J = 11.0$  Hz, 1H), 4.22 – 4.06 (m, 11H), 4.04 – 3.38 (m, 97H), 2.03 (s, 3H), 2.02-2.01 (m, 24H), 2.01 (s, 3H), 1.35 (d,  $J = 6.8$  Hz, 3H); MALDI-TOF MS: [M + Na<sup>+</sup>] C132H219N11O93Na, calcd 3468, found 3469.

**Gal $\beta$ 4GlcNAc $\beta$ 3Gal $\beta$ 4GlcNAc $\beta$ 3Gal $\beta$ 4GlcNAc $\beta$ 3Gal $\beta$ 4GlcNAc $\beta$ 3Gal $\beta$ 4GlcNAc $\beta$ 6(Gal $\beta$ 4GlcNAc $\beta$ 3Gal $\beta$ 4GlcNAc $\beta$ 3Gal $\beta$ 4GlcNAc $\beta$ 3Gal $\beta$ 4GlcNAc $\beta$ 3Gal $\beta$ 3)GalNAc $\alpha$ -Thr (38a).**

Compound **37b** (3.7 mg, 1.07  $\mu$ mol) was treated with a mixture of 20 mU of GalT-1 and UDP-Gal (2.6 mg, 4.0 equiv.) in 214  $\mu$ L buffer (50 mM Tris-HCl buffer, pH 7.5, with 0.1 mg/mL BSA, 20 mM MnCl<sub>2</sub>, 100 mU/mL of calf intestine alkaline phosphatase). The reaction mixture was incubated overnight at 37 °C. The insoluble precipitates were removed by centrifugation and the supernatant was concentrated, purified by Sephadex<sup>TM</sup> G-25 and lyophilized to give the final product as a white powder (3.9 mg, 96 % yield). <sup>1</sup>H NMR (600 MHz, D<sub>2</sub>O):  $\delta = 4.92$  (d,  $J = 3.9$  Hz, 1H), 4.72 – 4.64 (m, 8H), 4.55 (d,  $J = 8.2$  Hz, 1H), 4.50 – 4.36 (m, 11H), 4.27 (dd,  $J = 10.9, 3.2$  Hz, 1H), 4.20 – 4.06 (m, 11H), 4.03 – 3.48 (m, 109H), 2.08 – 1.96 (m, 30H), 1.35 (d,  $J = 6.8$  Hz, 3H); MALDI-TOF MS: [M + Na<sup>+</sup>] C144H239N11O103Na, calcd 3792, found 3795.

**Neu5Ac $\alpha$ 3Gal $\beta$ 4GlcNAc $\beta$ 6(Neu5Ac $\alpha$ 3Gal $\beta$ 4GlcNAc $\beta$ 3Gal $\beta$ 4GlcNAc $\beta$ 3Gal $\beta$ 4GlcNAc $\beta$ 3Gal $\beta$ 4GlcNAc $\beta$ 3Gal $\beta$ 3)GalNAc $\alpha$ -Thr (38).**

Compound **38a** (2 mg, 0.53  $\mu$ mol), CMP-Neu5Ac (1.4 mg, 4.0 equiv.), and rST3Gal-III (3 mU) were dissolved in 530  $\mu$ L buffer (50 mM Tris-HCl, pH 7.5, with 100 mU/mL of calf intestine alkaline phosphatase). After incubation overnight at 37 °C, the insoluble precipitates were removed by centrifugation and the supernatant was concentrated and purified by Sephadex<sup>TM</sup> G-25 and lyophilized to give the final product as a white powder (2 mg, 87 % yield). <sup>1</sup>H NMR (600 MHz, D<sub>2</sub>O):  $\delta = 4.93$  (d,  $J = 3.5$  Hz, 1H), 4.72 – 4.66 (m, 8H), 4.58 – 4.52 (m, 3H), 4.49 – 4.37 (m, 8H), 4.28 (d,  $J = 11.1$  Hz, 1H), 4.21 – 4.06 (m, 11H), 4.00 – 3.47 (m, 124H), 2.74 (dd,  $J = 12.5, 4.6$  Hz, 2H), 2.06 – 1.96 (m, 36H), 1.79 (t,  $J = 12.2$  Hz, 2H), 1.35 (d,  $J = 6.4$  Hz, 3H); MALDI-TOF MS: permethylated [M + H<sup>+</sup>] C241H424N13O119, calcd 5402, found 5405.2.

**Neu5Ac $\alpha$ 6Gal $\beta$ 4GlcNAc $\beta$ 3Gal $\beta$ 4GlcNAc $\beta$ 3Gal $\beta$ 4GlcNAc $\beta$ 3Gal $\beta$ 4GlcNAc $\beta$ 3Gal $\beta$ 4GlcNAc $\beta$ 6(Neu5Ac $\alpha$ 6Gal $\beta$ 4GlcNAc $\beta$ 3Gal $\beta$ 4GlcNAc $\beta$ 3Gal $\beta$ 4GlcNAc $\beta$ 3Gal $\beta$ 4GlcNAc $\beta$ 3Gal $\beta$ 3)GalNAc $\alpha$ -Thr (98).**

Compound **38a** (0.5 mg, 0.13  $\mu$ mol), CMP-Neu5Ac (0.4 mg, 4.0 equiv.), and hST6Gal-I (1.5 mU) were dissolved in 88  $\mu$ L buffer (50 mM Tris-HCl, pH 7.5, with 100 mU/mL of calf intestine alkaline phosphatase). After incubation overnight at 37 °C, the insoluble precipitates were removed by centrifugation and the supernatant was concentrated and purified by Sephadex<sup>TM</sup> G-25 and lyophilized to give the final product as a white powder (0.5 mg, 87 % yield). <sup>1</sup>H NMR (600 MHz, D<sub>2</sub>O):  $\delta = 4.93$  (s, 1H), 4.73 – 4.66 (m, 8H), 4.55 (d,  $J = 8.2$  Hz, 1H), 4.48 – 4.38 (m, 12H), 4.28 (d,  $J = 10.5$  Hz, 1H), 4.18 – 4.16 (m, 12H), 4.03 – 3.47 (m, 121H), 2.66 (dd,  $J = 12.2, 4.3$  Hz, 2H), 2.07 – 1.97 (m, 36H), 1.71 (t,  $J = 12.2$  Hz, 2H), 1.35 (d,  $J = 6.5$  Hz, 3H); MALDI-TOF MS: permethylated [M + H<sup>+</sup>] C241H424N13O119, calcd 5402, found 5405.6.

**GlcNAc $\beta$ 3Gal $\beta$ 4GlcNAc $\beta$ 3Gal $\beta$ 4GlcNAc $\beta$ 3GalNAc $\alpha$ -Thr (40b).**

Compound **40a** (5.1 mg, 4.85  $\mu$ mol) was treated with a mixture of 30 mU of HP  $\beta$ 3GlcNAcT and UDP-GlcNAc (6.3 mg, 2.0 equiv.) in 490  $\mu$ L buffer (50 mM HEPES-NaOH buffer, pH 7.2, with 25 mM KCl, 1 mM DTT, 2 mM MnCl<sub>2</sub>, 100 mU/mL of calf intestine alkaline phosphatase). The reaction mixture was incubated overnight at 37 °C. The insoluble precipitates were removed by centrifugation and the supernatant was concentrated, purified by Sephadex<sup>TM</sup> G-25 and lyophilized to give the final product as a white powder (5.6 mg, 92 % yield). <sup>1</sup>H NMR (600 MHz, D<sub>2</sub>O):  $\delta = 4.91$  (d,  $J = 3.8$  Hz, 1H), 4.69 – 4.64 (m, 2H), 4.58 (d,  $J = 7.9$  Hz, 1H), 4.47 – 4.40 (m, 3H), 4.21 (dd,  $J = 11.2, 3.8$  Hz, 1H), 4.18 (d,  $J = 3.3$  Hz, 1H), 4.14 (dd,  $J = 3.7, 1.6$  Hz, 2H), 4.04 (dd,

$J = 8.3, 4.9$  Hz, 1H), 3.97 – 3.90 (m, 3H), 3.90 – 3.85 (m, 1H), 3.85 – 3.65 (m, 21H), 3.60 – 3.52 (m, 5H), 3.50 – 3.40 (m, 2H), 2.05 (s, 3H), 2.02 (s, 3H), 2.01 (s, 3H), 2.00 (s, 2H), 1.39 (d,  $J = 6.7$  Hz, 3H);  $^{13}\text{C}$  NMR (150 MHz,  $\text{D}_2\text{O}$ ):  $\delta = 175.7, 175.6, 175.2, 174.5, 172.7, 103.6(9), 103.6(6), 103.5(5), 103.0, 99.9, 82.9, 82.8, 79.1, 78.9, 77.1, 76.4, 75.7, 75.4, 75.3, 75.3, 74.3, 73.0, 72.8, 71.8, 70.8, 70.7, 70.4, 69.5, 69.1, 69.1, 62.0, 61.7, 61.2, 60.6, 59.9, 56.4, 55.9(2), 55.8(5), 49.1, 23.1, 23.0(3), 22.9(5), 18.9$ ; MALDI-TOF MS:  $[\text{M}+\text{Na}^+]$  C48H81N5O33Na, calcd 1278, found 1278.

#### **Gal $\beta$ 4GlcNAc $\beta$ 3Gal $\beta$ 4GlcNAc $\beta$ 3Gal $\beta$ 4GlcNAc $\beta$ 3GalNAc $\alpha$ -Thr (41a).**

Compound **40b** (102 mg, 80  $\mu\text{mol}$ ) was treated with a mixture of 360 mU of GalT-1 and UDP-Gal (98 mg, 2.0 equiv.) in 8 mL buffer (50 mM Tris-HCl buffer, pH 7.5, with 0.1 mg/mL BSA, 20 mM  $\text{MnCl}_2$ , 100 mU/mL of calf intestine alkaline phosphatase). The reaction mixture was incubated overnight at 37 °C. The insoluble precipitates were removed by centrifugation and the supernatant was concentrated, purified by Sephadex<sup>TM</sup> G-25 and lyophilized to give the final product as a white powder (105 mg, 91 % yield).  $^1\text{H}$  NMR (600 MHz,  $\text{D}_2\text{O}$ ):  $\delta = 4.91$  (d,  $J = 3.8$  Hz, 1H), 4.70 - 4.66 (m, 2H), 4.59 (d,  $J = 8.0$  Hz, 1H), 4.49 – 4.39 (m, 4H), 4.21 (dd,  $J = 11.2, 3.7$  Hz, 1H), 4.19 – 4.17 (m, 1H), 4.14 (d,  $J = 2.8$  Hz, 2H), 4.08 – 4.01 (m, 1H), 3.97 - 3.90 (m, 5H), 3.86 – 3.63 (m, 27H), 3.61 – 3.50 (m, 6H), 2.05 (s, 3H), 2.04 – 2.01 (m, 6H), 2.00 (s, 3H), 1.39 (d,  $J = 6.7$  Hz, 3H); MALDI-TOF MS:  $[\text{M}+\text{Na}^+]$  C54H91N5O38Na, calcd 1440, found 1440.

#### **Neu5Ac $\alpha$ 3Gal $\beta$ 4GlcNAc $\beta$ 3Gal $\beta$ 4GlcNAc $\beta$ 3Gal $\beta$ 4GlcNAc $\beta$ 3GalNAc $\alpha$ -Thr (41).**

Compound **41a** (2 mg, 1.4  $\mu\text{mol}$ ), CMP-Neu5Ac (2 mg, 2.0 equiv.), and rST3Gal-III (8 mU) were dissolved in 700  $\mu\text{L}$  buffer (50 mM Tris-HCl, pH 7.5, with 100 mU/mL of calf intestine alkaline phosphatase). After incubation overnight at 37 °C, the insoluble precipitates were removed by centrifugation and the supernatant was concentrated and purified by Sephadex<sup>TM</sup> G-25 and lyophilized to give the final product as a white powder (2.1 mg, 88 % yield).  $^1\text{H}$  NMR (600 MHz,  $\text{D}_2\text{O}$ ):  $\delta = 4.91$  (d,  $J = 4.3$  Hz, 1H), 4.70 – 4.66 (m, 2H), 4.58 (d,  $J = 7.7$  Hz, 1H), 4.54 (d,  $J = 7.7$  Hz, 1H), 4.48 – 4.41 (m, 3H), 4.24 – 4.17 (m, 2H), 4.16 – 4.12 (m, 2H), 4.10 (dd,  $J = 9.9, 3.3$  Hz, 1H), 4.04 (t,  $J = 6.2$  Hz, 1H), 3.98 – 3.90 (m, 5H), 3.90 – 3.49 (m, 39H), 2.74 (dd,  $J = 12.3, 4.6$  Hz, 1H), 2.08 – 1.94 (m, 15H), 1.78 (t,  $J = 12.0$  Hz, 1H), 1.39 (d,  $J = 6.8$  Hz, 3H); MALDI-TOF MS: permethylated  $[\text{M} + \text{Na}^+]$  C95H168N6O46Na, calcd 2151, found 2151.9.

#### **Neu5Ac $\alpha$ 6Gal $\beta$ 4GlcNAc $\beta$ 3Gal $\beta$ 4GlcNAc $\beta$ 3Gal $\beta$ 4GlcNAc $\beta$ 3GalNAc $\alpha$ -Thr (101).**

Compound **41a** (0.5 mg, 0.353  $\mu\text{mol}$ ), CMP-Neu5Ac (0.5 mg, 2.0 equiv.), and hST6Gal-I (1 mU) were dissolved in 118  $\mu\text{L}$  buffer (50 mM Tris-HCl, pH 7.5, with 100 mU/mL of calf intestine alkaline phosphatase). After incubation overnight at 37 °C, the insoluble precipitates were removed by centrifugation and the supernatant was concentrated and purified by Sephadex<sup>TM</sup> G-25 and lyophilized to give the final product as a white powder (0.5 mg, 83 % yield).  $^1\text{H}$  NMR (600 MHz,  $\text{D}_2\text{O}$ ):  $\delta = 4.92$  (d,  $J = 4.2$  Hz, 1H), 4.71 (d,  $J = 7.7$  Hz, 1H), 4.68 (d,  $J = 8.7$  Hz, 1H), 4.59 (d,  $J = 7.7$  Hz, 1H), 4.49 – 4.39 (m, 4H), 4.26 – 4.17 (m, 2H), 4.16 – 4.13 (m, 2H), 4.05 (dd,  $J = 7.8, 4.8$  Hz, 1H), 4.02 – 3.46 (m, 45H), 2.66 (dd,  $J = 12.2, 4.8$  Hz, 1H), 2.07 – 1.97 (m, 15H), 1.71 (t,  $J = 12.3$  Hz, 1H), 1.39 (d,  $J = 6.7$  Hz, 3H); MALDI-TOF MS: permethylated  $[\text{M}-\text{Thr} + \text{Na}^+]$  C89H157N5O44Na, calcd 2022, found 2022.8.

#### **GlcNAc $\beta$ 3Gal $\beta$ 4GlcNAc $\beta$ 3Gal $\beta$ 4GlcNAc $\beta$ 3Gal $\beta$ 4GlcNAc $\beta$ 3GalNAc $\alpha$ -Thr (41b).**

Compound **41a** (74 mg, 52.2  $\mu\text{mol}$ ) was treated with a mixture of 150 mU of HP  $\beta$ 3GlcNAcT and UDP-GlcNAc (68 mg, 2.0 equiv.) in 5.22 mL buffer (50 mM HEPES-NaOH buffer, pH 7.2, with 25 mM KCl, 1 mM DTT, 2 mM  $\text{MnCl}_2$ , 100 mU/mL of calf intestine alkaline phosphatase). The reaction mixture was incubated overnight at 37 °C. The insoluble precipitates were removed by centrifugation and the supernatant was concentrated, purified by Sephadex<sup>TM</sup> G-25 and lyophilized to give the final product as a white powder (80 mg, 93 % yield).  $^1\text{H}$  NMR (600 MHz,  $\text{D}_2\text{O}$ ):  $\delta = 4.92$  (d,  $J = 3.9$  Hz, 1H), 4.72 – 4.64 (m, 3H), 4.59 (d,  $J = 8.0$  Hz, 1H), 4.49 – 4.39 (m, 4H), 4.21 (dd,  $J = 11.1, 3.8$  Hz, 1H), 4.18 (d,  $J = 3.5$  Hz, 1H), 4.16 – 4.12 (m, 3H), 4.05 (dd,  $J = 8.4, 4.9$  Hz, 1H), 3.96 – 3.90 (m, 4H), 3.90 – 3.86 (m, 1H), 3.85 – 3.66 (m, 29H), 3.61 – 3.51 (m, 7H), 3.48 – 3.41 (m, 2H), 2.05 (s, 3H), 2.02 (s, 3H), 2.01 (s, 6H), 2.00 (s, 3H), 1.39 (d,  $J = 6.7$  Hz, 3H); MALDI-TOF MS:  $[\text{M}+\text{Na}^+]$  C62H104N6O43Na, calcd 1643, found 1644.

#### **Gal $\beta$ 4GlcNAc $\beta$ 3Gal $\beta$ 4GlcNAc $\beta$ 3Gal $\beta$ 4GlcNAc $\beta$ 3Gal $\beta$ 4GlcNAc $\beta$ 3GalNAc $\alpha$ -Thr (42a).**

Compound **41b** (42 mg, 25.9  $\mu\text{mol}$ ) was treated with a mixture of 150 mU of GalT-1 and UDP-Gal (32 mg, 2.0 equiv.) in 2.6 mL buffer (50 mM Tris-HCl buffer, pH 7.5, with 0.1 mg/mL BSA, 20 mM  $\text{MnCl}_2$ , 100 mU/mL of calf intestine alkaline phosphatase). The reaction mixture was incubated overnight at 37 °C. The insoluble



precipitates were removed by centrifugation and the supernatant was concentrated, purified by Sephadex™ G-25 and lyophilized to give the final product as a white powder (45 mg, 96 % yield). <sup>1</sup>H NMR (600 MHz, D<sub>2</sub>O): δ = 4.92 (d, *J* = 4.1 Hz, 1H), 4.72 – 4.62 (m, 3H), 4.60 – 4.50 (m, 2H), 4.49 – 4.40 (m, 4H), 4.23 – 4.16 (m, 2H), 4.17 – 4.10 (m, 3H), 4.06 – 3.99 (m, 2H), 3.96 – 3.88 (m, 6H), 3.86 – 3.61 (m, 34H), 3.61 – 3.48 (m, 8H), 2.03 (s, 3H), 2.02 – 2.00 (m, 6H), 1.99 (s, 3H), 1.41 (d, *J* = 6.8 Hz, 3H); MALDI-TOF MS: [M+Na<sup>+</sup>] C<sub>68</sub>H<sub>114</sub>N<sub>6</sub>O<sub>48</sub>Na, calcd 1805, found 1805.

#### **Neu5Acα3Galβ4GlcNAcβ3Galβ4GlcNAcβ3Galβ4GlcNAcβ3Galβ4GlcNAcβ3GalNAcα-Thr (42).**

Compound **42a** (2 mg, 1.1 μmol), CMP-Neu5Ac (1.5 mg, 2.0 equiv.), and rST3Gal-III (10 mU) were dissolved in 550 μL buffer (50 mM Tris-HCl, pH 7.5, with 100 mU/mL of calf intestine alkaline phosphatase). After incubation overnight at 37 °C, the insoluble precipitates were removed by centrifugation and the supernatant was concentrated and purified by Sephadex™ G-25 and lyophilized to give the final product as a white powder (2.1 mg, 91 % yield).

<sup>1</sup>H NMR (600 MHz, D<sub>2</sub>O): δ = 4.92 (d, *J* = 4.3 Hz, 1H), 4.73 – 4.66 (m, 3H), 4.58 (d, *J* = 7.9 Hz, 1H), 4.54 (d, *J* = 8.0 Hz, 1H), 4.48 – 4.41 (m, 4H), 4.26 – 4.17 (m, 2H), 4.17 – 4.12 (m, 3H), 4.10 (dd, *J* = 9.7, 3.1 Hz, 1H), 4.04 (dd, *J* = 8.2, 4.7 Hz, 1H), 3.97 – 3.90 (m, 6H), 3.90 – 3.60 (m, 39H), 3.60 – 3.50 (m, 10H), 2.74 (dd, *J* = 12.4, 4.6 Hz, 1H), 2.07 – 1.95 (m, 18H), 1.79 (t, *J* = 12.3 Hz, 1H), 1.39 (d, *J* = 6.8 Hz, 3H); MALDI-TOF MS: permethylated [M-Thr + Na<sup>+</sup>] C<sub>109</sub>H<sub>192</sub>N<sub>6</sub>O<sub>54</sub>Na, calcd 2471, found 2471.9.

#### **Neu5Acα6Galβ4GlcNAcβ3Galβ4GlcNAcβ3Galβ4GlcNAcβ3Galβ4GlcNAcβ3GalNAcα-Thr (102).**

Compound **42a** (0.5 mg, 0.277 μmol), CMP-Neu5Ac (0.4 mg, 2.0 equiv.), and hST6Gal-I (0.8 mU) were dissolved in 92 μL buffer (50 mM Tris-HCl, pH 7.5, with 100 mU/mL of calf intestine alkaline phosphatase). After incubation overnight at 37 °C, the insoluble precipitates were removed by centrifugation and the supernatant was concentrated and purified by Sephadex™ G-25 and lyophilized to give the final product as a white powder (0.5 mg, 86 % yield). <sup>1</sup>H NMR (600 MHz, D<sub>2</sub>O): δ = 4.92 (d, *J* = 3.6 Hz, 1H), 4.73 – 4.66 (m, 3H), 4.59 (d, *J* = 7.6 Hz, 1H), 4.48 – 4.41 (m, 5H), 4.24 – 4.17 (m, 2H), 4.16 – 4.13 (m, 3H), 4.05 (dd, *J* = 7.8, 4.7 Hz, 1H), 4.01 – 3.48 (m, 56H), 2.66 (dd, *J* = 12.3, 4.5 Hz, 1H), 2.08 – 1.96 (m, 18H), 1.71 (t, *J* = 12.1 Hz, 1H), 1.39 (d, *J* = 6.6 Hz, 3H); MALDI-TOF MS: permethylated [M-Thr + Na<sup>+</sup>] C<sub>109</sub>H<sub>192</sub>N<sub>6</sub>O<sub>54</sub>Na, calcd 2471, found 2471.9.

#### **GlcNAcβ3Galβ4GlcNAcβ3Galβ4GlcNAcβ3Galβ4GlcNAcβ3Galβ4GlcNAcβ3GalNAcα-Thr (42b).**

Compound **42a** (10 mg, 5.54 μmol) was treated with a mixture of 15 mU of HP β3GlcNAcT and UDP-GlcNAc (7.2 mg, 2.0 equiv.) in 0.554 mL buffer (50 mM HEPES-NaOH buffer, pH 7.2, with 25 mM KCl, 1 mM DTT, 2 mM MnCl<sub>2</sub>, 100 mU/mL of calf intestine alkaline phosphatase). The reaction mixture was incubated overnight at 37 °C. The insoluble precipitates were removed by centrifugation and the supernatant was concentrated, purified by Sephadex™ G-25 and lyophilized to give the final product as a white powder (10 mg, 90 % yield). <sup>1</sup>H NMR (600 MHz, D<sub>2</sub>O): δ = 4.91 (d, *J* = 3.9 Hz, 1H), 4.72 – 4.64 (m, 4H), 4.59 (d, *J* = 8.0 Hz, 1H), 4.48 – 4.42 (m, 4H), 4.38 (dd, *J* = 6.7, 2.6 Hz, 1H), 4.25 – 4.15 (m, 2H), 4.14 (d, *J* = 3.6 Hz, 4H), 4.05 (dd, *J* = 8.5, 4.8 Hz, 1H), 3.97 – 3.91 (m, 5H), 3.91 – 3.64 (m, 38H), 3.63 – 3.51 (m, 9H), 3.51 – 3.39 (m, 2H), 2.05 (s, 3H), 2.02 (m, 12H), 2.00 (s, 3H), 1.38 (d, *J* = 6.7 Hz, 3H); MALDI-TOF MS: [M+Na<sup>+</sup>] C<sub>76</sub>H<sub>127</sub>N<sub>7</sub>O<sub>53</sub>Na, calcd 2008, found 2008.

#### **Galβ4GlcNAcβ3Galβ4GlcNAcβ3Galβ4GlcNAcβ3Galβ4GlcNAcβ3Galβ4GlcNAcβ3GalNAcα-Thr (43a).**

Compound **42b** (9 mg, 4.48 μmol) was treated with a mixture of 15 mU of GalT-1 and UDP-Gal (5.6 mg, 2.0 equiv.) in 0.458 mL buffer (50 mM Tris-HCl buffer, pH 7.5, with 0.1 mg/mL BSA, 20 mM MnCl<sub>2</sub>, 100 mU/mL of calf intestine alkaline phosphatase). The reaction mixture was incubated overnight at 37 °C. The insoluble precipitates were removed by centrifugation and the supernatant was concentrated, purified by Sephadex™ G-25 and lyophilized to give the final product as a white powder (9 mg, 93 % yield). <sup>1</sup>H NMR (600 MHz, D<sub>2</sub>O): δ = 4.91 (d, *J* = 3.9 Hz, 1H), 4.71 – 4.65 (m, 4H), 4.58 (d, *J* = 8.0 Hz, 1H), 4.51 – 4.39 (m, 6H), 4.21 (dd, *J* = 11.2, 3.8 Hz, 1H), 4.19 – 4.17 (m, 1H), 4.14 (d, *J* = 3.5 Hz, 4H), 4.04 (dd, *J* = 7.9, 5.2 Hz, 1H), 3.98 – 3.89 (m, 7H), 3.87 – 3.61 (m, 44H), 3.61 – 3.49 (m, 9H), 2.05 (s, 3H), 2.04 – 2.01 (m, 12H), 2.00 (s, 3H), 1.39 (d, *J* = 6.7 Hz, 3H); MALDI-TOF MS, [M+Na<sup>+</sup>] C<sub>82</sub>H<sub>137</sub>N<sub>7</sub>O<sub>58</sub>Na, calcd 2170, found 2170.

#### **Neu5Acα3Galβ4GlcNAcβ3Galβ4GlcNAcβ3Galβ4GlcNAcβ3Galβ4GlcNAcβ3Galβ4GlcNAcβ3GalNAcα-Thr (43).**

Compound **43a** (2.2 mg, 1.0  $\mu\text{mol}$ ), CMP-Neu5Ac (1.3 mg, 2.0 equiv.), and rST3Gal-III (3 mU) were dissolved in 333  $\mu\text{L}$  buffer (50 mM Tris-HCl, pH 7.5, with 100 mU/mL of calf intestine alkaline phosphatase). After incubation overnight at 37  $^{\circ}\text{C}$ , the insoluble precipitates were removed by centrifugation and the supernatant was concentrated and purified by Sephadex<sup>TM</sup> G-25 and lyophilized to give the final product as a white powder (2.3 mg, 93 % yield). <sup>1</sup>H NMR (600 MHz, D<sub>2</sub>O):  $\delta$  = 4.92 (d,  $J$  = 3.9 Hz, 1H), 4.71 – 4.65 (d,  $J$  = 8.2 Hz, 4H), 4.58 (d,  $J$  = 8.2 Hz, 1H), 4.54 (d,  $J$  = 7.9 Hz, 1H), 4.48 – 4.41 (m, 5H), 4.25 – 4.17 (m, 2H), 4.17 – 4.13 (m, 4H), 4.10 (dd,  $J$  = 9.8, 3.0 Hz, 1H), 4.04 (dd,  $J$  = 8.1, 4.9 Hz, 1H), 3.98 – 3.90 (m, 7H), 3.90 – 3.60 (m, 48H), 3.60 – 3.51 (m, 11H), 2.74 (dd,  $J$  = 12.2, 4.5 Hz, 1H), 2.08 – 1.95 (m, 21H), 1.79 (t,  $J$  = 12.2 Hz, 1H), 1.39 (d,  $J$  = 6.7 Hz, 3H); <sup>13</sup>C NMR (150 MHz, D<sub>2</sub>O):  $\delta$  = 175.7, 103.7, 103.6, 103.3, 103.0, 100.5, 100.0, 82.8, 79.1, 78.9, 78.7, 77.0, 76.3, 76.0, 75.7, 75.3, 75.3, 73.7, 72.9, 72.5, 71.8, 70.7, 70.2, 69.5, 69.1, 68.9, 63.4, 62.0, 61.7, 60.6, 59.7, 55.9, 52.5, 49.1, 23.1, 23.0(2), 22.9(5), 22.8, 18.9; MALDI-TOF MS: permethylated [M-Thr + Na<sup>+</sup>] C129H227N7O64Na, calcd 2920, found 2921.0.

#### **Neu5Ac $\alpha$ 6Gal $\beta$ 4GlcNAc $\beta$ 3Gal $\beta$ 4GlcNAc $\beta$ 3Gal $\beta$ 4GlcNAc $\beta$ 3Gal $\beta$ 4GlcNAc $\beta$ 3Gal $\beta$ 4GlcNAc $\beta$ 3GalNAc $\alpha$ -Thr (103).**

Compound **43a** (0.5 mg, 0.23  $\mu\text{mol}$ ), CMP-Neu5Ac (0.3 mg, 2.0 equiv.), and hST6Gal-I (0.8 mU) were dissolved in 77  $\mu\text{L}$  buffer (50 mM Tris-HCl, pH 7.5, with 100 mU/mL of calf intestine alkaline phosphatase). After incubation overnight at 37  $^{\circ}\text{C}$ , the insoluble precipitates were removed by centrifugation and the supernatant was concentrated and purified by Sephadex<sup>TM</sup> G-25 and lyophilized to give the final product as a white powder (0.5 mg, 88 % yield). <sup>1</sup>H NMR (600 MHz, D<sub>2</sub>O):  $\delta$  = 4.92 (d,  $J$  = 3.5 Hz, 1H), 4.73 – 4.66 (m, 4H), 4.59 (d,  $J$  = 7.1 Hz, 1H), 4.48 – 4.41 (m, 6H), 4.26 – 4.17 (m, 2H), 4.17 – 4.13 (m, 4H), 4.05 (dd,  $J$  = 7.9, 5.0 Hz, 1H), 4.02 – 3.60 (m, 55H), 3.62 – 3.48 (m, 12H), 2.66 (dd,  $J$  = 12.3, 4.6 Hz, 1H), 2.08 – 1.95 (m, 21H), 1.71 (t,  $J$  = 12.2 Hz, 1H), 1.39 (d,  $J$  = 6.6 Hz, 3H); MALDI-TOF MS: permethylated [M-Thr + Na<sup>+</sup>] C129H227N7O64Na, calcd 2920, found 2921.1.

#### **GlcNAc $\beta$ 3Gal $\beta$ 4GlcNAc $\beta$ 3Gal $\beta$ 4GlcNAc $\beta$ 3(GlcNAc $\beta$ 3Gal $\beta$ 4GlcNAc $\beta$ 3Gal $\beta$ 4GlcNAc $\beta$ 6)GalNAc $\alpha$ -Thr (45b).**

Compound **45a** (33 mg, 18.5  $\mu\text{mol}$ ) was treated with a mixture of 15 mU of HP  $\beta$ 3GlcNAcT and UDP-GlcNAc (36 mg, 3.0 equiv.) in 3.7 mL buffer (50 mM HEPES-NaOH buffer, pH 7.2, with 25 mM KCl, 1 mM DTT, 2 mM MnCl<sub>2</sub>, 100 mU/mL of calf intestine alkaline phosphatase). The reaction mixture was incubated overnight at 37  $^{\circ}\text{C}$ . The insoluble precipitates were removed by centrifugation and the supernatant was concentrated, purified by Sephadex<sup>TM</sup> G-25 and lyophilized to give the final product as a white powder (35 mg, 95 % yield). <sup>1</sup>H NMR (600 MHz, D<sub>2</sub>O):  $\delta$  = 4.89 (d,  $J$  = 4.3 Hz, 1H), 4.72 – 4.65 (m, 4H), 4.61 – 4.53 (m, 2H), 4.48 – 4.42 (m, 4H), 4.37 (dd,  $J$  = 6.7, 2.6 Hz, 1H), 4.21 (dd,  $J$  = 11.2, 3.8 Hz, 1H), 4.18 (d,  $J$  = 3.3 Hz, 1H), 4.15 (dd,  $J$  = 3.7, 1.6 Hz, 5H), 4.09 (d,  $J$  = 9.4 Hz, 1H), 4.02 – 3.64 (m, 45H), 3.63 – 3.49 (m, 10H), 3.50 – 3.38 (m, 4H), 2.05 (s, 3H), 2.03 (s, 3H), 2.02 (s, 12H), 1.99 (s, 3H), 1.34 (d,  $J$  = 6.8 Hz, 3H); <sup>13</sup>C NMR (150 MHz, D<sub>2</sub>O):  $\delta$  = 175.7(4), 175.6(9), 175.2, 175.0, 174.5, 103.7, 103.6, 103.0, 101.8, 100.0, 82.9, 82.8, 79.1, 79.1, 78.9, 76.8, 76.4, 75.7, 75.6, 75.3(3), 75.2(6), 74.3, 73.6, 73.0, 72.8, 70.8(4), 70.7(8), 70.7(2), 70.5, 70.4, 69.9, 69.1(1), 69.0(6), 61.8, 61.2, 60.8, 60.6, 59.9, 56.4, 55.9, 55.8, 55.7, 49.0, 23.1(1), 23.0(7), 23.0(2), 22.9(5), 19.1; MALDI-TOF MS: [M+Na<sup>+</sup>] C84H140N8O58Na, calcd 2211, found 2212.

#### **Gal $\beta$ 4GlcNAc $\beta$ 3Gal $\beta$ 4GlcNAc $\beta$ 3Gal $\beta$ 4GlcNAc $\beta$ 3(Gal $\beta$ 4GlcNAc $\beta$ 3Gal $\beta$ 4GlcNAc $\beta$ 3Gal $\beta$ 4GlcNAc $\beta$ 6)GalNAc $\alpha$ -Thr (46a).**

Compound **45b** (18 mg, 8.22  $\mu\text{mol}$ ) was treated with a mixture of 100 mU of GalT-1 and UDP-Gal (20 mg, 4.0 equiv.) in 0.822 mL buffer (50 mM Tris-HCl buffer, pH 7.5, with 0.1 mg/mL BSA, 20 mM MnCl<sub>2</sub>, 100 mU/mL of calf intestine alkaline phosphatase). The reaction mixture was incubated overnight at 37  $^{\circ}\text{C}$ . The insoluble precipitates were removed by centrifugation and the supernatant was concentrated, purified by Sephadex<sup>TM</sup> G-25 and lyophilized to give the final product as a white powder (19 mg, 91 % yield). <sup>1</sup>H NMR (600 MHz, D<sub>2</sub>O):  $\delta$  = 4.88 (d,  $J$  = 4.3 Hz, 1H), 4.71 – 4.66 (m, 4H), 4.60 – 4.53 (m, 2H), 4.48 – 4.42 (m, 6H), 4.34 (d,  $J$  = 5.8 Hz, 1H), 4.22 – 4.06 (m, 8H), 4.03 – 3.90 (m, 9H), 3.86 – 3.63 (m, 50H), 3.62–3.50 (m, 12H), 2.05 (s, 3H), 2.03 (s, 3H), 2.02 (s, 12H), 2.00 (s, 3H), 1.33 (d,  $J$  = 6.6 Hz, 3H); <sup>13</sup>C NMR (150 MHz, D<sub>2</sub>O):  $\delta$  = 175.7, 103.7, 103.6, 82.9, 78.9, 76.1, 75.7, 75.3, 73.3, 73.0, 71.7, 70.7, 69.3, 69.1, 61.8(2), 61.7(5), 60.6, 56.0, 23.0; MALDI-TOF MS: [M+Na<sup>+</sup>] C96H160N8O68Na, calcd 2535, found 2537.



**Neu5Ac $\alpha$ 3Gal $\beta$ 4GlcNAc $\beta$ 3Gal $\beta$ 4GlcNAc $\beta$ 3Gal $\beta$ 4GlcNAc $\beta$ 3(Neu5Ac $\alpha$ 3Gal $\beta$ 4GlcNAc $\beta$ 3Gal $\beta$ 4GlcNAc $\beta$ 3Gal $\beta$ 4GlcNAc $\beta$ 6)GalNAc $\alpha$ -Thr (46).**

Compound **46a** (2 mg, 0.8  $\mu$ mol), CMP-Neu5Ac (2.1 mg, 4.0 equiv.), and rST3Gal-III (8 mU) were dissolved in 800  $\mu$ L buffer (50 mM Tris-HCl, pH 7.5, with 100 mU/mL of calf intestine alkaline phosphatase). After incubation overnight at 37  $^{\circ}$ C, the insoluble precipitates were removed by centrifugation and the supernatant was concentrated and purified by Sephadex<sup>TM</sup> G-25 and lyophilized to give the final product as a white powder (2.2 mg, 88 % yield). <sup>1</sup>H NMR (600 MHz, D<sub>2</sub>O):  $\delta$  = 4.90 (d,  $J$  = 3.7 Hz, 1H), 4.72 – 4.66 (m, 4H), 4.62 – 4.53 (m, 4H), 4.50 – 4.43 (m, 4H), 4.42 – 3.97 (m, 1H), 4.24 – 4.17 (m, 2H), 4.17 – 4.14 (m, 5H), 4.14 – 4.08 (m, 3H), 4.03 – 3.48 (m, 83H), 2.81 – 2.73 (m, 2H), 2.10 – 1.95 (m, 27H), 1.80 (t,  $J$  = 12.1 Hz, 2H), 1.36 (d,  $J$  = 6.7 Hz, 3H); MALDI-TOF MS: permethylated [M-Thr + Na<sup>+</sup>] C165H289N9O82Na, calcd 3730, found 3731.3.

**Neu5Ac $\alpha$ 6Gal $\beta$ 4GlcNAc $\beta$ 3Gal $\beta$ 4GlcNAc $\beta$ 3Gal $\beta$ 4GlcNAc $\beta$ 3(Neu5Ac $\alpha$ 6Gal $\beta$ 4GlcNAc $\beta$ 3Gal $\beta$ 4GlcNAc $\beta$ 3Gal $\beta$ 4GlcNAc $\beta$ 6)GalNAc $\alpha$ -Thr (106).**

Compound **46a** (0.5 mg, 0.2  $\mu$ mol), CMP-Neu5Ac (0.55 mg, 4.0 equiv.), and hST6Gal-I (1.5 mU) were dissolved in 133  $\mu$ L buffer (50 mM Tris-HCl, pH 7.5, with 100 mU/mL of calf intestine alkaline phosphatase). After incubation overnight at 37  $^{\circ}$ C, the insoluble precipitates were removed by centrifugation and the supernatant was concentrated and purified by Sephadex<sup>TM</sup> G-25 and lyophilized to give the final product as a white powder (0.55 mg, 89 % yield). <sup>1</sup>H NMR (600 MHz, D<sub>2</sub>O):  $\delta$  = 4.89 (s, 1H), 4.73 – 4.65 (m, 4H), 4.61 – 4.53 (m, 2H), 4.49 – 4.43 (m, 6H), 4.42 – 4.35 (m, 1H), 4.25 – 4.17 (m, 2H), 4.17 – 4.12 (m, 5H), 4.12 – 4.07 (m, 1H), 4.03 – 3.45 (m, 85H), 2.66 (dd,  $J$  = 12.6, 4.8 Hz, 2H), 2.08 – 1.94 (m, 27H), 1.71 (t,  $J$  = 12.1 Hz, 2H), 1.34 (d,  $J$  = 6.7 Hz, 3H); MALDI-TOF MS: permethylated [M-Thr + Na<sup>+</sup>] C165H289N9O82Na, calcd 3730, found 3731.4.

**GlcNAc $\beta$ 3Gal $\beta$ 4GlcNAc $\beta$ 3Gal $\beta$ 4GlcNAc $\beta$ 3Gal $\beta$ 4GlcNAc $\beta$ 3(GlcNAc $\beta$ 3Gal $\beta$ 4GlcNAc $\beta$ 3Gal $\beta$ 4GlcNAc $\beta$ 3Gal $\beta$ 4GlcNAc $\beta$ 6)GalNAc $\alpha$ -Thr (46b).**

Compound **46a** (45 mg, 17.9  $\mu$ mol) was treated with a mixture of 100 mU of HP  $\beta$ 3GlcNAcT and UDP-GlcNAc (47 mg, 4.0 equiv.) in 3.6 mL buffer (50 mM HEPES-NaOH buffer, pH 7.2, with 25 mM KCl, 1 mM DTT, 2 mM MnCl<sub>2</sub>, 100 mU/mL of calf intestine alkaline phosphatase). The reaction mixture was incubated overnight at 37  $^{\circ}$ C. The insoluble precipitates were removed by centrifugation and the supernatant was concentrated, purified by Sephadex<sup>TM</sup> G-25 and lyophilized to give the final product as a white powder (50 mg, 95 % yield). <sup>1</sup>H NMR (600 MHz, D<sub>2</sub>O):  $\delta$  = 4.88 (d,  $J$  = 4.1 Hz, 1H), 4.72 – 4.63 (m, 6H), 4.60 – 4.52 (m, 2H), 4.45 (t,  $J$  = 6.2 Hz, 7H), 4.36 (dd,  $J$  = 6.6, 2.4 Hz, 1H), 4.22 – 4.16 (m, 2H), 4.14 (d,  $J$  = 3.7 Hz, 7H), 4.09 (d,  $J$  = 9.4 Hz, 1H), 4.04 – 3.62 (m, 62H), 3.63 – 3.50 (m, 14H), 3.50 – 3.39 (m, 4H), 2.07 – 1.98 (m, 27H), 1.34 (d,  $J$  = 6.7 Hz, 3H); MALDI-TOF MS: [M+Na<sup>+</sup>] C112H186N10O78Na, calcd 2941, found 2942.

**Gal $\beta$ 4GlcNAc $\beta$ 3Gal $\beta$ 4GlcNAc $\beta$ 3Gal $\beta$ 4GlcNAc $\beta$ 3Gal $\beta$ 4GlcNAc $\beta$ 3(Gal $\beta$ 4GlcNAc $\beta$ 3Gal $\beta$ 4GlcNAc $\beta$ 3Gal $\beta$ 4GlcNAc $\beta$ 3Gal $\beta$ 4GlcNAc $\beta$ 6)GalNAc $\alpha$ -Thr (47a).**

Compound **46b** (40 mg, 13.7  $\mu$ mol) was treated with a mixture of 150 mU of GalT-1 and UDP-Gal (34 mg, 4.0 equiv.) in 2.7 mL buffer (50 mM Tris-HCl buffer, pH 7.5, with 0.1 mg/mL BSA, 20 mM MnCl<sub>2</sub>, 100 mU/mL of calf intestine alkaline phosphatase). The reaction mixture was incubated overnight at 37  $^{\circ}$ C. The insoluble precipitates were removed by centrifugation and the supernatant was concentrated, purified by Sephadex<sup>TM</sup> G-25 and lyophilized to give the final product as a white powder (40 mg, 90 % yield). <sup>1</sup>H NMR (600 MHz, D<sub>2</sub>O):  $\delta$  = 4.88 (d,  $J$  = 4.0 Hz, 1H), 4.73 – 4.64 (m, 6H), 4.60 – 4.52 (m, 2H), 4.50 – 4.41 (m, 8H), 4.36 – 4.30 (m, 1H), 4.23 – 4.05 (m, 10H), 4.01 – 3.88 (m, 11H), 3.88 – 3.62 (m, 66H), 3.61 – 3.48 (m, 16H), 2.10 – 1.93 (m, 27H), 1.33 (d,  $J$  = 6.6 Hz, 3H); MALDI-TOF MS: [M+Na<sup>+</sup>] C124H206N10O88Na, calcd 3265, found 3266.

**Neu5Ac $\alpha$ 3Gal $\beta$ 4GlcNAc $\beta$ 3Gal $\beta$ 4GlcNAc $\beta$ 3Gal $\beta$ 4GlcNAc $\beta$ 3Gal $\beta$ 4GlcNAc $\beta$ 3(Neu5Ac $\alpha$ 3Gal $\beta$ 4GlcNAc $\beta$ 3Gal $\beta$ 4GlcNAc $\beta$ 3Gal $\beta$ 4GlcNAc $\beta$ 6)GalNAc $\alpha$ -Thr (47).**

Compound **47a** (2 mg, 0.62  $\mu$ mol), CMP-Neu5Ac (1.6 mg, 4.0 equiv.), and rST3Gal-III (1 mU) were dissolved in 620  $\mu$ L buffer (50 mM Tris-HCl, pH 7.5, with 100 mU/mL of calf intestine alkaline phosphatase). After incubation overnight at 37  $^{\circ}$ C, the insoluble precipitates were removed by centrifugation and the supernatant was concentrated and purified by Sephadex<sup>TM</sup> G-25 and lyophilized to give the final product as a white powder (2.1 mg, 89 % yield). <sup>1</sup>H NMR (600 MHz, D<sub>2</sub>O):  $\delta$  = 4.89 (d,  $J$  = 3.6 Hz, 1H), 4.71 – 4.65 (m, 6H), 4.60 – 4.51 (m, 4H), 4.48 – 4.37 (m, 7H), 4.23 – 4.05 (m, 12H), 4.02 – 3.47 (m, 105H), 2.74 (dd,  $J$  = 12.4, 4.7 Hz,

2H), 2.07 – 1.94 (m, 33H), 1.79 (t,  $J = 12.3$  Hz, 2H), 1.34 (d,  $J = 6.9$  Hz, 3H); MALDI-TOF MS: permethylated [M-Thr + Na<sup>+</sup>] C205H359N11O102Na, calcd 4628, found 4630.0.

**Neu5Ac $\alpha$ 6Gal $\beta$ 4GlcNAc $\beta$ 3Gal $\beta$ 4GlcNAc $\beta$ 3Gal $\beta$ 4GlcNAc $\beta$ 3Gal $\beta$ 4GlcNAc $\beta$ 3(Neu5Ac $\alpha$ 6Gal $\beta$ 4GlcNAc $\beta$ 3Gal $\beta$ 4GlcNAc $\beta$ 3Gal $\beta$ 4GlcNAc $\beta$ 3Gal $\beta$ 4GlcNAc $\beta$ 6)GalNAc $\alpha$ -Thr (107).**

Compound **47a** (0.5 mg, 0.15  $\mu$ mol), CMP-Neu5Ac (0.4 mg, 4.0 equiv.), and hST6Gal-I (1.5 mU) were dissolved in 103  $\mu$ L buffer (50 mM Tris-HCl, pH 7.5, with 100 mU/mL of calf intestine alkaline phosphatase). After incubation overnight at 37 °C, the insoluble precipitates were removed by centrifugation and the supernatant was concentrated and purified by Sephadex<sup>TM</sup> G-25 and lyophilized to give the final product as a white powder (0.5 mg, 85 % yield). <sup>1</sup>H NMR (600 MHz, D<sub>2</sub>O):  $\delta = 4.89$  (d,  $J = 3.4$  Hz, 1H), 4.73 – 4.65 (m, 6H), 4.60 – 4.53 (m, 2H), 4.49 – 4.38 (m, 9H), 4.23 – 4.06 (m, 10H), 4.03 – 3.47 (m, 107H), 2.66 (dd,  $J = 12.4$ , 4.7 Hz, 2H), 2.09 – 1.95 (m, 33H), 1.71 (t,  $J = 12.3$  Hz, 2H), 1.34 (d,  $J = 6.6$  Hz, 3H); MALDI-TOF MS: permethylated [M-Thr + Na<sup>+</sup>] C205H359N11O102Na, calcd 4628, found 4630.0.

**GlcNAc3Gal $\beta$ 4GlcNAc $\beta$ 3Gal $\beta$ 4GlcNAc $\beta$ 3Gal $\beta$ 4GlcNAc $\beta$ 3Gal $\beta$ 4GlcNAc $\beta$ 3(GlcNAc $\beta$ 3Gal $\beta$ 4GlcNAc $\beta$ 3Gal $\beta$ 4GlcNAc $\beta$ 3Gal $\beta$ 4GlcNAc $\beta$ 3Gal $\beta$ 4GlcNAc $\beta$ 6)GalNAc $\alpha$ -Thr (47b).**

Compound **47a** (9 mg, 2.75  $\mu$ mol) was treated with a mixture of 8 mU of HP  $\beta$ 3GlcNAcT and UDP-GlcNAc (47 mg, 4.0 equiv.) in 0.28 mL buffer (50 mM HEPES-NaOH buffer, pH 7.2, with 25 mM KCl, 1 mM DTT, 2 mM MnCl<sub>2</sub>, 100 mU/mL of calf intestine alkaline phosphatase). The reaction mixture was incubated overnight at 37 °C. The insoluble precipitates were removed by centrifugation and the supernatant was concentrated, purified by Sephadex<sup>TM</sup> G-25 and lyophilized to give the final product as a white powder (9 mg, 90 % yield). <sup>1</sup>H NMR (600 MHz, D<sub>2</sub>O):  $\delta = 4.88$  (d,  $J = 4.1$  Hz, 1H), 4.71 – 4.63 (m, 8H), 4.60 – 4.53 (m, 2H), 4.49 – 4.41 (m, 8H), 4.38 – 4.29 (m, 1H), 4.24 – 4.05 (m, 12H), 4.01 – 3.62 (m, 81H), 3.61 – 3.50 (m, 18H), 3.48 – 3.40 (m, 4H), 2.08 – 1.94 (m, 33H), 1.33 (d,  $J = 6.7$  Hz, 3H); MALDI-TOF MS: C140H232N12O98Na [M+Na<sup>+</sup>], calcd 3671, found 3672.

**Gal $\beta$ 4GlcNAc3Gal $\beta$ 4GlcNAc $\beta$ 3Gal $\beta$ 4GlcNAc $\beta$ 3Gal $\beta$ 4GlcNAc $\beta$ 3Gal $\beta$ 4GlcNAc $\beta$ 3(Gal $\beta$ 4GlcNAc $\beta$ 3Gal $\beta$ 4GlcNAc $\beta$ 3Gal $\beta$ 4GlcNAc $\beta$ 3Gal $\beta$ 4GlcNAc $\beta$ 6)GalNAc $\alpha$ -Thr (48a).**

Compound **47b** (10 mg, 2.72  $\mu$ mol) was treated with a mixture of 15 mU of GalT-1 and UDP-Gal (6.6 mg, 4.0 equiv.) in 0.55 mL buffer (50 mM Tris-HCl buffer, pH 7.5, with 0.1 mg/mL BSA, 20 mM MnCl<sub>2</sub>, 100 mU/mL of calf intestine alkaline phosphatase). The reaction mixture was incubated overnight at 37 °C. The insoluble precipitates were removed by centrifugation and the supernatant was concentrated, purified by Sephadex<sup>TM</sup> G-25 and lyophilized to give the final product as a white powder (10 mg, 92 % yield). <sup>1</sup>H NMR (600 MHz, D<sub>2</sub>O):  $\delta = 4.88$  (d,  $J = 4.0$  Hz, 1H), 4.72 – 4.64 (m, 8H), 4.59 – 4.52 (m, 2H), 4.51 – 4.36 (m, 11H), 4.24 – 4.06 (m, 12H), 4.01 – 3.88 (m, 13H), 3.88 – 3.62 (m, 82H), 3.62 – 3.48 (m, 20H), 2.10 – 1.94 (m, 33H), 1.34 (d,  $J = 6.7$  Hz, 3H); MALDI-TOF MS: [M+Na<sup>+</sup>] C152H252N12O108Na, calcd 3995, found 3998.

**Neu5Ac $\alpha$ 3Gal $\beta$ 4GlcNAc3Gal $\beta$ 4GlcNAc $\beta$ 3Gal $\beta$ 4GlcNAc $\beta$ 3Gal $\beta$ 4GlcNAc $\beta$ 3Gal $\beta$ 4GlcNAc $\beta$ 3(Neu5Ac $\alpha$ 3Gal $\beta$ 4GlcNAc $\beta$ 3Gal $\beta$ 4GlcNAc $\beta$ 3Gal $\beta$ 4GlcNAc $\beta$ 3Gal $\beta$ 4GlcNAc $\beta$ 6)GalNAc $\alpha$ -Thr (48).**

Compound **48a** (2 mg, 0.5  $\mu$ mol), CMP-Neu5Ac (1.3 mg, 4.0 equiv.), and rST3Gal-III (1 mU) were dissolved in 500  $\mu$ L buffer (50 mM Tris-HCl, pH 7.5, with 100 mU/mL of calf intestine alkaline phosphatase). After incubation overnight at 37 °C, the insoluble precipitates were removed by centrifugation and the supernatant was concentrated and purified by Sephadex<sup>TM</sup> G-25 and lyophilized to give the final product as a white powder (2.1 mg, 92 % yield). <sup>1</sup>H NMR (600 MHz, D<sub>2</sub>O):  $\delta = 4.89$  (d,  $J = 2.9$  Hz, 1H), 4.72 – 4.65 (m, 8H), 4.60 – 4.52 (m, 4H), 4.49 – 4.36 (m, 9H), 4.26 – 4.05 (m, 14H), 4.04 – 3.43 (m, 127H), 2.74 (dd,  $J = 12.5$ , 4.6 Hz, 2H), 2.10 – 1.94 (m, 39H), 1.79 (t,  $J = 11.9$  Hz, 2H), 1.34 (d,  $J = 6.8$  Hz, 3H); MALDI-TOF MS: permethylated [M-Thr + Na<sup>+</sup>] C245H429N13O122Na, calcd 5526, found 5527.9.

**Neu5Ac $\alpha$ 6Gal $\beta$ 4GlcNAc3Gal $\beta$ 4GlcNAc $\beta$ 3Gal $\beta$ 4GlcNAc $\beta$ 3Gal $\beta$ 4GlcNAc $\beta$ 3Gal $\beta$ 4GlcNAc $\beta$ 3(Neu5Ac $\alpha$ 6Gal $\beta$ 4GlcNAc $\beta$ 3Gal $\beta$ 4GlcNAc $\beta$ 3Gal $\beta$ 4GlcNAc $\beta$ 3Gal $\beta$ 4GlcNAc $\beta$ 6)GalNAc $\alpha$ -Thr (108).**

Compound **48a** (0.5 mg, 0.125  $\mu$ mol), CMP-Neu5Ac (0.4 mg, 4.0 equiv.), and hST6Gal-I (1.5 mU) were dissolved in 83  $\mu$ L buffer (50 mM Tris-HCl, pH 7.5, with 100 mU/mL of calf intestine alkaline phosphatase). After incubation overnight at 37 °C, the insoluble precipitates were removed by centrifugation and the supernatant was concentrated and purified by Sephadex<sup>TM</sup> G-25 and lyophilized to give the final product as a white powder (0.5 mg, 88 % yield). <sup>1</sup>H NMR (600 MHz, D<sub>2</sub>O):  $\delta = 4.89$  (s, 1H), 4.73 – 4.65 (m, 8H), 4.60 –

4.53 (m, 2H), 4.49 – 4.34 (m, 11H), 4.26 – 4.05 (m, 12H), 4.03 – 3.42 (m, 129H), 2.66 (dd,  $J = 12.6, 4.7$  Hz, 2H), 2.08 – 1.96 (m, 39H), 1.71 (t,  $J = 12.1$  Hz, 2H), 1.34 (d,  $J = 6.5$  Hz, 3H); MALDI-TOF MS: permethylated [M-Thr + Na<sup>+</sup>] C245H429N13O122Na, calcd 5526, found 5527.9.

#### **GlcNAc $\beta$ 3Gal $\beta$ 4GlcNAc $\beta$ 3Gal $\beta$ 4GlcNAc $\beta$ 6GalNAc $\alpha$ -Thr (49d).**

Compound **49c** (7.8 mg, 7.4  $\mu$ mol) was treated with a mixture of 30 mU of HP  $\beta$ 3GlcNAcT and UDP-GlcNAc (9.6 mg, 2.0 equiv.) in 0.74 mL buffer (50 mM HEPES-NaOH buffer, pH 7.2, with 25 mM KCl, 1 mM DTT, 2 mM MnCl<sub>2</sub>, 100 mU/mL of calf intestine alkaline phosphatase). The reaction mixture was incubated overnight at 37 °C. The insoluble precipitates were removed by centrifugation and the supernatant was concentrated, purified by Sephadex<sup>TM</sup> G-25 and lyophilized to give the final product as a white powder (8.5 mg, 91 % yield). <sup>1</sup>H NMR (600 MHz, D<sub>2</sub>O):  $\delta = 4.92$  (d,  $J = 3.8$  Hz, 1H), 4.70 – 4.65 (m, 2H), 4.56 (d,  $J = 8.4$  Hz, 1H), 4.48 – 4.41 (m, 2H), 4.35 (qd,  $J = 6.7, 2.2$  Hz, 1H), 4.18 – 4.04 (m, 5H), 4.03 – 3.91 (m, 3H), 3.91 – 3.63 (m, 22H), 3.62 – 3.52 (m, 5H), 3.48 – 3.39 (m, 2H), 2.08 – 1.98 (m, 12H), 1.34 (d,  $J = 6.7$  Hz, 3H); MALDI-TOF MS: [M+Na<sup>+</sup>] C48H81N5O33Na, calcd 1278, found 1279.

#### **Gal $\beta$ 4GlcNAc $\beta$ 3Gal $\beta$ 4GlcNAc $\beta$ 3Gal $\beta$ 4GlcNAc $\beta$ 6GalNAc $\alpha$ -Thr (49e).**

Compound **49d** (6 mg, 4.77  $\mu$ mol) was treated with a mixture of 15 mU of GalT-1 and UDP-Gal (5.8 mg, 2.0 equiv.) in 0.48 mL buffer (50 mM Tris-HCl buffer, pH 7.5, with 0.1 mg/mL BSA, 20 mM MnCl<sub>2</sub>, 100 mU/mL of calf intestine alkaline phosphatase). The reaction mixture was incubated overnight at 37 °C. The insoluble precipitates were removed by centrifugation and the supernatant was concentrated, purified by Sephadex<sup>TM</sup> G-25 and lyophilized to give the final product as a white powder (6 mg, 89 % yield). <sup>1</sup>H NMR (600 MHz, D<sub>2</sub>O):  $\delta = 4.92$  (d,  $J = 3.9$  Hz, 1H), 4.71 – 4.66 (m, 2H), 4.58 (d,  $J = 8.3$  Hz, 1H), 4.49 – 4.41 (m, 3H), 4.37 (qd,  $J = 6.6, 2.0$  Hz, 1H), 4.19 – 4.05 (m, 5H), 4.03 – 3.88 (m, 5H), 3.89 – 3.62 (m, 27H), 3.62 – 3.50 (m, 6H), 2.07 – 1.99 (m, 12H), 1.35 (d,  $J = 6.8$  Hz, 3H); MALDI-TOF MS: [M+Na<sup>+</sup>] C54H91N5O38Na, calcd 1440, found 1441.

#### **GlcNAc $\beta$ 3Gal $\beta$ 4GlcNAc $\beta$ 3Gal $\beta$ 4GlcNAc $\beta$ 3Gal $\beta$ 4GlcNAc $\beta$ 6GalNAc $\alpha$ -Thr (49f).**

Compound **49e** (4.1 mg, 2.89  $\mu$ mol) was treated with a mixture of 8.5 mU of HP  $\beta$ 3GlcNAcT and UDP-GlcNAc (3.8 mg, 2.0 equiv.) in 0.29 mL buffer (50 mM HEPES-NaOH buffer, pH 7.2, with 25 mM KCl, 1 mM DTT, 2 mM MnCl<sub>2</sub>, 100 mU/mL of calf intestine alkaline phosphatase). The reaction mixture was incubated overnight at 37 °C. The insoluble precipitates were removed by centrifugation and the supernatant was concentrated, purified by Sephadex<sup>TM</sup> G-25 and lyophilized to give the final product as a white powder (4.1 mg, 87 % yield). <sup>1</sup>H NMR (600 MHz, D<sub>2</sub>O):  $\delta = 4.92$  (d,  $J = 3.8$  Hz, 1H), 4.71 – 4.64 (m, 3H), 4.56 (d,  $J = 8.3$  Hz, 1H), 4.48 – 4.42 (m, 3H), 4.38 (qd,  $J = 6.6, 2.2$  Hz, 1H), 4.18 – 4.04 (m, 6H), 4.02 – 3.64 (m, 34H), 3.62 – 3.51 (m, 7H), 3.50 – 3.38 (m, 2H), 2.08 – 1.97 (m, 15H), 1.35 (d,  $J = 6.8$  Hz, 3H); MALDI-TOF MS: [M+Na<sup>+</sup>] C62H104N6O43Na, calcd 1643, found 1644.

#### **Gal $\beta$ 4GlcNAc $\beta$ 3Gal $\beta$ 4GlcNAc $\beta$ 3Gal $\beta$ 4GlcNAc $\beta$ 3Gal $\beta$ 4GlcNAc $\beta$ 6GalNAc $\alpha$ -Thr (49a).**

Compound **49f** (3.4 mg, 2.1  $\mu$ mol) was treated with a mixture of 9 mU of GalT-1 and UDP-Gal (2.6 mg, 2.0 equiv.) in 0.42 mL buffer (50 mM Tris-HCl buffer, pH 7.5, with 0.1 mg/mL BSA, 20 mM MnCl<sub>2</sub>, 100 mU/mL of calf intestine alkaline phosphatase). The reaction mixture was incubated overnight at 37 °C. The insoluble precipitates were removed by centrifugation and the supernatant was concentrated, purified by Sephadex<sup>TM</sup> G-25 and lyophilized to give the final product as a white powder (3.3 mg, 89 % yield). <sup>1</sup>H NMR (600 MHz, D<sub>2</sub>O):  $\delta = 4.92$  (d,  $J = 3.9$  Hz, 1H), 4.71 – 4.64 (m, 3H), 4.56 (d,  $J = 8.3$  Hz, 1H), 4.50 – 4.41 (m, 4H), 4.36 (dd,  $J = 6.7, 2.6$  Hz, 1H), 4.18 – 4.05 (m, 6H), 4.02 – 3.89 (m, 6H), 3.89 – 3.62 (m, 35H), 3.62 – 3.48 (m, 8H), 2.07 – 1.99 (m, 15H), 1.35 (d,  $J = 6.8$  Hz, 3H); MALDI-TOF MS: [M+Na<sup>+</sup>] C68H114N6O48Na, calcd 1805, found 1806.

#### **Neu5Ac $\alpha$ 3Gal $\beta$ 4GlcNAc $\beta$ 3Gal $\beta$ 4GlcNAc $\beta$ 3Gal $\beta$ 4GlcNAc $\beta$ 3Gal $\beta$ 4GlcNAc $\beta$ 6GalNAc $\alpha$ -Thr (49).**

Compound **49a** (0.5 mg, 0.28  $\mu$ mol), CMP-Neu5Ac (0.4 mg, 2.0 equiv.), and rST3Gal-III (2 mU) were dissolved in 93  $\mu$ L buffer (50 mM Tris-HCl, pH 7.5, with 100 mU/mL of calf intestine alkaline phosphatase). After incubation overnight at 37 °C, the insoluble precipitates were removed by centrifugation and the supernatant was concentrated and purified by Sephadex<sup>TM</sup> G-25 and lyophilized to give the final product as a white powder (0.5 mg, 86 % yield).

<sup>1</sup>H NMR (600 MHz, D<sub>2</sub>O):  $\delta = 4.93$  (d,  $J = 3.7$  Hz, 1H), 4.71 – 4.65 (m, 3H), 4.58 – 4.52 (m, 2H), 4.48 – 4.42 (m, 3H), 4.41 – 4.37 (m, 1H), 4.19 – 4.05 (m, 7H), 4.03 – 3.48 (m, 55H), 2.75 (dd,  $J = 12.1, 4.8$  Hz, 1H), 2.10



– 1.96 (m, 18H), 1.79 (t,  $J = 12.3$  Hz, 1H), 1.35 (d,  $J = 6.7$  Hz, 3H); MALDI-TOF MS: permethylated  $[M + Na^+]$  C115H203N7O56Na, calcd 2600, found 2601.1.

#### **Neu5Ac $\alpha$ 6Gal $\beta$ 4GlcNAc $\beta$ 3Gal $\beta$ 4GlcNAc $\beta$ 3Gal $\beta$ 4GlcNAc $\beta$ 3Gal $\beta$ 4GlcNAc $\beta$ 6GalNAc $\alpha$ -Thr (109).**

Compound **49a** (0.5 mg, 0.28  $\mu$ mol), CMP-Neu5Ac (0.4 mg, 2.0 equiv.), and hST6Gal-I (0.8 mU) were dissolved in 93  $\mu$ L buffer (50 mM Tris-HCl, pH 7.5, with 100 mU/mL of calf intestine alkaline phosphatase). After incubation overnight at 37 °C, the insoluble precipitates were removed by centrifugation and the supernatant was concentrated and purified by Sephadex<sup>TM</sup> G-25 and lyophilized to give the final product as a white powder (0.5 mg, 86 % yield). MALDI-TOF MS: permethylated  $[M + Na^+]$  C115H203N7O56Na, calcd 2600, found 2601.1.

#### **GlcNAc $\beta$ 3Gal $\beta$ 4GlcNAc $\beta$ 3Gal $\beta$ 4GlcNAc $\beta$ 3Gal $\beta$ 4GlcNAc $\beta$ 3Gal $\beta$ 4GlcNAc $\beta$ 6GalNAc $\alpha$ -Thr (49b).**

Compound **49a** (2 mg, 1.12  $\mu$ mol) was treated with a mixture of 5 mU of HP  $\beta$ 3GlcNAcT and UDP-GlcNAc (1.5 mg, 2.0 equiv.) in 112  $\mu$ L buffer (50 mM HEPES-NaOH buffer, pH 7.2, with 25 mM KCl, 1 mM DTT, 2 mM MnCl<sub>2</sub>, 100 mU/mL of calf intestine alkaline phosphatase). The reaction mixture was incubated overnight at 37 °C. The insoluble precipitates were removed by centrifugation and the supernatant was concentrated, purified by Sephadex<sup>TM</sup> G-25 and lyophilized to give the final product as a white powder (2.0 mg, 89 % yield). <sup>1</sup>H NMR (600 MHz, D<sub>2</sub>O):  $\delta = 4.93$  (d,  $J = 3.8$  Hz, 1H), 4.71 – 4.65 (m, 4H), 4.56 (d,  $J = 8.3$  Hz, 1H), 4.47 – 4.42 (m, 4H), 4.37 (dd,  $J = 6.7, 2.3$  Hz, 1H), 4.18 – 4.07 (m, 7H), 4.02 – 3.65 (m, 42H), 3.3 – 3.52 (m, 10H), 3.49 – 3.39 (m, 2H), 2.10 – 1.97 (m, 18H), 1.35 (dd,  $J = 6.8, 2.3$  Hz, 3H); MALDI-TOF MS:  $[M+Na^+]$  C76H127N7O53Na, calcd 2008, found 2008.

#### **Gal $\beta$ 4GlcNAc $\beta$ 3Gal $\beta$ 4GlcNAc $\beta$ 3Gal $\beta$ 4GlcNAc $\beta$ 3Gal $\beta$ 4GlcNAc $\beta$ 3Gal $\beta$ 4GlcNAc $\beta$ 6GalNAc $\alpha$ -Thr (50a).**

Compound **49b** (1.5 mg, 0.75  $\mu$ mol) was treated with a mixture of 3 mU of GalT-1 and UDP-Gal (1 mg, 2.0 equiv.) in 0.15 mL buffer (50 mM Tris-HCl buffer, pH 7.5, with 0.1 mg/mL BSA, 20 mM MnCl<sub>2</sub>, 100 mU/mL of calf intestine alkaline phosphatase). The reaction mixture was incubated overnight at 37 °C. The insoluble precipitates were removed by centrifugation and the supernatant was concentrated, purified by Sephadex<sup>TM</sup> G-25 and lyophilized to give the final product as a white powder (1.5 mg, 93 % yield). <sup>1</sup>H NMR (600 MHz, D<sub>2</sub>O):  $\delta = 4.93$  (d,  $J = 3.8$  Hz, 1H), 4.68 (d,  $J = 8.7$  Hz, 4H), 4.56 (d,  $J = 8.4$  Hz, 1H), 4.47 – 4.42 (m, 5H), 4.38 (dd,  $J = 6.6, 2.2$  Hz, 1H), 4.19 – 4.05 (m, 7H), 4.01 – 3.89 (m, 7H), 3.88 – 3.63 (m, 43H), 3.62 – 3.50 (m, 10H), 2.07 – 1.97 (m, 18H), 1.35 (d,  $J = 6.7$  Hz, 3H); MALDI-TOF MS:  $[M+Na^+]$  C82H137N7O58Na, calcd 2170, found 2171.

#### **Neu5Ac $\alpha$ 3Gal $\beta$ 4GlcNAc $\beta$ 6GalNAc $\alpha$ -Thr (50).**

Compound **50a** (0.5 mg, 0.23  $\mu$ mol), CMP-Neu5Ac (0.4 mg, 2.0 equiv.), and rST3Gal-III (2 mU) were dissolved in 46  $\mu$ L buffer (50 mM Tris-HCl, pH 7.5, with 100 mU/mL of calf intestine alkaline phosphatase). After incubation overnight at 37 °C, the insoluble precipitates were removed by centrifugation and the supernatant was concentrated and purified by Sephadex<sup>TM</sup> G-25 and lyophilized to give the final product as a white powder (0.5 mg, 88 % yield). <sup>1</sup>H NMR (600 MHz, D<sub>2</sub>O):  $\delta = 4.93$  (d,  $J = 3.8$  Hz, 1H), 4.71 – 4.65 (m, 4H), 4.58 – 4.52 (m, 2H), 4.47 – 4.42 (m, 5H), 4.40 – 4.35 (m, 1H), 4.19 – 4.05 (m, 8H), 4.03 – 3.51 (m, 65H), 2.74 (dd,  $J = 12.1, 4.3$  Hz, 1H), 2.07 – 1.97 (m, 21H), 1.79 (t,  $J = 12.2$  Hz, 1H), 1.39 – 1.31 (m, 3H); MALDI-TOF MS: permethylated  $[M\text{-Thr} + Na^+]$  C129H227N7O64Na, calcd 2920, found 2921.1.

#### **Neu5Ac $\alpha$ 6Gal $\beta$ 4GlcNAc $\beta$ 3Gal $\beta$ 4GlcNAc $\beta$ 3Gal $\beta$ 4GlcNAc $\beta$ 3Gal $\beta$ 4GlcNAc $\beta$ 3Gal $\beta$ 4GlcNAc $\beta$ 6GalNAc $\alpha$ -Thr (110).**

Compound **50a** (0.5 mg, 0.23  $\mu$ mol), CMP-Neu5Ac (0.4 mg, 2.0 equiv.), and hST6Gal-I (1 mU) were dissolved in 46  $\mu$ L buffer (50 mM Tris-HCl, pH 7.5, with 100 mU/mL of calf intestine alkaline phosphatase). After incubation overnight at 37 °C, the insoluble precipitates were removed by centrifugation and the supernatant was concentrated and purified by Sephadex<sup>TM</sup> G-25 and lyophilized to give the final product as a white powder (0.5 mg, 88 % yield). <sup>1</sup>H NMR (600 MHz, D<sub>2</sub>O):  $\delta = 4.93$  (d,  $J = 3.4$  Hz, 1H), 4.74 – 4.66 (m, 4H), 4.56 (d,  $J = 8.4$  Hz, 1H), 4.48 – 4.41 (m, 5H), 4.40 – 4.35 (m, 1H), 4.18 – 4.04 (m, 6H), 4.03 – 3.45 (m, 68H), 2.66 (dd,  $J = 12.3, 4.4$  Hz, 1H), 2.03 (d,  $J = 14.1$  Hz, 21H), 1.71 (t,  $J = 12.1$  Hz, 1H), 1.35 (d,  $J = 6.7$  Hz, 3H); MALDI-TOF MS: permethylated  $[M + Na^+]$  C129H227N7O64Na, calcd 2920, found 2921.2.

#### **Neu5Ac $\alpha$ 3Gal $\beta$ 3GlcNAc $\beta$ 3Gal $\beta$ 4GlcNAc $\beta$ 6(Neu5Ac $\alpha$ 3Gal $\beta$ 3GlcNAc $\beta$ 3)Gal $\beta$ 4GlcNAc $\beta$ CH<sub>2</sub>CH<sub>2</sub>NH<sub>2</sub> (51)**

Compound **51a** (0.6 mg, 0.39  $\mu\text{mol}$ ), CMP-Neu5Ac (1 mg, 4.0 equiv.), and rST3Gal-III (2 mU) were dissolved in 197  $\mu\text{L}$  buffer (50 mM Tris-HCl, pH 7.5, with 100 mU/mL of calf intestine alkaline phosphatase). After incubation overnight at 37 °C, the insoluble precipitates were removed by centrifugation and the supernatant was concentrated and purified by Sephadex<sup>TM</sup> G-25 and lyophilized to give the final product as a white powder (0.7 mg, 84 % yield).

**Neu5Ac $\alpha$ 3Gal $\beta$ 6GlcNAc $\beta$ 3Gal $\beta$ 6GlcNAc $\beta$ 3Gal $\beta$ 4GlcNAc $\beta$ 6(Neu5Ac $\alpha$ 3Gal $\beta$ 6GlcNAc $\beta$ 3Gal $\beta$ 6GlcNAc $\beta$ 3)Gal $\beta$ 4GlcNAc $\beta$ CH<sub>2</sub>CH<sub>2</sub>NH<sub>2</sub> (52)**

Compound **52a** (0.5 mg, 0.22  $\mu\text{mol}$ ), CMP-Neu5Ac (0.6 mg, 4.0 equiv.), and rST3Gal-III (2 mU) were dissolved in 110  $\mu\text{L}$  buffer (50 mM Tris-HCl, pH 7.5, with 100 mU/mL of calf intestine alkaline phosphatase). After incubation overnight at 37 °C, the insoluble precipitates were removed by centrifugation and the supernatant was concentrated and purified by Sephadex<sup>TM</sup> G-25 and lyophilized to give the final product as a white powder (0.55 mg, 87 % yield). MALDI-TOF MS, [M+H<sup>+</sup>] C108H180N9O77Na, calcd 2834, found 2836.

**Neu5Ac $\alpha$ 6Gal $\beta$ 6GlcNAc $\beta$ 3Gal $\beta$ 6GlcNAc $\beta$ 3Gal $\beta$ 4GlcNAc $\beta$ 6(Neu5Ac $\alpha$ 6Gal $\beta$ 6GlcNAc $\beta$ 3Gal $\beta$ 6GlcNAc $\beta$ 3)Gal $\beta$ 4GlcNAc $\beta$ CH<sub>2</sub>CH<sub>2</sub>NH<sub>2</sub> (111)**

Compound **52a** (0.5 mg, 0.22  $\mu\text{mol}$ ), CMP-Neu5Ac (0.6 mg, 4.0 equiv.), and hST6Gal-I (1 mU) were dissolved in 110  $\mu\text{L}$  buffer (50 mM Tris-HCl, pH 7.5, with 100 mU/mL of calf intestine alkaline phosphatase). After incubation overnight at 37 °C, the insoluble precipitates were removed by centrifugation and the supernatant was concentrated and purified by Sephadex<sup>TM</sup> G-25 and lyophilized to give the final product as a white powder (0.55 mg, 87 % yield). MALDI-TOF MS: [M+H<sup>+</sup>] C108H180N9O77Na, calcd 2834, found 2836.

**Neu5Ac $\alpha$ 6Gal $\beta$ 6GlcNAc $\beta$ 3Gal $\beta$ 4GlcNAc $\beta$ 6(Neu5Ac $\alpha$ 6Gal $\beta$ 6GlcNAc $\beta$ 3)Gal $\beta$ 4GlcNAc $\beta$ CH<sub>2</sub>CH<sub>2</sub>NH<sub>2</sub> (112)**

Compound **112a** (0.4 mg, 0.263  $\mu\text{mol}$ ), CMP-Neu5Ac (0.7 mg, 4.0 equiv.), and hST6Gal-I (1 mU) were dissolved in 132  $\mu\text{L}$  buffer (50 mM Tris-HCl, pH 7.5, with 100 mU/mL of calf intestine alkaline phosphatase). After incubation overnight at 37 °C, the insoluble precipitates were removed by centrifugation and the supernatant was concentrated and purified by Sephadex<sup>TM</sup> G-25 and lyophilized to give the final product as a white powder (0.5 mg, 91 % yield).

**Gal $\beta$ 4GlcNAc $\beta$ 2Man $\alpha$ 3(Gal $\beta$ 4GlcNAc $\beta$ 2Man $\alpha$ 6)Man $\beta$ 4GlcNAc $\beta$ 4GlcNAc $\beta$ -(KVA)NKT (53a)**

Egg yolk extraction **SGP (116)**, 25 mg, 8.7  $\mu\text{mol}$ ) was incubated with 0.044 mU neuraminidase (from *Arthrobacter ureafaciens*) in a sodium acetate buffer (220  $\mu\text{L}$ , 50 mM, pH 6.0) at 37 °C overnight. The product was purified by Sephadex<sup>TM</sup> G-25 and lyophilized to give the final product as a white powder (20.0 mg, 100 % yield); MALDI-TOF MS *m/z* calcd for C90H156N13O54 [M+H<sup>+</sup>] 2283, found 2283.

**GlcNAc $\beta$ 2Man $\alpha$ 3(GlcNAc $\beta$ 2Man $\alpha$ 6)Man $\beta$ 4GlcNAc $\beta$ 4GlcNAc $\beta$ -(KVA)NKT (53c)**

**53a** (12.0 mg, 5.26  $\mu\text{mol}$ ) was incubated with pre-dialyzed (to removal of dextrin)  $\beta$ -galactosidase (0.04 U) from *Aspergillus oryzae* and general protease inhibitor cocktail (188  $\mu\text{L}$ ) in a total volume of 262  $\mu\text{L}$  of 50 mM GlcNAc, 30 mM NaOAc, pH 5.0 at 37 °C for 4 h. The reaction was monitored by TLC analysis until complete removal of terminal galactose. Longer incubation time may result in the subsequent loss of the six amino acids. The insoluble precipitates were removed by centrifugation and the supernatant was concentrated and purified by Sephadex<sup>TM</sup> G-25 and lyophilized to give the final product as a white powder (10.3 mg, 100 % yield). <sup>1</sup>H NMR (600 MHz, D<sub>2</sub>O):  $\delta$  = 5.09 (s, 1H, H-1<sub>Man</sub>), 5.02 (d, *J* = 9.6 Hz, 1H, H-1<sub>Gn</sub>), 4.90 (s, 1H, H-1<sub>Man</sub>), 4.75 (s, 1H, H-1<sub>Man</sub>), 4.66 (m, 1H, H-1<sub>Asn</sub>), 4.59 (d, *J* = 7.7 Hz, 1H, H-1<sub>Gn</sub>), 4.53 (d, *J* = 8.4 Hz, 2H, 2 H-1<sub>Gn</sub>), 4.38 (m, 1H, H-1<sub>Lys</sub>), 4.28 (q, *J* = 7.4 Hz, 1H, H-1<sub>Ala</sub>), 4.23 (s, 1H, H-2<sub>Man</sub>), 4.20 (m, 1H, H-2<sub>Thr</sub>), 4.17 (d, *J* = 1.9 Hz, 1H, H-2<sub>Man</sub>), 4.12 (m, 1H, H-1<sub>Thr</sub>), 4.08 (m, 2H, H-2<sub>Man</sub>, H-1<sub>Val</sub>), 4.00 – 3.35 (m, 40H), 3.04 – 2.91 (m, 4H, H-5<sub>Lys</sub>), 2.84 (dd, *J* = 16.2, 5.4 Hz, 1H, H-2<sub>Asn</sub>), 2.72 (dd, *J* = 16.1, 7.6 Hz, 1H, H-2<sub>Asn</sub>), 2.05 (s, 3H), 2.04 (m, 1H, H-2<sub>Val</sub>), 2.03 (s, 3H), 2.02(9) (s, 3H), 1.98 (s, 3H), 1.88 (m, 1H), 1.75 (m, 1H), 1.71 – 1.52 (m, 6H), 1.50 – 1.33 (m, 4H), 1.35 (d, *J* = 7.1 Hz, 3H<sub>Ala</sub>), 1.15 (d, *J* = 6.4 Hz, 3H<sub>Thr</sub>), 0.94 (d, *J* = 6.8 Hz, 6H<sub>Val</sub>); <sup>13</sup>C NMR (150 MHz, D<sub>2</sub>O):  $\delta$  = 178.4, 177.2, 176.7, 175.6, 175.5, 175.4, 175.2, 174.1, 173.8, 173.1, 172.7, 102.1, 101.2, 100.4, 97.8, 81.2, 80.3, 79.4, 79.0, 77.2, 77.1, 77.0, 76.6, 76.5(7), 75.2, 75.1, 74.3, 74.2, 74.0, 73.6, 72.8, 71.0, 70.7, 70.2, 70.1(7), 68.7, 68.1, 68.0(7), 66.7, 66.5, 62.5, 62.4, 61.4, 60.7, 60.6, 60.0, 56.1, 55.7, 54.9, 54.4, 54.3, 50.8, 50.3, 40.0, 39.9(8), 37.2, 34.5, 31.3, 30.9, 27.5, 27.1, 23.1, 23.0, 22.9, 22.8, 22.7, 22.6(6), 20.1, 19.3, 18.9, 17.5; MALDI-TOF MS *m/z* calcd for C78H136N13O44 [M+H<sup>+</sup>] 1958, found 1959.

**GlcNAc $\beta$ 2Man $\alpha$ 3(GlcNAc $\beta$ 2Man $\alpha$ 6)Man $\beta$ 4GlcNAc $\beta$ 4(Fuc $\alpha$ 6)GlcNAc $\beta$ -(KVA)NKT (60c)**

**53c** (7.0 mg, 3.58  $\mu\text{mol}$ ), FUT8 (0.02 mU), GDP-Fuc (40% purity, 11.3 mg, 2.0 equiv.) and CIAP (0.04 mU) were dissolved in 358  $\mu\text{L}$  Tris-HCl buffer (50 mM, pH 7.5). The pH was carefully monitored and adjusted (to pH 7.5) as needed. After incubation overnight at 37°C, the insoluble precipitates were removed by centrifugation and the supernatant was concentrated and purified by Sephadex<sup>TM</sup> G-25 and lyophilized to give the final product as a white powder (7.1 mg, 94 % yield). <sup>1</sup>H NMR (600 MHz, D<sub>2</sub>O):  $\delta$  = 5.10 (s, 1H, H-1<sub>Man</sub>), 5.04 (d,  $J$  = 9.7 Hz, 1H, H-1<sub>Gn</sub>), 4.90 (s, 1H, H-1<sub>Man</sub>), 4.86 (d,  $J$  = 3.7 Hz, 1H, H-1<sub>Fuc</sub>), 4.76 (s, 1H, H-1<sub>Man</sub>), 4.67 (m, 2H, H-1<sub>Asn</sub>, H-1<sub>Gn</sub>), 4.54 (d,  $J$  = 8.4 Hz, 1H, 2 H-1<sub>Gn</sub>), 4.39 (t,  $J$  = 6.9 Hz, 1H, H-1<sub>Lys</sub>), 4.28 (q,  $J$  = 7.4 Hz, 1H, H-1<sub>Ala</sub>), 4.24 (s, 1H, H-2<sub>Man</sub>), 4.21 (m, 1H, H-2<sub>Thr</sub>), 4.18 (s, 1H, H-2<sub>Man</sub>), 4.14-4.08 (m, 4H), 4.02 – 3.34 (m, 42H), 2.98 (m, 4H, H-5<sub>Lys</sub>), 2.84 (dd,  $J$  = 4.5, 16.4 Hz, 1H, H-2<sub>Asn</sub>), 2.74 (dd,  $J$  = 8.2, 16.4 Hz, 1H, H-2<sub>Asn</sub>), 2.08 (s, 3H), 2.06 (m, 1H, H-2<sub>Val</sub>), 2.04 (s, 6H), 1.99 (s, 3H), 1.88 (m, 1H), 1.76 (m, 1H), 1.71 – 1.56 (m, 6H), 1.48-1.32 (m, 3H), 1.36 (d,  $J$  = 7.1 Hz, 3H<sub>Ala</sub>), 1.25 (m, 1 H), 1.19 (d,  $J$  = 6.6 Hz, 3H<sub>Fuc</sub>), 1.15 (d,  $J$  = 6.4 Hz, 3H<sub>Thr</sub>), 0.95 (d,  $J$  = 6.8 Hz, 6H<sub>Val</sub>); <sup>13</sup>C NMR (150 MHz, D<sub>2</sub>O):  $\delta$  = 178.3, 177.2, 175.6, 175.55, 175.5, 175.2, 174.1, 173.8, 173.1, 172.8, 101.8, 101.3, 100.4, 100.1, 97.8, 81.2, 80.5, 79.0, 78.9, 77.2, 77.1, 76.6, 76.0, 75.2, 75.1, 74.3, 74.2, 74.1, 73.6, 72.8, 72.6, 71.0, 70.7, 70.3, 70.2, 70.2, 69.0, 68.7, 68.1, 68.1, 67.6, 67.3, 66.5, 62.5, 62.4, 61.4, 60.7, 60.0, 56.1, 55.7, 54.9, 54.4, 50.8, 50.3, 40.0, 39.9(7), 34.5, 31.4, 30.9, 27.5, 27.1, 23.1, 23.0, 22.7, 22.6, 20.1, 19.3, 18.6, 17.5, 16.2; MALDI-TOF MS  $m/z$  calcd for C<sub>84</sub>H<sub>146</sub>N<sub>13</sub>O<sub>48</sub> [M+H<sup>+</sup>] 2104, found 2105.

### **GlcNAc $\beta$ 2(GlcNAc $\beta$ 6)Man $\alpha$ 6(GlcNAc $\beta$ 2Man $\alpha$ 3)Man $\beta$ 4GlcNAc $\beta$ 4GlcNAc $\beta$ -(KVA)NKT (62c)**

**53c** (4.3 mg, 2.2  $\mu\text{mol}$ ), UDP-GlcNAc (7.1 mg, 5.0 equiv.), GnT V (0.015 mU) were dissolved in a total volume of 220  $\mu\text{L}$  of 0.1 mg/mL BSA, 100 mU/mL of calf intestine alkaline phosphatase, HEPES-NaOH buffer (50 mM, pH 7.5). The pH was carefully monitored and adjusted (to pH 7.5) as needed. After incubation overnight at 37°C, the insoluble precipitates were removed by centrifugation and the supernatant was concentrated and purified by Sephadex<sup>TM</sup> G-25 and lyophilized to give the final product as a white powder (4.1 mg, 86 % yield). <sup>1</sup>H NMR (600 MHz, D<sub>2</sub>O):  $\delta$  = 5.11 (s, 1H, H-1<sub>Man</sub>), 5.03 (d,  $J$  = 9.6 Hz, 1H, H-1<sub>Gn</sub>), 4.85 (s, 1H, H-1<sub>Man</sub>), 4.75 (s, 1H, H-1<sub>Man</sub>), 4.69 – 4.64 (m, 1H), 4.59 (d,  $J$  = 7.8 Hz, 1H, H-1<sub>Gn</sub>), 4.55 (d,  $J$  = 8.3 Hz, 1H, H-1<sub>Gn</sub>), 4.54 (d,  $J$  = 8.4 Hz, 1H, H-1<sub>Gn</sub>), 4.51 (d,  $J$  = 8.4 Hz, 1H, H-1<sub>Gn</sub>), 4.43 – 4.37 (m, 1H, H-1<sub>Lys</sub>), 4.29 (d,  $J$  = 7.2 Hz, 1H, H-1<sub>Ala</sub>), 4.23 (d,  $J$  = 2.6 Hz, 1H, H-2<sub>Man</sub>), 4.22 – 4.16 (m, 2H), 4.13 (m, 1H), 4.09 (d,  $J$  = 7.8 Hz, 1H, H-1<sub>Val</sub>), 4.07 (d,  $J$  = 2.4 Hz, 1H, H-2<sub>Man</sub>), 4.01 – 3.22 (m, 46H), 3.04-2.92 (m, 4H), 2.85 (dd,  $J$  = 5.5, 16.3Hz, 1H, H-2<sub>Asn</sub>), 2.73 (dd,  $J$  = 7.6, 16.2Hz, 1H, H-2<sub>Asn</sub>), 2.06 (s, 3H), 2.05 (m, 1H), 2.04 (s, 3H), 2.03 (s, 3H), 2.02 (s, 3H), 1.99 (s, 3H), 1.88 (m, 1H), 1.77 (m, 1H), 1.72 – 1.55 (m, 6H), 1.51-1.35 (m, 4H), 1.36 (d,  $J$  = 7.1 Hz, 3H<sub>Ala</sub>), 1.15 (d,  $J$  = 6.4 Hz, 3H<sub>Thr</sub>), 0.94 (d,  $J$  = 6.7 Hz, 6H<sub>Val</sub>); <sup>13</sup>C NMR (150 MHz, D<sub>2</sub>O):  $\delta$  = 178.4, 177.3, 175.6, 175.5, 175.4, 175.4, 175.3, 175.0, 173.9, 173.8, 173.1, 172.7, 102.5, 102.1, 101.2, 100.5, 100.5, 100.4, 98.0, 81.2, 80.2, 79.4, 79.0, 77.3, 77.3, 77.0, 76.6, 75.3, 75.2, 74.5, 74.4, 74.1, 73.7, 72.7, 72.4, 71.0, 70.7, 70.7, 70.2, 70.2, 68.7, 68.3, 68.1, 66.4, 62.5, 61.6, 61.4, 60.7, 60.0, 56.4, 56.2, 56.1, 55.7, 54.8, 54.4, 54.4, 54.3, 50.8, 50.3, 40.0, 39.9(8), 34.5, 31.3, 30.9, 27.5, 27.1, 23.3, 23.1, 23.0, 22.9, 22.8, 22.7, 22.6, 20.1, 19.3, 18.6, 17.5. MALDI-TOF MS  $m/z$  calcd for C<sub>86</sub>H<sub>149</sub>N<sub>14</sub>O<sub>49</sub> [M+H<sup>+</sup>] 2161, found 2162.

### **GlcNAc $\beta$ 2(GlcNAc $\beta$ 6)Man $\alpha$ 6(GlcNAc $\beta$ 2Man $\alpha$ 3)Man $\beta$ 4GlcNAc $\beta$ 4(Fuc $\alpha$ 6)GlcNAc $\beta$ -(KVA)NKT (65c)**

**62c** (1.0 mg, 0.46  $\mu\text{mol}$ ), 40% GDP-Fuc (1.5 mg, 2.0 equiv.), CIAP (0.008 mU) and FUT8 (0.004 mU) were dissolved in 46  $\mu\text{L}$  Tris-HCl buffer (50 mM, pH 7.5). The pH was carefully monitored and adjusted (to pH 7.5) as needed. After incubation overnight at 37 °C, the insoluble precipitates were removed by centrifugation and the supernatant was concentrated and purified by Sephadex<sup>TM</sup> G-25 and lyophilized to give the final product as a white powder (1.0 mg, 94 % yield). <sup>1</sup>H NMR (600 MHz, D<sub>2</sub>O):  $\delta$  = 5.10 (s, 1H, H-1<sub>Man</sub>), 5.03 (d,  $J$  = 9.7 Hz, 1H, H-1<sub>Gn</sub>), 4.85 (d,  $J$  = 3.6 Hz, 1H, H-1<sub>Fuc</sub>), 4.84 (s, 1H, H-1<sub>Man</sub>), 4.75 (s, 1H, H-1<sub>Man</sub>), 4.70-4.63 (m, 2H, H-1<sub>Asn</sub>, H-1<sub>Gn</sub>), 4.54 (d,  $J$  = 8.4 Hz, 1H, H-1<sub>Gn</sub>), 4.53 (d,  $J$  = 8.4 Hz, 1H, H-1<sub>Gn</sub>), 4.51(d,  $J$  = 8.4 Hz, 1H, H-1<sub>Gn</sub>), 4.38 (m, 1H, H-1<sub>Lys</sub>), 4.28 (m, 1H, H-1<sub>Ala</sub>), 4.23 (s, 1H, H-2<sub>Man</sub>), 4.22-4.16 (m, 2H), 4.17 (s, 1H, H-2<sub>Man</sub>), 4.15 – 4.09 (m, 2H), 4.07 (s, 1H, H-2<sub>Man</sub>), 4.00 – 3.30 (m, 58H), 3.03 – 2.91 (m, 4H, H-5<sub>Lys</sub>), 2.83 (dd,  $J$  = 4.7, 16.4 Hz, 1H, H-2<sub>Asn</sub>), 2.73 (dd,  $J$  = 8.1, 16.1 Hz, 1H, H-2<sub>Asn</sub>), 2.11 (m, 1H, H-2<sub>Val</sub>), 2.07 (s, 3H), 2.04 (s, 3H), 2.03 (s, 3H), 2.02 (s, 3H), 1.99 (s, 3H), 1.93 – 1.82 (m, 1H), 1.75 (m, 1H), 1.71-1.52 (m, 6H), 1.50-1.35 (m, 4H), 1.35 (d,  $J$  = 7.1 Hz, 3H<sub>Ala</sub>), 1.18 (d,  $J$  = 6.5 Hz, 3H<sub>Fuc</sub>), 1.15 (d,  $J$  = 6.4 Hz, 3H<sub>Thr</sub>), 0.94 (d,  $J$  = 6.8 Hz, 6H<sub>Val</sub>); <sup>13</sup>C NMR (150 MHz, D<sub>2</sub>O):  $\delta$  = 178.4, 177.3, 177.2, 175.6, 175.4, 175.4, 175.2, 175.0, 173.8, 173.1, 172.8, 102.5, 101.8, 101.2, 100.5, 100.4, 100.4, 100.1, 98.0, 81.2, 80.4, 79.0, 78.9, 77.3, 77.2, 76.6, 76.0, 75.2, 74.5, 74.3, 74.1, 73.6, 72.8, 72.6, 72.4, 71.0, 70.7, 70.7, 70.3, 70.2, 70.1(6), 68.9, 68.7, 68.7, 68.3, 68.1, 67.6, 66.4, 63.3, 62.5, 61.6, 61.4, 61.3, 60.7, 59.9, 56.4, 56.2, 56.1, 55.7, 54.9, 54.4, 54.4, 54.3, 50.8, 50.3, 40.0, 39.9(8),



34.5, 31.4, 30.9, 27.5, 27.1, 23.3, 23.1, 23.0, 22.7, 22.6(5), 20.1, 20.0, 19.3, 18.6, 17.5, 16.20. MALDI-TOF MS *m/z* calcd for C<sub>92</sub>H<sub>159</sub>N<sub>14</sub>O<sub>53</sub> [M+H<sup>+</sup>] 2307, found 2308.

**GlcNAc $\beta$ 3Gal $\beta$ 4GlcNAc $\beta$ 2Man $\alpha$ 3(GlcNAc $\beta$ 3Gal $\beta$ 4GlcNAc $\beta$ 2Man $\alpha$ 6)Man $\beta$ 4GlcNAc $\beta$ 4GlcNAc $\beta$ -(KVA)NKT (53b)**

Compound **53a** (6 mg, 2.63  $\mu$ mol) was treated with a mixture of 0.05 mU of HP  $\beta$ 3GlcNAcT and UDP-GlcNAc (3.4 mg, 4.0 equiv.) in 263  $\mu$ L buffer (50 mM HEPES-NaOH buffer, pH 7.2, with 25 mM KCl, 1 mM DTT, 2 mM MnCl<sub>2</sub>, 100 mU/mL of calf intestine alkaline phosphatase). The reaction mixture was incubated overnight at 37 °C. The insoluble precipitates were removed by centrifugation and the supernatant was concentrated, purified by Sephadex<sup>TM</sup> G-25 and lyophilized to give the final product as a white powder (6.5 mg, 92 % yield). <sup>1</sup>H NMR (600 MHz, D<sub>2</sub>O):  $\delta$  = 4.98 (s, 1H, H-1<sub>Man</sub>), 4.91 (d, *J* = 9.6 Hz, 1H, H-1<sub>Gn</sub>), 4.80 (s, 1H, H-1<sub>Man</sub>), 4.63 (s, 1H, H-1<sub>Man</sub>), 4.60-4.51 (m, 3H), 4.48 (d, *J* = 7.6 Hz, 1H, H-1<sub>Gn</sub>), 4.44 (d, *J* = 7.9 Hz, 2H, 2 H-1<sub>Gn</sub>), 4.32 (d, *J* = 7.8 Hz, 1H, H-1<sub>Gal</sub>), 4.31 (d, *J* = 7.8 Hz, 1H, H-1<sub>Gal</sub>), 4.26 (m, 1H, H-1<sub>Lys</sub>), 4.16 (q, *J* = 7.2 Hz, 1H, H-1<sub>Ala</sub>), 4.12 (s, 1H, H-2<sub>Man</sub>), 4.08 (m, 1H, H-2<sub>Thr</sub>), 4.06 (s, 1H, H-2<sub>Man</sub>), 4.04-4.01 (s, 2H), 4.00 (d, *J* = 4.2 Hz, 1H, H-1<sub>Thr</sub>), 3.99-3.95 (m, 2H), 3.88 – 3.25 (m, 62H), 2.91 – 2.78 (m, 4H), 2.73 (dd, *J* = 5.0, 16.0 Hz, 1H, H-2<sub>Asn</sub>), 2.61 (dd, *J* = 7.6, 16.0 Hz, 1H, H-2<sub>Asn</sub>), 1.99 (m, 1H), 1.94 (s, 3H), 1.92 (s, 3H), 1.91 (s, 3H), 1.90(6) (s, 3H), 1.90(2) (s, 3H), 1.87 (s, 3H), 1.76 (m, 1H), 1.63 (m, 1H), 1.59 – 1.41 (m, 6H), 1.40-1.19 (m, 4H), 1.24 (d, *J* = 7.1 Hz, 3H<sub>Ala</sub>), 1.04 (d, *J* = 6.4 Hz, 3H<sub>Thr</sub>), 0.83 (d, *J* = 6.8 Hz, 6H<sub>Val</sub>); <sup>13</sup>C NMR (150 MHz, D<sub>2</sub>O):  $\delta$  = 178.4, 177.2, 175.6, 175.4, 175.3, 175.2, 173.8, 173.0, 172.7, 164.3, 103.6, 102.0, 101.1, 100.4, 100.2, 100.1, 97.7, 82.7, 81.1, 80.1, 79.0, 78.8, 77.0, 76.8, 76.3, 75.5, 75.4, 75.0, 74.2, 73.5, 72.7, 72.6, 70.8, 70.6, 70.3, 70.1, 69.0, 68.5, 68.0, 66.3, 62.3, 61.6, 61.3, 61.1, 60.6, 59.9, 56.3, 55.6, 55.4, 54.7, 54.3, 50.6, 50.2, 40.0, 39.9, 34.5, 31.7, 31.2, 30.7, 27.8, 27.4, 27.3, 27.2, 23.0, 22.9, 22.8, 22.7(9), 22.6, 22.5(9), 20.0, 19.1, 18.5, 18.2, 17.3. MALDI-TOF MS *m/z* calcd for C<sub>106</sub>H<sub>182</sub>N<sub>15</sub>O<sub>64</sub> [M+H<sup>+</sup>] 2688, found 2689.

**Gal $\beta$ 4GlcNAc $\beta$ 3Gal $\beta$ 4GlcNAc $\beta$ 2Man $\alpha$ 3(Gal $\beta$ 4GlcNAc $\beta$ 3Gal $\beta$ 4GlcNAc $\beta$ 2Man $\alpha$ 6)Man $\beta$ 4GlcNAc $\beta$ 4GlcNAc $\beta$ -(KVA)NKT (56a)**

Compound **53b** (3.4 mg, 1.26  $\mu$ mol) was treated with a mixture of 0.03 mU of GalT1 and UDP-Gal (3.1 mg, 4.0 equiv.) in 125  $\mu$ L buffer (50 mM Tris-HCl buffer, pH 7.5, with 0.1 mg/mL BSA, 20 mM MnCl<sub>2</sub>, 100 mU/mL of calf intestine alkaline phosphatase). The reaction mixture was incubated overnight at 37°C. The insoluble precipitates were removed by centrifugation and the supernatant was concentrated, purified by Sephadex<sup>TM</sup> G-25 and lyophilized to give the final product as a white powder (3.4 mg, 92 % yield). <sup>1</sup>H NMR (500 MHz, D<sub>2</sub>O):  $\delta$  = 5.13 (s, 1H, H-1<sub>Man</sub>), 5.06 (d, *J* = 9.8 Hz, 1H, H-1<sub>Gn</sub>), 4.94 (s, 1H, H-1<sub>Man</sub>), 4.87 (s, 1H, H-1<sub>Man</sub>), 4.76 – 4.68 (m, 3H), 4.63 (d, *J* = 7.7 Hz, 1H, H-1<sub>Gn</sub>), 4.60 (d, *J* = 7.8 Hz, 2H, H-1<sub>Gn</sub>), 4.52-4.44 (m, 4H, H-1<sub>Gal</sub>), 4.41 (dd, *J* = 7.8, 9.6 Hz, 1H, H-1<sub>Lys</sub>), 4.33 (q, *J* = 7.1 Hz, 1H, H-1<sub>Ala</sub>), 4.27 (s, 1H, H-2<sub>Man</sub>), 4.23 (m, 1H, H-1<sub>Thr</sub>), 4.21 (s, 1H, H-1<sub>Man</sub>), 4.20 – 4.16 (m, 2H), 4.15 (d, *J* = 4.0 Hz, 1H, H-1<sub>Thr</sub>), 4.14-4.11 (m, 2H), 4.06 – 3.40 (m, 74H), 3.02 – 2.90 (m, 4H, H-5<sub>Lys</sub>), 2.91 – 2.84 (dd, *J* = 6.6, 16.3 Hz, 1H, H-2<sub>Asn</sub>), 2.76 (dd, *J* = 7.7, 16.3 Hz, 1H, H-2<sub>Asn</sub>), 2.10 (s, 3H), 2.09 (m, 1H), 2.07 (s, 3H), 2.06 (s, 3H), 2.05(5) (s, 3H), 2.05(3) (s, 3H), 2.02 (s, 3H), 1.91 (m, 1H), 1.78 (m, 1H), 1.72-1.56 (m, 6H), 1.54 – 1.32 (m, 4H), 1.39 (d, *J* = 7.1 Hz, 3H<sub>Ala</sub>), 1.19 (d, *J* = 6.3 Hz, 3H<sub>Thr</sub>), 0.98 (d, *J* = 6.7 Hz, 6H<sub>Val</sub>); <sup>13</sup>C NMR (125 MHz, D<sub>2</sub>O):  $\delta$  = 176.8, 175.3, 175.1, 174.8, 173.5, 172.3, 103.4, 103.3, 103.2(5), 103.1, 101.7, 100.8, 100.0, 99.9, 97.4, 82.5, 80.8, 79.8, 79.8, 78.9, 78.6, 76.8, 76.7, 76.6, 75.7, 75.3, 75.1, 74.9, 73.9, 73.3, 72.9, 72.6, 72.5, 72.4, 72.3, 71.3, 70.6, 70.3, 69.8, 69.8, 68.9, 68.7, 68.3, 67.7, 66.0, 62.0, 61.4, 61.3, 61.0, 60.4, 60.3, 59.6, 55.6, 55.3, 55.2, 54.5, 54.0, 49.9, 39.8, 34.2, 30.9, 30.5, 22.7, 22.6, 22.6, 22.5, 22.3, 18.9, 18.2, 17.1; MALDI-TOF MS: [M+H<sup>+</sup>] C<sub>118</sub>H<sub>202</sub>N<sub>15</sub>O<sub>74</sub>, calcd 3012, found 3013.

**Neu5Ac $\alpha$ 3Gal $\beta$ 4GlcNAc $\beta$ 3Gal $\beta$ 4GlcNAc $\beta$ 2Man $\alpha$ 3(Neu5Ac $\alpha$ 3Gal $\beta$ 4GlcNAc $\beta$ 3Gal $\beta$ 4GlcNAc $\beta$ 2Man $\alpha$ 6)Man $\beta$ 4GlcNAc $\beta$ 4GlcNAc $\beta$ -(KVA)NKT (56)**

Compound **56a** (0.5 mg, 0.166  $\mu$ mol), CMP-Neu5Ac (0.44 mg, 4.0 equiv.), and rST3Gal-III (1.5 mU) were dissolved in 33  $\mu$ L buffer (50 mM Tris-HCl, pH 7.5, with 100 mU/mL of calf intestine alkaline phosphatase). After incubation overnight at 37°C, the insoluble precipitates were removed by centrifugation and the supernatant was concentrated and purified by Sephadex<sup>TM</sup> G-25 and lyophilized to give the final product as a white powder (0.57 mg, 95 % yield). <sup>1</sup>H NMR (600 MHz, D<sub>2</sub>O):  $\delta$  = 5.10 (s, 1H), 5.03 (d, *J* = 9.6 Hz, 1H), 4.91 (s, 1H), 4.75 (s, 1H), 4.70 – 4.63 (m, 3H), 4.62 – 4.50 (m, 5H), 4.47 – 4.42 (m, 2H), 4.39 (dd, *J* = 3.6, 6.6 Hz, 1H), 4.29 (q, *J* = 7.1 Hz, 1H), 4.26 – 4.04 (m, 10H), 3.99 – 3.44 (m, 86H), 2.99 (t, *J* = 7.6 Hz, 4H), 2.85 (dd, *J*

= 16.3, 5.0 Hz, 1H), 2.79 – 2.72 (m, 3H), 2.10 – 1.95 (m, 25H), 1.92 – 1.84 (m, 1H), 1.84 – 1.73 (m, 5H), 1.72 – 1.63 (m, 4H), 1.45 – 1.27 (m, 7H), 1.16 (d,  $J = 6.5$  Hz, 3H), 0.96 (d,  $J = 6.8$  Hz, 6H); MALDI-TOF MS:  $[M+H^+]$  C<sub>140</sub>H<sub>236</sub>N<sub>17</sub>O<sub>90</sub>, calcd 3594, found 3595.

**Neu5Ac $\alpha$ 6Gal $\beta$ 4GlcNAc $\beta$ 3Gal $\beta$ 4GlcNAc $\beta$ 2Man $\alpha$ 3(Neu5Ac $\alpha$ 6Gal $\beta$ 4GlcNAc $\beta$ 3Gal $\beta$ 4GlcNAc $\beta$ 2Man $\alpha$ 6)Man $\beta$ 4GlcNAc $\beta$ 4GlcNAc $\beta$ -(KVA)NKT (118).**

Compound **56a** (0.5 mg, 0.166  $\mu$ mol), CMP-Neu5Ac (0.44 mg, 4.0 equiv.), and hST6Gal-I (3.3 mU) were dissolved in 33  $\mu$ L buffer (50 mM Tris-HCl, pH 7.5, with 100 mU/mL of calf intestine alkaline phosphatase). After incubation overnight at 37°C, the insoluble precipitates were removed by centrifugation and the supernatant was concentrated and purified by Sephadex<sup>TM</sup> G-25 and lyophilized to give the final product as a white powder (0.5 mg, 83 % yield). <sup>1</sup>H NMR (600 MHz, D<sub>2</sub>O):  $\delta = 5.10$  (s, 1H), 5.03 (d,  $J = 9.6$  Hz, 1H), 4.91 (s, 1H), 4.75 (s, 1H), 4.71 (d,  $J = 8.0$  Hz, 2H), 4.68 – 4.63 (m, 1H), 4.60 (d,  $J = 8.0$  Hz, 1H), 4.56 (d,  $J = 7.5$  Hz, 2H), 4.48 – 4.42 (m, 4H), 4.39 (t,  $J = 7.2$  Hz, 1H), 4.29 (q,  $J = 7.1$  Hz, 1H), 4.26 – 4.07 (m, 9H), 4.07 – 3.42 (m, 87H), 3.02 – 2.98 (m, 3H), 2.85 (dd,  $J = 16.1, 4.9$  Hz, 1H), 2.75 (dd,  $J = 16.8, 7.8$  Hz, 1H), 2.66 (dd,  $J = 12.3, 4.4$  Hz, 2H), 2.11 – 1.96 (m, 25H), 1.93 – 1.83 (m, 2H), 1.79 – 1.62 (m, 5H), 1.50 – 1.39 (m, 3H), 1.37 (d,  $J = 7.3$  Hz, 3H), 1.30 – 1.20 (m, 1H), 1.16 (d,  $J = 6.5$  Hz, 3H), 0.96 (d,  $J = 6.2$  Hz, 6H); MALDI-TOF MS: permethylated  $[M-ThrLysVal + Na^+]$  C<sub>181</sub>H<sub>319</sub>N<sub>13</sub>O<sub>86</sub>Na, calcd 4072, found 4072.9.

**GlcNAc $\beta$ 3Gal $\beta$ 4GlcNAc $\beta$ 3Gal $\beta$ 4GlcNAc $\beta$ 2Man $\alpha$ 3(GlcNAc $\beta$ 3Gal $\beta$ 4GlcNAc $\beta$ 3Gal $\beta$ 4GlcNAc $\beta$ 2Man $\alpha$ 6)Man $\beta$ 4GlcNAc $\beta$ 4GlcNAc $\beta$ -(KVA)NKT (56b)**

This compound was made by the same method used in the preparation of **53b**. Started from 6.0 mg **56a**, 93 % yield. <sup>1</sup>H NMR (600 MHz, D<sub>2</sub>O):  $\delta = 5.09$  (s, 1H, H-1<sub>Man</sub>), 5.02 (d,  $J = 9.7$  Hz, 1H, H-1<sub>Gn</sub>), 4.91 (s, 1H, H-1<sub>Man</sub>), 4.74 (s, 1H, H-1<sub>Man</sub>), 4.70-4.63 (m, 5H, H-1<sub>Asn</sub>, 4 H-1<sub>Gn</sub>), 4.59 (d,  $J = 8.0$  Hz, 1H, H-1<sub>Gn</sub>), 4.56 (d,  $J = 7.7$  Hz, 2H, H-1<sub>Gn</sub>), 4.47-4.40 (m, 4H, H-1<sub>Gal</sub>), 4.38 (dd,  $J = 6.2, 8.1$  Hz, 1H, H-1<sub>Lys</sub>), 4.28 (q,  $J = 7.1$  Hz, 1H, H-1<sub>Ala</sub>), 4.23 (s, 1H, H-2<sub>Man</sub>), 4.20 (dd,  $J = 4.2, 6.4$  Hz, 1H, H-2<sub>Thr</sub>), 4.17 (d,  $J = 2.8$  Hz, 1H, H-2<sub>Man</sub>), 4.15 – 4.12 (m, 4H), 4.11 (d,  $J = 4.2$  Hz, 1H, H-1<sub>Thr</sub>), 4.10-4.07 (m, 2H), 3.99 – 3.51 (m, 77H), 3.50-3.40 (m, 7H), 2.97 – 2.86 (m, 4H), 2.85 (dd,  $J = 5.4, 16.2$  Hz, 1H, H-2<sub>Asn</sub>), 2.73 (dd,  $J = 7.7, 16.2$  Hz, 1H, H-2<sub>Asn</sub>), 2.06 (s, 3H), 2.05 (m, 1H), 2.03 (s, 3H), 2.02 (s, 3H), 2.02 (s, 9H), 2.01 (s, 3H), 1.98 (s, 3H), 1.87 (m, 1H), 1.74 (m, 1H), 1.69 – 1.52 (m, 6H), 1.50 – 1.20 (m, 4H), 1.36 (d,  $J = 7.1$  Hz, 3H<sub>Ala</sub>), 1.15 (d,  $J = 6.4$  Hz, 3H<sub>Thr</sub>), 0.94 (d,  $J = 6.7$  Hz, 6H<sub>Val</sub>); <sup>13</sup>C NMR (150 MHz, D<sub>2</sub>O):  $\delta = 178.6, 177.2, 175.8, 175.7, 175.5, 175.4, 175.3, 173.9, 173.8(8), 173.1, 172.8, 103.8, 103.7, 103.6(6), 103.5(6), 102.1, 101.2, 100.3, 100.2, 100.2(2), 97.8, 82.8, 82.7(7), 81.2, 80.2, 79.4, 79.3, 79.0, 78.9, 77.2, 77.1, 77.0, 76.4, 75.7, 75.5, 75.4, 75.3, 75.2, 74.3, 73.7, 73.0, 72.9, 72.8, 72.7, 71.0, 70.8, 70.7, 70.5, 70.2, 70.1, 69.1, 68.7, 68.1, 68.0, 66.4, 62.5, 62.4, 61.8, 61.4, 61.2, 60.7, 60.6, 60.0, 56.4, 55.9, 55.7, 55.6, 54.9, 54.5, 50.8, 50.3, 40.2, 40.2, 37.2, 34.7, 31.3, 30.9, 28.5, 27.9, 23.1, 23.0, 22.9(7), 22.9(4), 22.9(1), 22.8, 22.7, 20.0, 19.3, 18.6, 17.5. MALDI-TOF MS:  $[M+H^+]$  C<sub>134</sub>H<sub>228</sub>N<sub>17</sub>O<sub>84</sub>, calcd 3418, found 3419.$

**Gal $\beta$ 4GlcNAc $\beta$ 3Gal $\beta$ 4GlcNAc $\beta$ 3Gal $\beta$ 4GlcNAc $\beta$ 2Man $\alpha$ 3(Gal $\beta$ 4GlcNAc $\beta$ 3Gal $\beta$ 4GlcNAc $\beta$ 3Gal $\beta$ 4GlcNAc $\beta$ 2Man $\alpha$ 6)Man $\beta$ 4GlcNAc $\beta$ 4GlcNAc $\beta$ -(KVA)NKT (57a)**

This compound was made by the same method used in the preparation of **56a**. Started from 5.8 mg **56b**, 87% yield. <sup>1</sup>H NMR (600 MHz, D<sub>2</sub>O):  $\delta = 5.10$  (s, 1H, H-1<sub>Man</sub>), 5.03 (d,  $J = 9.4$  Hz, 1H, H-1<sub>Gn</sub>), 4.91 (s, 1H, H-1<sub>Man</sub>), 4.75 (s, 1H, H-1<sub>Man</sub>), 4.72-4.63 (m, 5H, H-1<sub>Asn</sub>, 4 H-1<sub>Gn</sub>), 4.60 (d,  $J = 8.4$  Hz, 1H, H-1<sub>Gn</sub>), 4.56 (d,  $J = 7.5$  Hz, 2H, H-1<sub>Gn</sub>), 4.48-4.41 (m, 6H, H-1<sub>Gal</sub>), 4.38 (dd,  $J = 6.0, 7.8$  Hz, 1H, H-1<sub>Lys</sub>), 4.29 (q,  $J = 6.9$  Hz, 1H, H-1<sub>Ala</sub>), 4.24 (s, 1H, H-2<sub>Man</sub>), 4.20 (m, 1H, H-2<sub>Thr</sub>), 4.18 (s, 1H, H-2<sub>Man</sub>), 4.16 – 4.13 (m, 6H), 4.12 (d,  $J = 4.2$  Hz, 1H, H-1<sub>Thr</sub>), 4.11-4.06 (m, 2H, H-1<sub>Val</sub>, H-2<sub>Man</sub>), 4.00 – 3.40 (m, 94H), 3.03-2.90 (m, 4H, H-5<sub>Lys</sub>), 2.85 (dd,  $J = 6.6, 18.6$  Hz, 1H, H-2<sub>Asn</sub>), 2.73 (dd,  $J = 8.4, 18.6$  Hz, 1H, H-2<sub>Asn</sub>), 2.10 (m, 1H, H-2<sub>Val</sub>), 2.06 (s, 3H), 2.03 (s, 3H), 2.02(8) (s, 3H), 2.02 (s, 12H), 1.99 (s, 3H), 1.91 – 1.84 (m, 1H), 1.79 – 1.71 (m, 1H), 1.70 – 1.54 (m, 6H), 1.50-1.33 (m, 4H), 1.36 (d,  $J = 7.2$  Hz, 3H<sub>Ala</sub>), 1.15 (d,  $J = 6.4$  Hz, 3H<sub>Thr</sub>), 0.95 (d,  $J = 6.7$  Hz, 6H<sub>Val</sub>); <sup>13</sup>C NMR (150 MHz, D<sub>2</sub>O):  $\delta = 178.5, 177.3, 175.7, 175.5, 175.4, 175.3, 173.8(9), 173.8(6), 173.1, 172.8, 103.8, 103.7(4), 103.6(7), 103.6(5), 103.5(7), 102.1, 101.2, 100.4, 100.2, 97.8, 82.9, 81.2, 80.3, 79.3, 78.9, 77.2, 77.1, 77.0, 76.1, 75.7, 75.5, 75.3, 75.2, 74.3, 73.7, 73.3, 73.0, 72.9, 72.7, 71.8, 71.0, 70.7, 70.2, 69.3, 69.1, 68.7, 68.1, 66.4, 62.5, 61.8, 61.8, 61.4, 60.6, 60.0, 56.0, 55.9, 55.7, 55.6, 54.9, 54.4, 50.8, 50.3, 40.1, 40.1, 34.6, 31.3, 30.9, 27.4, 23.1, 23.0, 22.9(5), 22.9, 22.7, 22.6(8), 20.1, 19.3, 18.6, 17.5; MALDI-TOF MS:  $[M+H^+]$  C<sub>146</sub>H<sub>248</sub>N<sub>17</sub>O<sub>94</sub>, calcd 3742, found 3745.$



**Neu5Ac $\alpha$ 3Gal $\beta$ 4GlcNAc $\beta$ 3Gal $\beta$ 4GlcNAc $\beta$ 3Gal $\beta$ 4GlcNAc $\beta$ 2Man $\alpha$ 3(Neu5Ac $\alpha$ 3Gal $\beta$ 4GlcNAc $\beta$ 3Gal $\beta$ 4GlcNAc $\beta$ 3Gal $\beta$ 4GlcNAc $\beta$ 2Man $\alpha$ 6)Man $\beta$ 4GlcNAc $\beta$ 4GlcNAc $\beta$ -(KVA)NKT (57)**

Compound **57a** (0.5 mg, 0.133  $\mu$ mol), CMP-Neu5Ac (0.4 mg, 4.0 equiv.), and rST3Gal-III (3 mU) were dissolved in 133  $\mu$ L buffer (50 mM Tris-HCl, pH 7.5, with 100 mU/mL of calf intestine alkaline phosphatase). After incubation overnight at 37°C, the insoluble precipitates were removed by centrifugation and the supernatant was concentrated and purified by Sephadex<sup>TM</sup> G-25 and lyophilized to give the final product as a white powder (0.5 mg, 87 % yield).

<sup>1</sup>H NMR (600 MHz, D<sub>2</sub>O):  $\delta$  = 5.10 (s, 1H), 5.03 (d,  $J$  = 10.1 Hz, 1H), 4.91 (s, 1H), 4.75 (s, 1H), 4.72 – 4.63 (m, 5H), 4.62 – 4.50 (m, 5H), 4.48 – 4.42 (m, 4H), 4.39 (t,  $J$  = 7.1 Hz, 1H), 4.29 (q,  $J$  = 7.3 Hz, 1H), 4.26 – 4.05 (m, 14H), 4.01 – 3.40 (m, 106H), 2.99 (t,  $J$  = 7.2 Hz, 4H), 2.89 – 2.81 (m, 1H), 2.79 – 2.67 (m, 3H), 2.14 – 1.93 (m, 31H), 1.93 – 1.81 (m, 2H), 1.79 (t,  $J$  = 12.2 Hz, 2H), 1.73 – 1.65 (m, 4H), 1.50 – 1.39 (m, 4H), 1.37 (d,  $J$  = 7.3 Hz, 3H), 1.16 (d,  $J$  = 6.2 Hz, 3H), 0.96 (d,  $J$  = 6.4 Hz, 6H); MALDI-TOF MS: [M+H<sup>+</sup>] C168H282N19O110, calcd 4324, found 4324.

**Neu5Ac $\alpha$ 6Gal $\beta$ 4GlcNAc $\beta$ 3Gal $\beta$ 4GlcNAc $\beta$ 3Gal $\beta$ 4GlcNAc $\beta$ 2Man $\alpha$ 3(Neu5Ac $\alpha$ 6Gal $\beta$ 4GlcNAc $\beta$ 3Gal $\beta$ 4GlcNAc $\beta$ 3Gal $\beta$ 4GlcNAc $\beta$ 2Man $\alpha$ 6)Man $\beta$ 4GlcNAc $\beta$ 4GlcNAc $\beta$ -(KVA)NKT (120)**

Compound **57a** (0.5 mg, 0.133  $\mu$ mol), CMP-Neu5Ac (0.4 mg, 4.0 equiv.), and hST6Gal-I (2 mU) were dissolved in 133  $\mu$ L buffer (50 mM Tris-HCl, pH 7.5, with 100 mU/mL of calf intestine alkaline phosphatase). After incubation overnight at 37°C, the insoluble precipitates were removed by centrifugation and the supernatant was concentrated and purified by Sephadex<sup>TM</sup> G-25 and lyophilized to give the final product as a white powder (0.5 mg, 87 % yield).

<sup>1</sup>H NMR (600 MHz, D<sub>2</sub>O):  $\delta$  = 5.10 (s, 1H), 5.03 (d,  $J$  = 9.6 Hz, 1H), 4.91 (s, 1H), 4.73 – 4.63 (m, 6H), 4.63 – 4.53 (m, 3H), 4.49 – 4.42 (m, 6H), 4.39 (t,  $J$  = 7.1 Hz, 1H), 4.29 (q,  $J$  = 6.7 Hz, 1H), 4.26 – 4.06 (m, 11H), 4.02 – 3.42 (m, 109H), 3.06 – 2.92 (m, 4H), 2.90 – 2.81 (m, 1H), 2.79 – 2.71 (m, 1H), 2.66 (dd,  $J$  = 12.4, 4.7 Hz, 2H), 2.10 – 1.94 (m, 31H), 1.92 – 1.82 (m, 2H), 1.80 – 1.62 (m, 7H), 1.50 – 1.38 (m, 3H), 1.37 (d,  $J$  = 7.3 Hz, 3H), 1.16 (d,  $J$  = 6.6 Hz, 3H), 0.96 (d,  $J$  = 6.7 Hz, 6H); MALDI-TOF MS: [M+H<sup>+</sup>] C168H282N19O110, calcd 4324, found 4327.

**GlcNAc $\beta$ 3Gal $\beta$ 4GlcNAc $\beta$ 3Gal $\beta$ 4GlcNAc $\beta$ 3Gal $\beta$ 4GlcNAc $\beta$ 2Man $\alpha$ 3(GlcNAc $\beta$ 3Gal $\beta$ 4GlcNAc $\beta$ 3Gal $\beta$ 4GlcNAc $\beta$ 3Gal $\beta$ 4GlcNAc $\beta$ 2Man $\alpha$ 6)Man $\beta$ 4GlcNAc $\beta$ 4GlcNAc $\beta$ -(KVA)NK (57b)**

This compound was made by the same method used in the preparation of **53b**. Started from 10.5 mg **57a**, 100% yield. MALDI-TOF MS: [M+H<sup>+</sup>] C152H255N16O101, calcd 3919, found 3921.

**Gal $\beta$ 4GlcNAc $\beta$ 3Gal $\beta$ 4GlcNAc $\beta$ 3Gal $\beta$ 4GlcNAc $\beta$ 3Gal $\beta$ 4GlcNAc $\beta$ 2Man $\alpha$ 3(Gal $\beta$ 4GlcNAc $\beta$ 3Gal $\beta$ 4GlcNAc $\beta$ 3Gal $\beta$ 4GlcNAc $\beta$ 3Gal $\beta$ 4GlcNAc $\beta$ 2Man $\alpha$ 6)Man $\beta$ 4GlcNAc $\beta$ 4GlcNAc $\beta$ -(KVA)NK (58a)**

This compound was made by the same method used in the preparation of **56a**. Started from 10.1 mg **57b**, 91% yield; <sup>1</sup>H NMR (600 MHz, D<sub>2</sub>O):  $\delta$  = 5.09 (s, 1H, H-1<sub>Man</sub>), 5.02 (d,  $J$  = 9.7 Hz, 1H, H-1<sub>Gn</sub>), 4.91 (s, 1H, H-1<sub>Man</sub>), 4.74 (s, 1H, H-1<sub>Man</sub>), 4.68 (d,  $J$  = 8.1 Hz, 7H, H-1<sub>Asn</sub>, 6 H-1<sub>Gn</sub>), 4.59 (d,  $J$  = 7.5 Hz, 1H, H-1<sub>Gn</sub>), 4.56 (d,  $J$  = 7.1 Hz, 2H, H-1<sub>Gn</sub>), 4.45-4.38 (m, 9H), 4.34 (q,  $J$  = 7.2 Hz, 1H, 1H, H-1<sub>Ala</sub>), 4.23 (s, 1H, H-2<sub>Man</sub>), 4.17 (s, 1H, H-2<sub>Man</sub>), 4.16-4.11 (m, 6H), 4.11-4.07 (m, 2H, H-1<sub>Val</sub>, H-2<sub>Man</sub>), 4.00 – 3.40 (m, 117H), 3.01-2.93 (m, 2H, H-5<sub>Lys</sub>), 2.80 – 2.60 (m, 2H, H-2<sub>Asn</sub>), 2.10 (m, 1 H, H-2<sub>Val</sub>), 2.06 (s, 3H), 2.03 (s, 3H), 2.02 (s, 3H), 2.01 (s, 15H), 1.99 (s, 3H), 1.89 (s, 3H), 1.69-1.55 (m, 3H), 1.37 (d,  $J$  = 7.5 Hz, 3H<sub>Ala</sub>), 1.38-1.28 (m, 3H), 0.94 (d,  $J$  = 6.8 Hz, 6H<sub>Val</sub>); <sup>13</sup>C NMR (150 MHz, D<sub>2</sub>O):  $\delta$  = 182.3, 178.4, 177.4, 175.7, 175.6, 175.5, 175.4, 174.2, 173.8, 103.7, 103.7, 103.6, 103.6, 102.1, 101.2, 100.3, 100.2, 97.8, 82.9, 81.2, 80.2, 79.4, 79.3, 78.9, 77.2, 77.1, 77.0, 76.1, 75.7, 75.5, 75.5, 75.3, 75.2, 74.3, 73.7, 73.6, 73.3, 73.0, 72.9, 72.8, 72.7, 71.8, 71.0, 70.8, 70.2, 69.3, 69.1, 68.1, 66.4, 62.5, 62.4, 61.8, 61.7(5), 60.7, 60.6, 60.1, 56.0, 55.9(3), 55.7, 55.6, 54.8, 54.5, 52.2, 50.3, 40.1, 38.6, 34.6, 30.9, 27.6, 24.1, 23.1, 23.0, 22.9(6), 22.9, 22.7, 19.3, 18.5, 17.6; MALDI-TOF MS: [M+Na<sup>+</sup>] C164H274N16O111Na, calcd 4265, found 4267.

**Neu5Ac $\alpha$ 3Gal $\beta$ 4GlcNAc $\beta$ 3Gal $\beta$ 4GlcNAc $\beta$ 3Gal $\beta$ 4GlcNAc $\beta$ 3Gal $\beta$ 4GlcNAc $\beta$ 2Man $\alpha$ 3(Neu5Ac $\alpha$ 3Gal $\beta$ 4GlcNAc $\beta$ 3Gal $\beta$ 4GlcNAc $\beta$ 3Gal $\beta$ 4GlcNAc $\beta$ 2Man $\alpha$ 6)Man $\beta$ 4GlcNAc $\beta$ 4GlcNAc $\beta$ -(KVA)NK (58)**

Compound **58a** (0.5 mg, 0.118  $\mu$ mol), CMP-Neu5Ac (0.3 mg, 4.0 equiv.), and rST3Gal-III (2 mU) were dissolved in 24  $\mu$ L buffer (50 mM Tris-HCl, pH 7.5, with 100 mU/mL of calf intestine alkaline phosphatase). After incubation overnight at 37°C, the insoluble precipitates were removed by centrifugation and the supernatant was concentrated and purified by Sephadex™ G-25 and lyophilized to give the final product as a white powder (0.5 mg, 88 % yield).

$^1\text{H}$  NMR (600 MHz,  $\text{D}_2\text{O}$ ):  $\delta$  = 5.10 (s, 1H), 5.03 (d,  $J$  = 9.6 Hz, 1H), 4.91 (s, 1H), 4.75 (s, 1H), 4.68 (d,  $J$  = 8.2 Hz, 4H), 4.62 – 4.51 (m, 6H), 4.49 – 4.39 (m, 9H), 4.35 (q,  $J$  = 7.1 Hz, 1H), 4.27 – 4.07 (m, 12H), 4.01 – 3.44 (m, 132H), 3.00 (t,  $J$  = 7.7 Hz, 2H), 2.80 – 2.66 (m, 4H), 2.10 – 1.95 (m, 37H), 1.94 – 1.85 (m, 2H), 1.79 (t,  $J$  = 12.1 Hz, 2H), 1.74 – 1.67 (m, 2H), 1.47 – 1.40 (m, 2H), 1.39 (d,  $J$  = 7.1 Hz, 3H), 0.96 (d,  $J$  = 6.8 Hz, 6H); MALDI-TOF MS:  $[\text{M}+\text{H}^+]$  C186H309N18O127, calcd 4825, found 4828.

**Neu5Ac $\alpha$ 6Gal $\beta$ 4GlcNAc $\beta$ 3Gal $\beta$ 4GlcNAc $\beta$ 3Gal $\beta$ 4GlcNAc $\beta$ 3Gal $\beta$ 4GlcNAc $\beta$ 2Man $\alpha$ 3(Neu5Ac $\alpha$ 6Gal $\beta$ 4GlcNAc $\beta$ 3Gal $\beta$ 4GlcNAc $\beta$ 3Gal $\beta$ 4GlcNAc $\beta$ 3Gal $\beta$ 4GlcNAc $\beta$ 2Man $\alpha$ 6)Man $\beta$ 4GlcNAc $\beta$ 4GlcNAc $\beta$ -(KVA)NK (121).**

Compound **58a** (0.5 mg, 0.118  $\mu$ mol), CMP-Neu5Ac (0.3 mg, 4.0 equiv.), and hST6Gal-I (2 mU) were dissolved in 24  $\mu$ L buffer (50 mM Tris-HCl, pH 7.5, with 100 mU/mL of calf intestine alkaline phosphatase). After incubation overnight at 37°C, the insoluble precipitates were removed by centrifugation and the supernatant was concentrated and purified by Sephadex™ G-25 and lyophilized to give the final product as a white powder (0.5 mg, 88 % yield).

$^1\text{H}$  NMR (600 MHz,  $\text{D}_2\text{O}$ ):  $\delta$  = 5.10 (s, 1H), 5.03 (d,  $J$  = 9.5 Hz, 1H), 4.91 (s, 1H), 4.75 (s, 1H), 4.73 – 4.65 (m, 6H), 4.63 – 4.52 (m, 4H), 4.50 – 4.38 (m, 9H), 4.35 (q,  $J$  = 7.0 Hz, 1H), 4.24 (s, 1H), 4.20 – 4.11 (m, 10H), 4.10 (s, 1H), 4.03 – 3.42 (m, 132H), 3.00 (t,  $J$  = 7.7 Hz, 2H), 2.74 – 2.65 (m, 2H), 2.66 (dd,  $J$  = 12.3, 4.5 Hz, 2H), 2.10 – 1.95 (m, 37H), 1.92 – 1.82 (m, 2H), 1.71 (t,  $J$  = 12.0 Hz, 2H), 1.70 – 1.67 (m, 2H), 1.40 (d,  $J$  = 7.1 Hz, 3H), 0.96 (d,  $J$  = 6.8 Hz, 6H); MALDI-TOF MS:  $[\text{M}+\text{H}^+]$  C186H309N18O127, calcd 4825, found 4828.

**GlcNAc $\beta$ 3Gal $\beta$ 4GlcNAc $\beta$ 3Gal $\beta$ 4GlcNAc $\beta$ 3Gal $\beta$ 4GlcNAc $\beta$ 3Gal $\beta$ 4GlcNAc $\beta$ 2Man $\alpha$ 3(GlcNAc $\beta$ 3Gal $\beta$ 4GlcNAc $\beta$ 3Gal $\beta$ 4GlcNAc $\beta$ 3Gal $\beta$ 4GlcNAc $\beta$ 3Gal $\beta$ 4GlcNAc $\beta$ 2Man $\alpha$ 6)Man $\beta$ 4GlcNAc $\beta$ 4GlcNAc $\beta$ -(KVA)NK (58b)**

This compound was made by the same method used in the preparation of **53b**. Started from 5.1 mg **58a**, 95% yield.  $^1\text{H}$  NMR (600 MHz,  $\text{D}_2\text{O}$ ):  $\delta$  = 5.10 (s, 1H, H-1<sub>Man</sub>), 5.03 (d,  $J$  = 9.6 Hz, 1H, H-1<sub>Gn</sub>), 4.91 (s, 1H, H-1<sub>Man</sub>), 4.75 (s, 1H, H-1<sub>Man</sub>), 4.72-4.63 (m, 9H, 8 H-1<sub>Gn</sub>, H-1<sub>Asn</sub>), 4.60 (d,  $J$  = 7.8 Hz, 1H, H-1<sub>Gn</sub>), 4.56 (d,  $J$  = 6.7 Hz, 2H, H-1<sub>Gn</sub>), 4.50-4.39 (m, 9H, 8 H-1<sub>Gal</sub>, H-1<sub>Lys</sub>), 4.35 (q,  $J$  = 7.2 Hz, 1H, H-1<sub>Ala</sub>), 4.23 (s, 1H, H-2<sub>Man</sub>), 4.17 (s, 1H, H-2<sub>Man</sub>), 4.14 (m, 6H), 4.11 (d,  $J$  = 7.6 Hz, 1H, H-1<sub>Val</sub>), 4.09 (s, 1H, H-2<sub>Man</sub>), 4.04 – 3.36 (m, 129H), 2.98 (t,  $J$  = 7.6 Hz, 2H, H-5<sub>Lys</sub>), 2.79 – 2.62 (m, 2H, H-2<sub>Asn</sub>), 2.12 (m, 1 H, H-2<sub>Val</sub>), 2.06 (s, 3H), 2.02 (m, 30H), 1.99 (s, 3H), 1.79 – 1.56 (m, 3H), 1.41-1.32 (m, 2H), 1.38 (d,  $J$  = 7.1 Hz, 3H<sub>Ala</sub>), 1.32 – 1.09 (m, 1H), 0.95 (d,  $J$  = 6.7 Hz, 6H<sub>Val</sub>);  $^{13}\text{C}$  NMR (150 MHz,  $\text{D}_2\text{O}$ ):  $\delta$  = 177.3, 175.8, 175.7, 175.6, 175.5, 175.4, 174.3, 174.2, 173.7, 103.7, 103.7, 103.6, 102.1, 101.2, 100.4, 100.2, 97.8, 82.9, 82.8, 81.2, 80.3, 79.5, 79.3, 78.9, 77.2, 77.1, 77.0, 76.4, 75.7, 75.5, 75.3, 75.2, 74.3, 73.7, 73.6, 73.0, 72.8, 72.7, 71.0, 70.8, 70.7(5), 70.5, 70.2, 69.1, 68.1, 66.4, 63.3, 62.4, 61.8, 61.3, 60.7, 60.6, 60.3, 58.2, 56.4, 55.9, 55.7, 55.6, 54.4, 52.2, 50.3, 40.0, 38.6, 33.7, 30.8, 27.3, 23.1, 23.0, 22.9(6), 22.9, 22.4, 19.2, 18.5, 17.6. MALDI-TOF MS:  $[\text{M}+\text{H}^+]$  C180H301N18O121, calcd 4649, found 4652.

**Gal $\beta$ 4GlcNAc $\beta$ 3Gal $\beta$ 4GlcNAc $\beta$ 3Gal $\beta$ 4GlcNAc $\beta$ 3Gal $\beta$ 4GlcNAc $\beta$ 3Gal $\beta$ 4GlcNAc $\beta$ 2Man $\alpha$ 3(Gal $\beta$ 4GlcNAc $\beta$ 3Gal $\beta$ 4GlcNAc $\beta$ 3Gal $\beta$ 4GlcNAc $\beta$ 3Gal $\beta$ 4GlcNAc $\beta$ 3Gal $\beta$ 4GlcNAc $\beta$ 2Man $\alpha$ 6)Man $\beta$ 4GlcNAc $\beta$ 4GlcNAc $\beta$ -(KVA)NK (59a)**

This compound was made by the same method used in the preparation of **56a**. Started from 4.5 mg **58b**, 100% yield.  $^1\text{H}$  NMR (600 MHz,  $\text{D}_2\text{O}$ ):  $\delta$  = 5.10 (s, 1H, H-1<sub>Man</sub>), 5.03 (d,  $J$  = 9.7 Hz, 1H, H-1<sub>Gn</sub>), 4.91 (s, 1H, H-1<sub>Man</sub>), 4.75 (s, 1H, H-1<sub>Man</sub>), 4.72-4.64 (m, 9H, H-1<sub>Asn</sub>, 8H-1<sub>Gn</sub>), 4.60 (d,  $J$  = 7.5 Hz, 1H, H-1<sub>Gn</sub>), 4.56 (d,  $J$  = 6.4 Hz, 2H, H-1<sub>Gn</sub>), 4.53 – 4.39 (m, 11H, 10 H-1<sub>Gal</sub>, H-1<sub>Lys</sub>), 4.35 (q,  $J$  = 7.2 Hz, 1H, H-1<sub>Ala</sub>), 4.24 (s, 1H, H-2<sub>Man</sub>), 4.17 (s, 1H, H-2<sub>Man</sub>), 4.16-4.13 (m, 8H), 4.11 (d,  $J$  = 7.6 Hz, 1H, H-1<sub>Val</sub>), 4.09 (s, 1H, H-2<sub>Man</sub>), 4.06 – 3.40 (m, 139H), 2.98 (t,  $J$  = 7.6 Hz, 2H, H-5<sub>Lys</sub>), 2.85 – 2.58 (m, 2H, H-2<sub>Asn</sub>), 2.10 (m, 1 H, H-2<sub>Val</sub>), 2.06 (s, 3H), 2.03 (s, 3H), 2.03 (s, 3H), 2.02 (m, 24H), 1.99 (s, 3H), 1.77 – 1.56 (m, 3H), 1.40-1.30 (m, 2H), 1.38 (d,  $J$  = 7.1 Hz, 3H<sub>Ala</sub>), 1.20 (m, 1H), 0.95 (d,  $J$  = 6.7 Hz, 6H<sub>Val</sub>);  $^{13}\text{C}$  NMR (150 MHz,  $\text{D}_2\text{O}$ ):  $\delta$  = 177.3, 175.7, 175.6, 175.5,

175.4, 174.2, 174.2, 173.7, 103.8, 103.7, 103.7, 103.6, 102.1, 101.2, 100.3, 100.2, 97.8, 82.9, 81.2, 80.2, 79.5, 79.3, 78.9, 77.2, 77.1, 77.0, 76.1, 75.7, 75.5, 75.3, 75.2, 74.3, 73.7, 73.3, 73.0, 71.8, 71.0, 70.8, 70.2, 69.3, 69.1, 68.1, 66.4, 63.3, 62.4, 61.8, 61.7(5), 60.7(1), 60.6, 60.2, 56.0, 55.9, 55.7, 55.6, 54.6, 54.5, 52.2, 50.3, 40.0, 38.6, 34.0, 30.9, 27.3, 23.1, 23.0, 22.9, 22.5, 19.2, 18.5, 17.6. MALDI-TOF MS:  $[M+H]^+$  C<sub>192</sub>H<sub>321</sub>N<sub>18</sub>O<sub>131</sub>, calcd 4973, found 4976.

**Neu5Ac $\alpha$ 3Gal $\beta$ 4GlcNAc $\beta$ 2Man $\alpha$ 3(Neu5Ac $\alpha$ 3Gal $\beta$ 4GlcNAc $\beta$ 2Man $\alpha$ 6)Man $\beta$ 4GlcNAc $\beta$ 4GlcNAc $\beta$ -(KVA)NK (59)**

Compound **59a** (0.5 mg, 0.1  $\mu$ mol), CMP-Neu5Ac (0.3 mg, 4.0 equiv.), and rST3Gal-III (1 mU) were dissolved in 20  $\mu$ L buffer (50 mM Tris-HCl, pH 7.5, with 100 mU/mL of calf intestine alkaline phosphatase). After incubation overnight at 37°C, the insoluble precipitates were removed by centrifugation and the supernatant was concentrated and purified by Sephadex<sup>TM</sup> G-25 and lyophilized to give the final product as a white powder (0.5 mg, 91 % yield). MALDI-TOF MS:  $[M+H]^+$  C<sub>214</sub>H<sub>355</sub>N<sub>20</sub>O<sub>147</sub>, calcd 5555, found 5557.

**Neu5Ac $\alpha$ 6Gal $\beta$ 4GlcNAc $\beta$ 3Gal $\beta$ 4GlcNAc $\beta$ 3Gal $\beta$ 4GlcNAc $\beta$ 3Gal $\beta$ 4GlcNAc $\beta$ 3Gal $\beta$ 4GlcNAc $\beta$ 2Man $\alpha$ 3(Neu5Ac $\alpha$ 6Gal $\beta$ 4GlcNAc $\beta$ 3Gal $\beta$ 4GlcNAc $\beta$ 3Gal $\beta$ 4GlcNAc $\beta$ 3Gal $\beta$ 4GlcNAc $\beta$ 3Gal $\beta$ 4GlcNAc $\beta$ 2Man $\alpha$ 6)Man $\beta$ 4GlcNAc $\beta$ 4GlcNAc $\beta$ -(KVA)NK (122)**

Compound **59a** (0.5 mg, 0.1  $\mu$ mol), CMP-Neu5Ac (0.3 mg, 4.0 equiv.), and hST6Gal-I (2 mU) were dissolved in 20  $\mu$ L buffer (50 mM Tris-HCl, pH 7.5, with 100 mU/mL of calf intestine alkaline phosphatase). After incubation overnight at 37°C, the insoluble precipitates were removed by centrifugation and the supernatant was concentrated and purified by Sephadex<sup>TM</sup> G-25 and lyophilized to give the final product as a white powder (0.5 mg, 91 % yield). MALDI-TOF MS:  $[M+H]^+$  C<sub>214</sub>H<sub>355</sub>N<sub>20</sub>O<sub>147</sub>, calcd 5555, found 5559.

**Gal $\beta$ 4GlcNAc $\beta$ 2Man $\alpha$ 3(Gal $\beta$ 4GlcNAc $\beta$ 2Man $\alpha$ 6)Man $\beta$ 4GlcNAc $\beta$ 4(Fuc $\alpha$ 6)GlcNAc $\beta$ -(KVA)NKT (8a)**

This compound was made by the same method used in the preparation of **56a**. Started from 5.5 mg **60c**, 92% yield. <sup>1</sup>H NMR (600 MHz, D<sub>2</sub>O):  $\delta$  = 5.10 (s, 1H, H-1<sub>Man</sub>), 5.03 (d,  $J$  = 9.6 Hz, 1H, H-1<sub>Gn</sub>), 4.91 (s, 1H, H-1<sub>Man</sub>), 4.86 (d,  $J$  = 3.4 Hz, 1H, H-1<sub>Fuc</sub>), 4.75 (s, 1H, H-1<sub>Man</sub>), 4.67 (overlapped, 1H, H-1<sub>Asn</sub>), 4.66 (d,  $J$  = 7.6 Hz, 1H, H-1<sub>Gn</sub>), 4.56 (d,  $J$  = 7.7 Hz, 2H, H-1<sub>Gn</sub>), 4.45 (d,  $J$  = 7.8 Hz, 1H, H-1<sub>Gal</sub>), 4.44 (d,  $J$  = 7.8 Hz, 1H, H-1<sub>Gal</sub>), 4.39 (m, 1H, H-1<sub>Lys</sub>), 4.29 (q,  $J$  = 7.2 Hz, 1H, H-1<sub>Ala</sub>), 4.24 (s, 1H, H-2<sub>Man</sub>), 4.21 (m, 1H, H-2<sub>Thr</sub>), 4.18 (s, 1H, H-2<sub>Man</sub>), 4.15 – 4.10 (m, 2H, H-1<sub>Thr</sub>, H-1<sub>Val</sub>), 4.09 (s, 1H, H-2<sub>Man</sub>), 4.02 – 3.42 (m, 56H), 3.08 – 2.91 (m, 4H, H-5<sub>Lys</sub>), 2.84 (dd,  $J$  = 16.2, 4.2 Hz, 1H, H-2<sub>Asn</sub>), 2.73 (dd,  $J$  = 16.1, 8.1 Hz, 1H, H-2<sub>Asn</sub>), 2.08 (s, 3H), 2.03 (s, 6H), 2.02 (m, 1H), 1.99 (s, 3H), 1.87 (m, 1H), 1.76 (m, 1H), 1.75-1.55 (m, 6H), 1.50-1.35 (m, 4H), 1.36 (d,  $J$  = 6.8 Hz, 3H<sub>Ala</sub>), 1.18 (d,  $J$  = 6.4 Hz, 3H<sub>Fuc</sub>), 1.15 (d,  $J$  = 6.3 Hz, 3H<sub>Thr</sub>), 0.95 (d,  $J$  = 6.8 Hz, 6H<sub>Val</sub>); <sup>13</sup>C NMR (150 MHz, D<sub>2</sub>O):  $\delta$  = 177.2, 175.5, 175.4, 175.2, 173.8, 173.1, 172.8, 161.1, 103.7, 103.7, 101.8, 101.3, 100.4, 100.2(4), 100.2(2), 100.1, 97.8, 81.2, 80.4, 79.3, 79.2, 79.0, 78.9, 77.2, 77.1, 76.1, 76.0, 75.5, 75.4(8), 75.2, 75.1, 74.3, 73.6, 73.3, 72.9, 72.7, 72.6, 71.8, 71.0, 70.3, 70.2, 70.1(7), 69.3, 69.0, 68.68, 68.6(5), 68.1, 68.0(6), 67.6, 67.3, 66.5, 62.5, 62.4, 61.8, 61.4, 60.8, 60.0, 55.7, 55.6, 54.8, 54.4, 54.3(7), 50.8, 50.3, 40.0, 34.3, 31.4, 31.3, 30.9, 27.4, 27.0, 27.0, 23.1, 23.0, 22.9, 22.7, 22.6, 20.1, 19.3, 18.6, 17.5, 16.2. MALDI-TOF MS:  $[M+Na]^+$  C<sub>96</sub>H<sub>165</sub>N<sub>13</sub>O<sub>58</sub>Na, calcd 2450, found 2451; MALDI-TOF MS:  $[M-Lys+Na]^+$  C<sub>90</sub>H<sub>153</sub>N<sub>11</sub>O<sub>57</sub>Na, calcd 2322, found 2324; MALDI-TOF MS:  $[M-LysValAla+Na]^+$  C<sub>82</sub>H<sub>139</sub>N<sub>9</sub>O<sub>55</sub>Na, calcd 2152, found 2153.

**GlcNAc $\beta$ 3Gal $\beta$ 4GlcNAc $\beta$ 2Man $\alpha$ 3(GlcNAc $\beta$ 3Gal $\beta$ 4GlcNAc $\beta$ 2Man $\alpha$ 6)Man $\beta$ 4GlcNAc $\beta$ 4(Fuc $\alpha$ 6)GlcNAc $\beta$ -(KVA)NKT (8b)**

This compound was made by the same method used in the preparation of **53b**. Started from 5.5 mg **8a**, 98% yield. <sup>1</sup>H NMR (600 MHz, D<sub>2</sub>O):  $\delta$  = 5.10 (s, 1H, H-1<sub>Man</sub>), 5.03 (d,  $J$  = 8.9 Hz, 1H, H-1<sub>Gn</sub>), 4.90 (s, 1H, H-1<sub>Man</sub>), 4.85 (s, 1H, H-1<sub>Fuc</sub>), 4.75 (s, 1H, H-1<sub>Man</sub>), 4.66 (d,  $J$  = 7.5 Hz, 4H, 3 H-1<sub>Gn</sub>, H-1<sub>Asn</sub>), 4.56 (d,  $J$  = 6.5 Hz, 2H, H-1<sub>Gn</sub>), 4.45 (d,  $J$  = 7.8 Hz, 1H, H-1<sub>Gal</sub>), 4.44 (d,  $J$  = 7.8 Hz, 1H, H-1<sub>Gal</sub>), 4.38 (m, 1H, H-1<sub>Lys</sub>), 4.28 (q,  $J$  = 7.4 Hz, 1H, H-1<sub>Ala</sub>), 4.23 (s, 1H, H-2<sub>Man</sub>), 4.20 (m, 1H, H-2<sub>Thr</sub>), 4.17 (s, 1H, H-2<sub>Man</sub>), 4.15-4.10 (m, , 2H, H-1<sub>Thr</sub>, H-1<sub>Val</sub>), 4.08 (s, 1H, H-2<sub>Man</sub>), 4.02 – 3.36 (m, 68H), 3.05-2.92 (m, 4H, H-5<sub>Lys</sub>), 2.83 (d,  $J$  = 15.6 Hz, 1H, H-2<sub>Asn</sub>), 2.73 (dd,  $J$  = 15.5, 7.6 Hz, 1H, H-2<sub>Asn</sub>), 2.07 (s, 3H), 2.03 (m, 1 H), 2.02 (s, 12H), 1.99 (s, 3H), 1.89 (m, 1H), 1.83-1.53 (m, 7H), 1.52 – 1.36 (m, 4H), 1.36 (d,  $J$  = 6.8 Hz, 3H<sub>Ala</sub>), 1.18 (d,  $J$  = 5.8 Hz, 3H<sub>Fuc</sub>), 1.15 (d,  $J$  = 5.7 Hz, 3H<sub>Thr</sub>), 0.94 (d,  $J$  = 5.4 Hz, 3H<sub>Val</sub>); <sup>13</sup>C NMR (150 MHz, D<sub>2</sub>O):  $\delta$  = 178.4, 177.2, 175.6, 175.4, 175.3, 175.2, 173.8, 173.0, 172.7, 164.3, 103.6, 102.0, 101.1, 100.2, 100.1, 97.7, 82.7, 81.1, 80.1, 79.0, 78.8, 77.0, 76.8, 76.3, 75.5, 75.4, 75.0, 74.2, 73.5, 73.4(6), 72.7, 72.6, 70.8, 70.6, 70.3, 70.1, 69.0, 68.5, 68.0, 66.3, 62.3, 61.6,

61.3, 61.1, 60.6, 59.9, 56.3, 55.6, 55.4, 54.7, 54.3, 50.6, 50.2, 40.0, 39.9, 37.0, 34.5, 31.7, 31.2, 30.8, 27.8, 27.4, 27.3, 27.2, 23.0, 22.9, 22.8, 22.6, 20.0, 19.1, 18.5, 18.2, 17.3, 17.2; MALDI-TOF MS: [M+H<sup>+</sup>] C112H192N15O68, calcd 2834, found 2835; MALDI-TOF MS: [M-Lys+H<sup>+</sup>] C106H180N13O67, calcd 2706, found 2707; MALDI-TOF MS: [M-LysValAla+H<sup>+</sup>] C98H166N11O65, calcd 2536, found 2537.

#### **Galβ4GlcNAcβ3Galβ4GlcNAcβ2Manα3(Galβ4GlcNAcβ3Galβ4GlcNAcβ2Manα6)Manβ4GlcNAcβ4(Fucα6)GlcNAcβ-(KVA)NKT (8c)**

This compound was made by the same method used in the preparation of **56a**. Started from 6.0 mg **8b**, 82% yield. <sup>1</sup>H NMR (600 MHz, D<sub>2</sub>O): δ = 5.10 (s, 1H, H-1<sub>Man</sub>), 5.03 (d, J = 9.4 Hz, 1H, H-1<sub>Gn</sub>), 4.90 (s, 1H, H-1<sub>Man</sub>), 4.85 (s, 1H, H-1<sub>Fuc</sub>), 4.75 (s, 1H, H-1<sub>Man</sub>), 4.72 – 4.62 (m, 4H, 3 H-1<sub>Gn</sub>, H-1<sub>Asn</sub>), 4.56 (d, J = 7.1 Hz, 2H, H-1<sub>Gn</sub>), 4.51 – 4.41 (m, 4H, H-1<sub>Gal</sub>), 4.38 (m, 1H, H-1<sub>Lys</sub>), 4.28 (q, J = 7.2 Hz, 1H, H-1<sub>Ala</sub>), 4.23 (s, 1H, H-2<sub>Man</sub>), 4.21 (m, 1H, H-1<sub>Thr</sub>), 4.17 (s, 1H, H-2<sub>Man</sub>), 4.16-4.09 (m, 4H), 4.09 (s, 1H, H-2<sub>Man</sub>), 4.03 – 3.36 (m, 78H), 3.05-2.92 (m, 4H, H-5<sub>Lys</sub>), 2.83 (d, J = 15.9 Hz, 1H, H-2<sub>Asn</sub>), 2.73 (dd, J = 16.0, 8.0 Hz, 1H, H-2<sub>Asn</sub>), 2.07 (s, 3H), 2.03 (s, 3H), 2.02 (s, 9H), 2.01 (overlapped, 1H), 1.99 (s, 3H), 1.88 (m, 1H), 1.76 (m, 1H), 1.71 – 1.52 (m, 6H), 1.51-1.38 (m, 4H), 1.36 (d, J = 6.7 Hz, 3H<sub>Ala</sub>), 1.18 (d, J = 6.2 Hz, 3H<sub>Fuc</sub>), 1.15 (d, J = 6.3 Hz, 3H<sub>Thr</sub>), 0.94 (d, J = 6.5 Hz, 3H<sub>Val</sub>); <sup>13</sup>C NMR (150 MHz, D<sub>2</sub>O): δ = 177.2, 175.7, 175.5, 175.3, 173.8, 173.1, 172.8, 103.8, 103.7, 103.6, 103.6, 101.8, 101.3, 100.4, 100.2, 100.1, 97.8, 82.9, 81.2, 80.4, 79.4, 79.3, 79.0, 78.9, 77.2, 77.1, 76.1, 76.0, 75.7, 75.5, 75.4(6), 75.3, 75.2, 74.3, 73.6, 73.5, 73.3, 73.0, 72.8, 72.7, 72.6, 71.8, 71.0, 70.7, 70.3, 70.2, 70.2, 69.3, 69.1, 69.0, 68.7, 68.1, 68.1, 67.6, 67.3, 66.6, 66.5, 62.5, 62.4, 61.8, 61.7, 61.4, 60.7, 60.6, 60.0, 56.0, 55.7, 55.6, 54.9, 54.4, 52.1, 50.8, 50.3, 40.0, 37.1, 34.5, 31.3, 30.9, 27.5, 27.1, 23.1, 23.0, 22.9, 22.7, 22.6, 20.1, 19.3, 18.6, 17.5, 16.2; MALDI-TOF MS: [M+H<sup>+</sup>] C124H212N15O78, calcd 3158, found 3159; MALDI-TOF MS: [M-Lys+H<sup>+</sup>] C118H200N13O77, calcd 3030, found 3031; MALDI-TOF MS: [M-LysValAla+H<sup>+</sup>] C110H186N11O75, calcd 2860, found 2861.

#### **Neu5Acα6Galβ4GlcNAcβ3Galβ4GlcNAcβ2Manα3(Neu5Acα6Galβ4GlcNAcβ3Galβ4GlcNAcβ2Manα6)Manβ4GlcNAcβ4(Fucα6)GlcNAcβ-(KVA)NKT (123)**

Compound **8c** (0.5 mg, 0.158 μmol), CMP-Neu5Ac (0.7 mg, 4.0 equiv.), and hST6Gal-I (1.2 mU) were dissolved in 180 μL buffer (50 mM Tris-HCl, pH 7.5, with 100 mU/mL of calf intestine alkaline phosphatase). After incubation overnight at 37°C, the insoluble precipitates were removed by centrifugation and the supernatant was concentrated and purified by Sephadex<sup>TM</sup> G-25 and lyophilized to give the final product as a white powder (0.5 mg, 85 % yield).

MALDI-TOF MS: permethylated [M-ThrLysVal + Na<sup>+</sup>] C189H333N13O90Na, calcd 4246, found 4250.2.

#### **GlcNAcβ3Galβ4GlcNAcβ3Galβ4GlcNAcβ2Manα3(GlcNAcβ3Galβ4GlcNAcβ3Galβ4GlcNAcβ2Manα6)Manβ4GlcNAcβ4(Fucα6)GlcNAcβ-(KVA)NKT (8d)**

This compound was made by the same method used in the preparation of **53b**. Started from 6.4 mg **8c**, 91% yield. <sup>1</sup>H NMR (600 MHz, D<sub>2</sub>O): δ = 5.10 (s, 1H, H-1<sub>Man</sub>), 5.03 (d, J = 9.3 Hz, 1H, H-1<sub>Gn</sub>), 4.90 (s, 1H, H-1<sub>Man</sub>), 4.85 (s, 1H, H-1<sub>Fuc</sub>), 4.75 (s, 1H, H-1<sub>Man</sub>), 4.67 (m, 6H, 5 H-1<sub>Gn</sub>, H-1<sub>Asn</sub>), 4.56 (d, J = 6.9 Hz, 2H, H-1<sub>Gn</sub>), 4.45 (d, J = 7.6 Hz, 4H, H-1<sub>Gal</sub>), 4.39 (m, 1H, H-1<sub>Lys</sub>), 4.28 (m, 1H, H-1<sub>Ala</sub>), 4.23 (s, 1H, H-2<sub>Man</sub>), 4.20 (m, 1H, H-2<sub>Thr</sub>), 4.17 (s, 1H, H-2<sub>Man</sub>), 4.16 – 4.09 (m, 4H), 4.09 (s, 1H, H-2<sub>Man</sub>), 4.03 – 3.36 (m, 90H), 3.04 – 2.93 (m, 4H, H-5<sub>Lys</sub>), 2.83 (d, J = 16.0 Hz, 1H, H-2<sub>Asn</sub>), 2.73 (dd, J = 16.1, 7.9 Hz, 1H, H-2<sub>Asn</sub>), 2.07 (s, 3H), 2.04 (m, 1H, overlapped), 2.03 (s, 3 H), 2.01 (s, 15H), 1.99 (s, 3H), 1.89 (m, 1H), 1.75 (m, 1H), 1.72 – 1.55 (m, 6H), 1.51 – 1.38 (m, 4H), 1.36 (d, J = 6.7 Hz, 3H<sub>Ala</sub>), 1.18 (d, J = 6.2 Hz, 3H<sub>Fuc</sub>), 1.15 (d, J = 6.3 Hz, 3H<sub>Thr</sub>), 0.94 (d, J = 6.6 Hz, 6H<sub>Val</sub>); <sup>13</sup>C NMR (150 MHz, D<sub>2</sub>O): δ = 177.2, 175.8, 175.7, 175.5, 175.3, 173.8, 173.1, 172.8, 103.8, 103.7, 103.6(7), 103.6, 101.8, 101.3, 100.4, 100.2, 100.1, 97.8, 82.9, 82.8, 81.2, 80.4, 79.3, 79.2(5), 79.0, 78.9, 77.2, 77.1, 76.4, 76.0, 75.7, 75.5, 75.3, 75.2, 74.3, 73.6, 73.0, 72.8, 72.7, 72.6, 71.0, 70.8, 70.7, 70.5, 70.3, 70.2, 69.1, 69.0, 68.7, 68.1, 68.0(6), 67.6, 67.3, 66.5, 62.4, 61.8, 61.4, 61.2, 60.7, 60.6, 60.0, 56.4, 55.9, 55.7, 55.6, 54.8, 54.4, 50.8, 50.3; MALDI-TOF MS: [M+H<sup>+</sup>] C140H238N17O88, calcd 3564, found 3566; MALDI-TOF MS: [M-Lys+H<sup>+</sup>] C134H226N15O87, calcd 3436, found 3442; MALDI-TOF MS: [M-LysValAla+H<sup>+</sup>] C126H212N13O85, calcd 3266, found 3268.

#### **Galβ4GlcNAcβ3Galβ4GlcNAcβ3Galβ4GlcNAcβ2Manα3(Galβ4GlcNAcβ3Galβ4GlcNAcβ3Galβ4GlcNAcβ2Manα6)Manβ4GlcNAcβ4(Fucα6)GlcNAcβ-(KVA)NKT (60a)**

This compound was made by the same method used in the preparation of **56a**. Started from 6.1 mg **8d**, 98% yield. <sup>1</sup>H NMR (600 MHz, D<sub>2</sub>O): δ = 5.10 (s, 1H, H-1<sub>Man</sub>), 5.03 (d, J = 9.2 Hz, 1H, H-1<sub>Gn</sub>), 4.90 (s, 1H, H-1<sub>Man</sub>),



4.85 (s, 1H, H-1<sub>Fuc</sub>), 4.75 (s, 1H, H-1<sub>Man</sub>), 4.68 (d,  $J = 8.2$  Hz, 6H, 5 H-1<sub>Gn</sub>, H-1<sub>Asn</sub>), 4.56 (d,  $J = 6.7$  Hz, 2 H-1<sub>Gn</sub>), 4.51 – 4.41 (m, 6 H-1<sub>Gal</sub>), 4.38 (m, 1H, H-1<sub>Lys</sub>), 4.29 (m, 1H, H-1<sub>Ala</sub>), 4.23 (s, 1H, H-2<sub>Man</sub>), 4.20 (m, 1H, H-2<sub>Thr</sub>), 4.17 (s, 1H, H-2<sub>Man</sub>), 4.16 – 4.10 (m, 6H), 4.09 (s, 1H, H-2<sub>Man</sub>), 4.04 – 3.40 (m, 35H), 3.08-2.94 (m, 4 H-5<sub>Lys</sub>), 2.83 (d,  $J = 15.8$  Hz, 1H, H-2<sub>Asn</sub>), 2.73 (dd,  $J = 16.1, 7.9$  Hz, 1H, H-2<sub>Asn</sub>), 2.07 (s, 3H), 2.04 (m, 1H, overlapped), 2.03 (s, 3H), 2.02 (s, 15H), 1.99 (s, 3H), 1.89 (m, 1H), 1.82 – 1.55 (m, 7H), 1.51 – 1.35 (m, 4H), 1.36 (d,  $J = 6.7$  Hz, 3H<sub>Ala</sub>), 1.18 (d,  $J = 6.2$  Hz, 3H<sub>Fuc</sub>), 1.15 (d,  $J = 6.2$  Hz, 3H<sub>Thr</sub>), 0.95 (d,  $J = 6.3$  Hz, 6H<sub>Val</sub>); <sup>13</sup>C NMR (150 MHz, D<sub>2</sub>O):  $\delta = 177.2, 175.7, 175.5, 175.2, 174.1, 173.8, 173.1, 172.8, 103.7, 103.6, 103.6, 101.8, 101.3, 100.4, 100.3, 100.2, 97.8, 82.9, 81.2, 80.4, 79.3, 79.3, 79.0, 78.9, 77.2, 77.1, 76.1, 76.0, 75.7, 75.5, 75.3, 75.2, 74.3, 73.6, 73.3, 73.0, 72.8, 72.7, 72.6, 72.0, 71.0, 70.7, 70.3, 70.2, 69.3, 69.1, 69.0, 68.7, 68.1, 67.6, 67.3, 66.6, 66.5, 62.5, 62.4, 61.8, 61.7, 61.4, 61.3, 60.7, 60.6, 60.0, 56.0, 55.9, 55.7, 55.6, 54.8, 54.4, 52.1, 50.8, 50.3, 40.0, 37.1, 34.4, 31.3, 31.3, 30.9, 27.4, 27.0, 23.1, 23.0, 22.6, 20.1, 19.3, 18.6, 17.5, 16.2$ ; MALDI-TOF MS: [M+H<sup>+</sup>] C152H258N17O98, calcd 3888, found 3892; MALDI-TOF MS: [M-Lys+H<sup>+</sup>] C146H246N15O97, calcd 3760, found 3764; MALDI-TOF MS: [M-LysValAla+H<sup>+</sup>] C138H232N13O95, calcd 3590, found 3594.

**Neu5Ac $\alpha$ 3Gal $\beta$ 4GlcNAc $\beta$ 3Gal $\beta$ 4GlcNAc $\beta$ 3Gal $\beta$ 4GlcNAc $\beta$ 2Man $\alpha$ 3(Neu5Ac $\alpha$ 3Gal $\beta$ 4GlcNAc $\beta$ 3Gal $\beta$ 4GlcNAc $\beta$ 3Gal $\beta$ 4GlcNAc $\beta$ 2Man $\alpha$ 6)Man $\beta$ 4GlcNAc $\beta$ 4(Fuc $\alpha$ 6)GlcNAc $\beta$ -(KVA)NKT (60)**

Compound **60a** (0.5 mg, 0.13  $\mu$ mol), CMP-Neu5Ac (0.35 mg, 4.0 equiv.), and rST3Gal-III (1 mU) were dissolved in 86  $\mu$ L buffer (50 mM Tris-HCl, pH 7.5, with 100 mU/mL of calf intestine alkaline phosphatase). After incubation overnight at 37°C, the insoluble precipitates were removed by centrifugation and the supernatant was concentrated and purified by Sephadex<sup>TM</sup> G-25 and lyophilized to give the final product as a white powder (0.5 mg, 93 % yield).

MALDI-TOF MS: permethylated [M-ThrLysVal + Na<sup>+</sup>] C229189H403N15O110Na, calcd 5144, found 5149.2.

**Neu5Ac $\alpha$ 6Gal $\beta$ 4GlcNAc $\beta$ 3Gal $\beta$ 4GlcNAc $\beta$ 3Gal $\beta$ 4GlcNAc $\beta$ 2Man $\alpha$ 3(Neu5Ac $\alpha$ 6Gal $\beta$ 4GlcNAc $\beta$ 3Gal $\beta$ 4GlcNAc $\beta$ 3Gal $\beta$ 4GlcNAc $\beta$ 2Man $\alpha$ 6)Man $\beta$ 4GlcNAc $\beta$ 4(Fuc $\alpha$ 6)GlcNAc $\beta$ -(KVA)NKT (124)**

Compound **60a** (0.5 mg, 0.13  $\mu$ mol), CMP-Neu5Ac (0.35 mg, 4.0 equiv.), and hST6Gal-I (1 mU) were dissolved in 130  $\mu$ L buffer (50 mM Tris-HCl, pH 7.5, with 100 mU/mL of calf intestine alkaline phosphatase). After incubation overnight at 37°C, the insoluble precipitates were removed by centrifugation and the supernatant was concentrated and purified by Sephadex<sup>TM</sup> G-25 and lyophilized to give the final product as a white powder (0.5 mg, 93 % yield).

ESI-FT MS: permethylated [M-ThrLysVal + 3xNa<sup>+</sup>] C229H403N15O110Na<sub>3</sub>, calcd 1730, found 1731.9 ( $z = 3$ ).

**GlcNAc $\beta$ 3Gal $\beta$ 4GlcNAc $\beta$ 3Gal $\beta$ 4GlcNAc $\beta$ 3Gal $\beta$ 4GlcNAc $\beta$ 2Man $\alpha$ 3(GlcNAc $\beta$ 3Gal $\beta$ 4GlcNAc $\beta$ 3Gal $\beta$ 4GlcNAc $\beta$ 3Gal $\beta$ 4GlcNAc $\beta$ 2Man $\alpha$ 6)Man $\beta$ 4GlcNAc $\beta$ 4(Fuc $\alpha$ 6)GlcNAc $\beta$ -(KVA)NKT (60b)**

This compound was made by the same method used in the preparation of **53b**. Started from 3.7 mg **60a**, 85% yield. <sup>1</sup>H NMR (600 MHz, D<sub>2</sub>O):  $\delta = 5.10$  (s, 1H, H-1<sub>Man</sub>), 5.03 (d,  $J = 9.6$  Hz, 1H, H-1<sub>Gn</sub>), 4.91 (s, 1H, H-1<sub>Man</sub>), 4.86 (d,  $J = 3.6$  Hz, 1H, H-1<sub>Fuc</sub>), 4.76 (s, 1H, H-1<sub>Man</sub>, overlapped), 4.71 – 4.63 (m, 8H, 7 H-1<sub>Gn</sub>, H-1<sub>Asn</sub>), 4.56 (d,  $J = 6.6$  Hz, 2 H-1<sub>Gn</sub>), 4.51 – 4.41 (m, 6 H-1<sub>Gal</sub>), 4.38 (m, 1H, H-1<sub>Lys</sub>), 4.29 (m, 1H, H-1<sub>Ala</sub>), 4.24 (s, 1H, H-2<sub>Man</sub>), 4.20 (m, 1H, H-2<sub>Thr</sub>), 4.17 (s, 1H, H-2<sub>Man</sub>), 4.16-4.10 (m, 8H), 4.09 (s, 1H, H-2<sub>Man</sub>), 4.04 – 3.33 (m, 110H), 3.08 – 2.90 (m, 4 H-5<sub>Lys</sub>), 2.83 (m, 1H), 2.73 (m, 1H), 2.08 (s, 3H), 2.04 (m, 1H, overlapped), 2.03 (s, 3H), 2.02(7) (s, 3H), 2.02 (s, 9H), 2.01 (s, 9H), 1.99 (s, 3H), 1.89(m, 1H), 1.76 (m, 1H), 1.72 – 1.56 (m, 6H), 1.50 – 1.39 (m, 4H), 1.36 (d,  $J = 6.7$  Hz, 3H<sub>Ala</sub>), 1.18 (d,  $J = 6.3$  Hz, 3H<sub>Fuc</sub>), 1.15 (d,  $J = 6.6$  Hz, 3H<sub>Thr</sub>), 0.95 (d,  $J = 6.8$  Hz, 6H<sub>Val</sub>); <sup>13</sup>C NMR (150 MHz, D<sub>2</sub>O):  $\delta = 177.0, 176.9, 176.6, 176.6(3), 174.9, 103.8, 103.7, 103.7(1), 103.6, 101.7, 101.2, 100.3, 100.2, 100.1, 97.8, 82.5, 82.4, 80.9, 80.1, 78.9, 78.7, 78.6, 76.8, 76.7, 76.1, 75.5, 75.2, 75.0, 74.9, 74.7, 73.9, 73.1, 72.5, 72.3, 72.2, 72.1, 70.5, 70.3, 70.2, 69.9, 69.8, 69.7, 68.6, 68.5, 68.2, 67.6, 67.1, 65.9, 60.7, 59.3, 55.8, 55.1, 54.9, 54.8, 54.0, 53.6, 49.5, 29.8, 21.8, 21.7, 18.8, 18.0, 17.3, 16.2, 14.8, 14.8(3)$ ; MALDI-TOF MS: [M+H<sup>+</sup>] C168H284N19O108, calcd 4294, found 4300; MALDI-TOF MS: [M-Lys+H<sup>+</sup>] C162H272N17O107, calcd 4166, found 4172; MALDI-TOF MS: [M-LysValAla+H<sup>+</sup>] C154H258N15O105, calcd 3996, found 4002.

**Gal $\beta$ 4GlcNAc $\beta$ 3Gal $\beta$ 4GlcNAc $\beta$ 3Gal $\beta$ 4GlcNAc $\beta$ 3Gal $\beta$ 4GlcNAc $\beta$ 2Man $\alpha$ 3(Gal $\beta$ 4GlcNAc $\beta$ 3Gal $\beta$ 4GlcNAc $\beta$ 3Gal $\beta$ 4GlcNAc $\beta$ 3Gal $\beta$ 4GlcNAc $\beta$ 2Man $\alpha$ 6)Man $\beta$ 4GlcNAc $\beta$ 4(Fuc $\alpha$ 6)GlcNAc $\beta$ -(KVA)NKT (61a)**

This compound was made by the same method used in the preparation of **56a**. Started from 3.3 mg **60b**, 86% yield. <sup>1</sup>H NMR (600 MHz, D<sub>2</sub>O):  $\delta = 5.10$  (s, 1H, H-1<sub>Man</sub>), 5.03 (d,  $J = 8.8$  Hz, 1H, H-1<sub>Gn</sub>), 4.91 (s, 1H, H-

$1_{\text{Man}}$ , 4.85 (s, 1H, H-1<sub>Fuc</sub>), 4.75 (s, 1H, H-1<sub>Man</sub>), 4.73 – 4.62 (m, 8H, 7 H-1<sub>Gn</sub>, H-1<sub>Asn</sub>), 4.61 – 4.53 (d,  $J = 7.7$  Hz, 2H-1<sub>Gn</sub>), 4.51 – 4.41 (m, 8 H-1<sub>Gal</sub>), 4.38 (m, 1H, H-1<sub>Lys</sub>), 4.30 (m, 1H, H-1<sub>Ala</sub>), 4.24 (s, 1H, H-2<sub>Man</sub>), 4.21 (m, 1H), 4.17 (s, 1H, H-2<sub>Man</sub>), 4.16 – 4.10 (m, 8H), 4.09 (s, 1H, H-2<sub>Man</sub>), 4.02 – 3.35 (m, 122H), 3.07 – 2.89 (m, 4H, H-5<sub>Lys</sub>), 2.3 (m, 1H, H-2<sub>Asn</sub>), 2.74 (m, 1H, H-2<sub>Asn</sub>), 2.08 (s, 3H), 2.04 (m, 1H, overlapped), 2.03(3) (s, 3H), 2.02(7) (s, 3H), 2.01(6) (s, 18H), 2.00 (s, 3H), 1.90 (m, 1H), 1.76 (m, 1H), 1.72 – 1.61 (m, 6H), 1.49 – 1.40 (m, 4H), 1.36 (d,  $J = 6.6$  Hz, 3H<sub>Ala</sub>), 1.18 (d,  $J = 6.4$  Hz, 3H<sub>Fuc</sub>), 1.15 (d,  $J = 6.5$  Hz, 3H<sub>Thr</sub>), 0.95 (d,  $J = 6.7$  Hz, 6H<sub>Val</sub>);  $^{13}\text{C}$  NMR (151 MHz, D<sub>2</sub>O):  $\delta = 177.2, 175.7, 175.5, 173.8, 103.7, 103.6(5), 103.5(6), 101.7, 101.3, 100.3(5), 100.2, 100.1, 97.8, 82.9, 81.2, 80.4, 79.3, 78.9, 77.2, 77.1, 76.1, 76.0, 75.7, 75.5, 75.4(6), 75.3, 75.2, 74.3, 73.6, 73.3, 73.0, 72.8, 72.7, 72.6, 71.7, 71.0, 70.7, 70.3, 70.2, 69.3, 69.1, 69.0, 68.7, 68.1, 67.6, 67.3, 66.5, 61.4, 59.9, 56.0, 55.9, 55.7, 55.6, 54.8, 54.4, 52.1, 50.7, 50.3, 40.0, 34.5, 32.6, 31.3, 30.9, 27.4, 27.1, 23.1, 23.0, 22.6, 20.1, 19.3, 18.6, 17.5, 16.2$ ; MALDI-TOF MS  $m/z$  calcd for C<sub>180</sub>H<sub>303</sub>N<sub>19</sub>O<sub>118</sub> [M+Na<sup>+</sup>] 4640, found 4644; MALDI-TOF MS: [M-Lys+Na<sup>+</sup>] C<sub>174</sub>H<sub>292</sub>N<sub>17</sub>O<sub>117</sub>Na, calcd 4513, found 4515; MALDI-TOF MS: [M-LysValAla+Na<sup>+</sup>] C<sub>166</sub>H<sub>277</sub>N<sub>15</sub>O<sub>115</sub>Na, calcd 4342, found 4346.

**Neu5Ac $\alpha$ 3Gal $\beta$ 4GlcNAc $\beta$ 3Gal $\beta$ 4GlcNAc $\beta$ 3Gal $\beta$ 4GlcNAc $\beta$ 3Gal $\beta$ 4GlcNAc $\beta$ 2Man $\alpha$ 3(Neu5Ac $\alpha$ 3Gal $\beta$ 4GlcNAc $\beta$ 3Gal $\beta$ 4GlcNAc $\beta$ 3Gal $\beta$ 4GlcNAc $\beta$ 3Gal $\beta$ 4GlcNAc $\beta$ 2Man $\alpha$ 6)Man $\beta$ 4GlcNAc $\beta$ 4(Fuc $\alpha$ 6)GlcNAc $\beta$ -(KVA)NKT (61)**

Compound **61a** (0.5 mg, 0.108  $\mu\text{mol}$ ), CMP-Neu5Ac (0.43 mg, 6.0 equiv.), and rST3Gal-III (3 mU) were dissolved in 72  $\mu\text{L}$  buffer (50 mM Tris-HCl, pH 7.5, with 100 mU/mL of calf intestine alkaline phosphatase). After incubation overnight at 37°C, the insoluble precipitates were removed by centrifugation and the supernatant was concentrated and purified by Sephadex<sup>TM</sup> G-25 and lyophilized to give the final product as a white powder (0.5 mg, 89 % yield).

MALDI-TOF MS: permethylated [M+Na<sup>+</sup>] C<sub>269</sub>H<sub>473</sub>N<sub>17</sub>O<sub>130</sub>Na, calcd 6042, found 6047.9.

**Neu5Ac $\alpha$ 6Gal $\beta$ 4GlcNAc $\beta$ 3Gal $\beta$ 4GlcNAc $\beta$ 3Gal $\beta$ 4GlcNAc $\beta$ 3Gal $\beta$ 4GlcNAc $\beta$ 2Man $\alpha$ 3(Neu5Ac $\alpha$ 6Gal $\beta$ 4GlcNAc $\beta$ 3Gal $\beta$ 4GlcNAc $\beta$ 3Gal $\beta$ 4GlcNAc $\beta$ 3Gal $\beta$ 4GlcNAc $\beta$ 2Man $\alpha$ 6)Man $\beta$ 4GlcNAc $\beta$ 4(Fuc $\alpha$ 6)GlcNAc $\beta$ -(KVA)NKT (125)**

Compound **61a** (0.5 mg, 0.108  $\mu\text{mol}$ ), CMP-Neu5Ac (0.3 mg, 4.0 equiv.), and hST6Gal-I (1 mU) were dissolved in 72  $\mu\text{L}$  buffer (50 mM Tris-HCl, pH 7.5, with 100 mU/mL of calf intestine alkaline phosphatase). After incubation overnight at 37°C, the insoluble precipitates were removed by centrifugation and the supernatant was concentrated and purified by Sephadex<sup>TM</sup> G-25 and lyophilized to give the final product as a white powder (0.5 mg, 93 % yield); MALDI-TOF MS: [M+K<sup>+</sup>] C<sub>202</sub>H<sub>337</sub>N<sub>21</sub>O<sub>134</sub>K, calcd for 5238, found 5242.

**Gal $\beta$ 4GlcNAc $\beta$ 2(Gal $\beta$ 4GlcNAc $\beta$ 6)Man $\alpha$ 6(Gal $\beta$ 4GlcNAc $\beta$ 2Man $\alpha$ 3)Man $\beta$ 4GlcNAc $\beta$ 4GlcNAc $\beta$ -(KVA)NKT (9a)**

This compound was made by the same method used in the preparation of **56a**. Started from 7.6 mg **62c**, 87% yield; MALDI-TOF MS: [M+Na<sup>+</sup>] C<sub>104</sub>H<sub>179</sub>N<sub>14</sub>O<sub>64</sub>Na, calcd 2670, found 2670.

**GlcNAc $\beta$ 3Gal $\beta$ 4GlcNAc $\beta$ 2(GlcNAc $\beta$ 3Gal $\beta$ 4GlcNAc $\beta$ 6)Man $\alpha$ 6(GlcNAc $\beta$ 3Gal $\beta$ 4GlcNAc $\beta$ 2Man $\alpha$ 3)Man $\beta$ 4GlcNAc $\beta$ 4GlcNAc $\beta$ -(KVA)NKT (9b)**

This compound was made by the same method used in the preparation of **53b**. Started from 6 mg **9a**, 80% yield;  $^1\text{H}$  NMR (600 MHz, D<sub>2</sub>O):  $\delta = 5.11$  (s, 1H, H-1<sub>Man</sub>), 5.03 (d,  $J = 9.5$  Hz, 1H, H-1<sub>Gn</sub>), 4.85 (s, 1H, H-1<sub>Man</sub>), 4.75 (s, 1H, H-1<sub>Man</sub>), 4.68 (m, 1H, H-1<sub>Asn</sub>), 4.70-4.63 (m, 3H-1<sub>Gn</sub>), 4.62-4.55 (m, 3H, H-1<sub>Gn</sub>), 4.53 (d,  $J = 8.2$  Hz, 1H), 4.45 (m, 3H, H-1<sub>Gal</sub>), 4.39 (m, 1H, H-1<sub>Lys</sub>), 4.30 (q,  $J = 7.2$  Hz, 1H, H-1<sub>Ala</sub>), 4.24 (s, 1H, H-2<sub>Man</sub>), 4.22 – 4.16 (m, 2H), 4.18 (s, 1H, H-2<sub>Man</sub>), 4.16 – 4.09 (m, 4H), 4.07 (s, 1H, H-2<sub>Man</sub>), 4.03 – 3.27 (m, 79H), 3.07 – 2.91 (m, 4H, H-5<sub>Lys</sub>), 2.85 (dd,  $J = 4.8, 16.0$  Hz, 1H, H-2<sub>Asn</sub>), 2.73 (dd,  $J = 6.5, 16.0$  Hz, 1H, H-2<sub>Asn</sub>), 2.06 (s, 3H), 2.04 (s, 3H), 2.03 (m, 1H), 2.02 (s, 15H), 1.99 (s, 3H), 1.89 (m, 1H), 1.76 (m, 1H), 1.72-1.60 (m, 6H), 1.50-1.35 (m, 4H), 1.37 (d,  $J = 7.1$  Hz, 3H<sub>Ala</sub>), 1.15 (d,  $J = 6.4$  Hz, 3H<sub>Thr</sub>), 0.95 (d,  $J = 6.6$  Hz, 6H<sub>Val</sub>);  $^{13}\text{C}$  NMR (150 MHz, D<sub>2</sub>O):  $\delta = 175.8, 175.5, 174.9, 103.76, 103.7, 102.4, 102.1, 101.1, 100.4, 100.3, 98.0, 82.8, 81.0, 80.0, 79.4, 79.3, 79.0, 77.4, 77.2, 77.0, 76.6, 76.4, 75.7, 75.5, 75.2, 74.3, 74.1, 73.6, 73.0, 72.8, 72.7, 72.3, 71.1, 71.0, 70.8, 70.5, 70.2, 69.1, 68.7, 68.3, 68.1, 66.4, 65.9, 62.5, 61.7, 61.2, 60.9, 60.8, 60.6, 59.9, 56.4, 55.8, 55.6, 54.4, 50.8, 50.3, 40.0, 31.3, 30.9, 27.0, 23.3, 23.1, 23.0, 22.6, 20.1$ ; MALDI-TOF MS: [M+H<sup>+</sup>] C<sub>128</sub>H<sub>219</sub>N<sub>17</sub>O<sub>79</sub>, calcd 3257, found 3257.

**Gal $\beta$ 4GlcNAc $\beta$ 3Gal $\beta$ 4GlcNAc $\beta$ 2(Gal $\beta$ 4GlcNAc $\beta$ 3Gal $\beta$ 4GlcNAc $\beta$ 6)Man $\alpha$ 6(Gal $\beta$ 4GlcNAc $\beta$ 3Gal $\beta$ 4GlcNAc $\beta$ 2Man $\alpha$ 3)Man $\beta$ 4GlcNAc $\beta$ 4GlcNAc $\beta$ -(KVA)NKT (62a)**

This compound was made by the same method used in the preparation of **56a**. Started from 5.9 mg **9b**, 97% yield;  $^1\text{H NMR}$  (600 MHz,  $\text{D}_2\text{O}$ ):  $\delta$  = 5.11 (s, 1H, H-1<sub>Man</sub>), 5.03 (d,  $J$  = 9.0 Hz, 1H, H-1<sub>Gn</sub>), 4.85 (s, 1H, H-1<sub>Man</sub>), 4.75 (s, 1H, H-1<sub>Man</sub>, overlapped with H<sub>2</sub>O peak), 4.68 (d,  $J$  = 7.7 Hz, 3H, H-1<sub>Gn</sub>), 4.67 (m, 1H, H-1<sub>Asn</sub>), 4.63 – 4.54 (m, 3H-1<sub>Gn</sub>), 4.52 (d,  $J$  = 7.5 Hz, 1H-1<sub>Gn</sub>), 4.50 – 4.41 (m, 6H-1<sub>Gal</sub>), 4.39 (m, 1H, H-1<sub>Lys</sub>), 4.29 (m, 1H, H-1<sub>Ala</sub>), 4.23 (s, 1H, H-2<sub>Man</sub>), 4.22 – 4.19 (m, 1H, H-2<sub>Thr</sub>), 4.18 (s, 1H, H-2<sub>Man</sub>), 4.14 (s, 3H, H-4<sub>Gal</sub>), 4.07 (s, 1H, H-2<sub>Man</sub>), 4.02 – 3.29 (m, 97H), 2.06 (s, 3H), 2.04 (s, 3H), 2.02 (s, 15H), 1.99 (s, 3H), 1.36 (d,  $J$  = 6.3 Hz, 3H<sub>Ala</sub>), 1.15 (d,  $J$  = 6.0 Hz, 3H<sub>Thr</sub>), 0.95 (d,  $J$  = 6.1 Hz, 6H<sub>Val</sub>); MALDI-TOF MS:  $[\text{M}+\text{Na}^+]$  C<sub>146</sub>H<sub>248</sub>N<sub>17</sub>O<sub>94</sub>Na, calcd 3765, found 3768.

**Neu5Ac $\alpha$ 3Gal $\beta$ 4GlcNAc $\beta$ 3Gal $\beta$ 4GlcNAc $\beta$ 2(Neu5Ac $\alpha$ 3Gal $\beta$ 4GlcNAc $\beta$ 3Gal $\beta$ 4GlcNAc $\beta$ 6)Man $\alpha$ 6(Neu5Ac $\alpha$ 3Gal $\beta$ 4GlcNAc $\beta$ 3Gal $\beta$ 4GlcNAc $\beta$ 2Man $\alpha$ 3)Man $\beta$ 4GlcNAc $\beta$ 4GlcNAc $\beta$ -(KVA)NKT (62)**

Compound **62a** (0.5 mg, 0.134  $\mu\text{mol}$ ), CMP-Neu5Ac (0.53 mg, 6.0 equiv.), and rST3Gal-III (3 mU) were dissolved in 134  $\mu\text{L}$  buffer (50 mM Tris-HCl, pH 7.5, with 100 mU/mL of calf intestine alkaline phosphatase). After incubation overnight at 37°C, the insoluble precipitates were removed by centrifugation and the supernatant was concentrated and purified by Sephadex<sup>TM</sup> G-25 and lyophilized to give the final product as a white powder (0.55 mg, 89 % yield); ESI-FT MS: permethylated  $[\text{M}-\text{ThrLysVal}+\text{K}^++\text{Na}^++\text{H}^+]$  C<sub>237</sub>H<sub>417</sub>N<sub>16</sub>O<sub>114</sub>NaK, calcd 1790.3, found 1791.9 ( $z$  = 3).

**Neu5Ac $\alpha$ 6Gal $\beta$ 4GlcNAc $\beta$ 3Gal $\beta$ 4GlcNAc $\beta$ 2(Neu5Ac $\alpha$ 6Gal $\beta$ 4GlcNAc $\beta$ 3Gal $\beta$ 4GlcNAc $\beta$ 6)Man $\alpha$ 6(Neu5Ac $\alpha$ 6Gal $\beta$ 4GlcNAc $\beta$ 3Gal $\beta$ 4GlcNAc $\beta$ 2Man $\alpha$ 3)Man $\beta$ 4GlcNAc $\beta$ 4GlcNAc $\beta$ -(KVA)NKT (126)**

Compound **62a** (0.5 mg, 0.134  $\mu\text{mol}$ ), CMP-Neu5Ac (0.53 mg, 6.0 equiv.), and hST6Gal-I (1 mU) were dissolved in 134  $\mu\text{L}$  buffer (50 mM Tris-HCl, pH 7.5, with 100 mU/mL of calf intestine alkaline phosphatase). After incubation overnight at 37°C, the insoluble precipitates were removed by centrifugation and the supernatant was concentrated and purified by Sephadex<sup>TM</sup> G-25 and lyophilized to give the final product as a white powder (0.5 mg, 89 % yield); ESI-FT MS: permethylated  $[\text{M}-\text{ThrLysVal}+\text{K}^++2\text{xNa}^+]$  C<sub>237</sub>H<sub>416</sub>N<sub>16</sub>O<sub>114</sub>Na<sub>2</sub>K, calcd 1797.6, found 1799.3 ( $z$  = 3).

**GlcNAc $\beta$ 3Gal $\beta$ 4GlcNAc $\beta$ 3Gal $\beta$ 4GlcNAc $\beta$ 2(GlcNAc $\beta$ 3Gal $\beta$ 4GlcNAc $\beta$ 3Gal $\beta$ 4GlcNAc $\beta$ 6)Man $\alpha$ 6(GlcNAc $\beta$ 3Gal $\beta$ 4GlcNAc $\beta$ 3Gal $\beta$ 4GlcNAc $\beta$ 2Man $\alpha$ 3)Man $\beta$ 4GlcNAc $\beta$ 4GlcNAc $\beta$ -(KVA)NKT (62b)**

This compound was made by the same method used in the preparation of **53b**. Started from 4.6 mg **62a**, 93% yield;  $^1\text{H NMR}$  (600 MHz,  $\text{D}_2\text{O}$ ):  $\delta$  = 5.11 (s, 1H, H-1<sub>Man</sub>), 5.03 (d,  $J$  = 8.3 Hz, 1H, H-1<sub>Gn</sub>), 4.85 (s, 1H, H-1<sub>Man</sub>), 4.75 (s, 1H, H-1<sub>Man</sub>, overlapped with H<sub>2</sub>O peak), 4.71-4.63 (m, 6H-1<sub>Gn</sub>, H-1<sub>Asn</sub>), 4.63-4.54 (m, 3H-1<sub>Gn</sub>), 4.52 (d,  $J$  = 7.4 Hz, 1H, H-1<sub>Gn</sub>), 4.48-4.41 (m, 6H-1<sub>Gal</sub>), 4.41-4.36 (m, 1H, H-1<sub>Lys</sub>), 4.32-4.26 (m, 1H, H-1<sub>Ala</sub>), 4.23 (s, 1H, H-2<sub>Man</sub>), 4.22-4.18 (m, 1H, H-2<sub>Thr</sub>), 4.18 (s, 1H, H-2<sub>Man</sub>), 4.17-4.07 (m, 6H-4<sub>Gal</sub>, H-1<sub>Thr</sub>, H-1<sub>Val</sub>), 4.07 (s, 1H, H-2<sub>Man</sub>), 4.04 – 3.29 (m, 112H), 2.06 (s, 3H), 2.03 (s, 3H), 2.02 (s, 24H), 1.99 (s, 3H), 1.36 (d,  $J$  = 6.7 Hz, 3H<sub>Ala</sub>), 1.15 (d,  $J$  = 6.1 Hz, 3H<sub>Thr</sub>), 0.95 (d,  $J$  = 6.4 Hz, 6H<sub>Val</sub>); MALDI-TOF MS:  $[\text{M}+\text{H}^+]$  C<sub>170</sub>H<sub>287</sub>N<sub>20</sub>O<sub>109</sub>, calcd 4351, found 4355; MALDI-TOF MS:  $[\text{M}-\text{LysValAla}+\text{H}^+]$  C<sub>156</sub>H<sub>261</sub>N<sub>16</sub>O<sub>106</sub>, calcd 4053, found 4056.

**Gal $\beta$ 4GlcNAc $\beta$ 3Gal $\beta$ 4GlcNAc $\beta$ 3Gal $\beta$ 4GlcNAc $\beta$ 2(Gal $\beta$ 4GlcNAc $\beta$ 3Gal $\beta$ 4GlcNAc $\beta$ 3Gal $\beta$ 4GlcNAc $\beta$ 6)Man $\alpha$ 6(Gal $\beta$ 4GlcNAc $\beta$ 3Gal $\beta$ 4GlcNAc $\beta$ 3Gal $\beta$ 4GlcNAc $\beta$ 2Man $\alpha$ 3)Man $\beta$ 4GlcNAc $\beta$ 4GlcNAc $\beta$ -(KVA)NKT (63a)**

This compound was made by the same method used in the preparation of **56a**. Started from 4 mg **62b**, 91% yield;  $^1\text{H NMR}$  (600 MHz,  $\text{D}_2\text{O}$ ):  $\delta$  = 5.11 (s, 1H, H-1<sub>Man</sub>), 5.03 (d,  $J$  = 8.0 Hz, 1H, H-1<sub>Gn</sub>), 4.85 (s, 1H, H-1<sub>Man</sub>), 4.75 (s, 1H, H-1<sub>Man</sub>, overlapped with H<sub>2</sub>O peak), 4.73-4.63 (m, 6H-1<sub>Gn</sub>, H-1<sub>Asn</sub>), 4.63 – 4.55 (m, 3H-1<sub>Gn</sub>), 4.52 (d,  $J$  = 7.4 Hz, 1H, H-1<sub>Gn</sub>), 4.49-4.41 (m, 9H-1<sub>Gal</sub>), 4.41-4.36 (m, 1H, H-1<sub>Lys</sub>), 4.32-4.26 (m, 1H, H-1<sub>Ala</sub>), 4.23 (s, 1H, H-2<sub>Man</sub>), 4.22-4.19 (m, 1H, H-2<sub>Thr</sub>), 4.18 (s, 1H, H-2<sub>Man</sub>), 4.16-4.08 (m, 6H-4<sub>Gal</sub>, H-1<sub>Thr</sub>, H-1<sub>Val</sub>), 4.07 (m, 1H, H-2<sub>Man</sub>), 4.02-3.33 (m, 130H), 2.06 (s, 3H), 2.03 (s, 3H), 2.02 (s, 24H), 1.99 (s, 3H), 1.36 (d,  $J$  = 6.7 Hz, 3H<sub>Ala</sub>), 1.15 (d,  $J$  = 6.1 Hz, 3H<sub>Thr</sub>), 0.95 (d,  $J$  = 6.4 Hz, 6H<sub>Val</sub>); MALDI-TOF MS:  $[\text{M}+\text{H}^+]$  C<sub>188</sub>H<sub>317</sub>N<sub>20</sub>O<sub>124</sub>, calcd 4837, found 4840; MALDI-TOF MS:  $[\text{M}-\text{LysValAla}+\text{H}^+]$  C<sub>174</sub>H<sub>290</sub>N<sub>16</sub>O<sub>121</sub>, calcd 4538, found 4541.

**Neu5Ac $\alpha$ 3Gal $\beta$ 4GlcNAc $\beta$ 3Gal $\beta$ 4GlcNAc $\beta$ 3Gal $\beta$ 4GlcNAc $\beta$ 2(Neu5Ac $\alpha$ 3Gal $\beta$ 4GlcNAc $\beta$ 3Gal $\beta$ 4GlcNAc $\beta$ 3Gal $\beta$ 4GlcNAc $\beta$ 2Man $\alpha$ 3)Man $\beta$ 4GlcNAc $\beta$ 4GlcNAc $\beta$ -(KVA)NKT (63)**

Compound **63a** (0.5 mg, 0.103  $\mu$ mol), CMP-Neu5Ac (0.4 mg, 6.0 equiv.), and rST3Gal-III (1 mU) were dissolved in 100  $\mu$ L buffer (50 mM Tris-HCl, pH 7.5, with 100 mU/mL of calf intestine alkaline phosphatase). After incubation overnight at 37°C, the insoluble precipitates were removed by centrifugation and the supernatant was concentrated and purified by Sephadex<sup>TM</sup> G-25 and lyophilized to give the final product as a white powder (0.5 mg, 85 % yield); MALDI-TOF MS: permethylated [M-ThrLysVal+Na<sup>+</sup>] C297H521N19O144Na, calcd 6678, found 6685.9.

**Neu5Ac $\alpha$ 6Gal $\beta$ 4GlcNAc $\beta$ 3Gal $\beta$ 4GlcNAc $\beta$ 3Gal $\beta$ 4GlcNAc $\beta$ 2(Neu5Ac $\alpha$ 6Gal $\beta$ 4GlcNAc $\beta$ 3Gal $\beta$ 4GlcNAc $\beta$ 3Gal $\beta$ 4GlcNAc $\beta$ 6)Man $\alpha$ 6(Neu5Ac $\alpha$ 6Gal $\beta$ 4GlcNAc $\beta$ 3Gal $\beta$ 4GlcNAc $\beta$ 3Gal $\beta$ 4GlcNAc $\beta$ 2Man $\alpha$ 3)Man $\beta$ 4GlcNAc $\beta$ 4GlcNAc $\beta$ -(KVA)NKT (127)**

Compound **63a** (0.5 mg, 0.103  $\mu$ mol), CMP-Neu5Ac (0.4 mg, 6.0 equiv.), and hST6Gal-I (1 mU) were dissolved in 103  $\mu$ L buffer (50 mM Tris-HCl, pH 7.5, with 100 mU/mL of calf intestine alkaline phosphatase). After incubation overnight at 37°C, the insoluble precipitates were removed by centrifugation and the supernatant was concentrated and purified by Sephadex<sup>TM</sup> G-25 and lyophilized to give the final product as a white powder (0.5 mg, 85 % yield); ESI-FT MS: permethylated [M-ThrLysVal+4xNa<sup>+</sup>] C297H521N19O144Na<sub>4</sub>, calcd 1686.8, found 1686.9 (z = 4).

**GlcNAc $\beta$ 3Gal $\beta$ 4GlcNAc $\beta$ 3Gal $\beta$ 4GlcNAc $\beta$ 3Gal $\beta$ 4GlcNAc $\beta$ 2(GlcNAc $\beta$ 3Gal $\beta$ 4GlcNAc $\beta$ 3Gal $\beta$ 4GlcNAc $\beta$ 3Gal $\beta$ 4GlcNAc $\beta$ 6)Man $\alpha$ 6(GlcNAc $\beta$ 3Gal $\beta$ 4GlcNAc $\beta$ 3Gal $\beta$ 4GlcNAc $\beta$ 3Gal $\beta$ 4GlcNAc $\beta$ 2Man $\alpha$ 3)Man $\beta$ 4GlcNAc $\beta$ 4GlcNAc $\beta$ -(KVA)NKT (63b)**

This compound was made by the same method used in the preparation of **53b**. Started from 2 mg **63a**, 86% yield; <sup>1</sup>H NMR (600 MHz, D<sub>2</sub>O):  $\delta$  = 5.11 (s, 1H, H-1<sub>Man</sub>), 5.03 (d, J = 8.6 Hz, 1H, H-1<sub>Gn</sub>), 4.85 (s, 1H, H-1<sub>Man</sub>), 4.75 (s, 1H, H-1<sub>Man</sub>, overlapped with H<sub>2</sub>O peak), 4.73-4.63 (m, 9H-1<sub>Gn</sub>, H-1<sub>Asn</sub>), 4.63 – 4.55 (m, 3H-1<sub>Gn</sub>), 4.52 (d, J = 7.4 Hz, 1H, H-1<sub>Gn</sub>), 4.50-4.42 (m, 9H-1<sub>Gal</sub>), 4.24 (s, 1H, H-2<sub>Man</sub>), 4.23-4.20 (m, 1H, H-2<sub>Thr</sub>), 4.18 (s, 1H, H-2<sub>Man</sub>), 4.17-4.11 (m, 9H-4<sub>Gal</sub>), 4.07 (s, 1H, H-2<sub>Man</sub>), 4.01 – 3.34 (m, 145H), 2.06 (s, 3H), 2.04 (s, 3H), 2.02 (s, 33H), 1.99 (s, 3H), 1.15 (d, J = 6.1 Hz, 3H<sub>Thr</sub>), 0.95 (d, J = 6.4 Hz, 6H<sub>Val</sub>); MALDI-TOF MS: [M+H<sup>+</sup>] C212H356N23O139, calcd 5446, found 5448; MALDI-TOF MS: [M-LysValAla+H<sup>+</sup>] C198H330N19O136, calcd 5148, found 5150.

**Gal $\beta$ 4GlcNAc $\beta$ 3Gal $\beta$ 4GlcNAc $\beta$ 3Gal $\beta$ 4GlcNAc $\beta$ 3Gal $\beta$ 4GlcNAc $\beta$ 2(Gal $\beta$ 4GlcNAc $\beta$ 3Gal $\beta$ 4GlcNAc $\beta$ 3Gal $\beta$ 4GlcNAc $\beta$ 3Gal $\beta$ 4GlcNAc $\beta$ 6)Man $\alpha$ 6(Gal $\beta$ 4GlcNAc $\beta$ 3Gal $\beta$ 4GlcNAc $\beta$ 3Gal $\beta$ 4GlcNAc $\beta$ 3Gal $\beta$ 4GlcNAc $\beta$ 2Man $\alpha$ 3)Man $\beta$ 4GlcNAc $\beta$ 4GlcNAc $\beta$ -(KVA)NKT (64a)**

This compound was made by the same method used in the preparation of **56a**. Started from 1.6 mg **63b**, 85% yield; <sup>1</sup>H NMR (600 MHz, D<sub>2</sub>O):  $\delta$  = 5.11 (s, 1H, H-1<sub>Man</sub>), 5.03 (d, J = 8.6 Hz, 1H, H-1<sub>Gn</sub>), 4.85 (s, 1H, H-1<sub>Man</sub>), 4.75 (s, 1H, H-1<sub>Man</sub>, overlapped with H<sub>2</sub>O peak), 4.73-4.63 (m, 9H-1<sub>Gn</sub>, H-1<sub>Asn</sub>), 4.63 – 4.55 (m, 3H-1<sub>Gn</sub>), 4.52 (d, J = 7.4 Hz, 1H, H-1<sub>Gn</sub>), 4.50-4.42 (m, 12H-1<sub>Gal</sub>), 4.24 (s, 1H, H-2<sub>Man</sub>), 4.23-4.20 (m, 1H, H-2<sub>Thr</sub>), 4.18 (s, 1H, H-2<sub>Man</sub>), 4.17-4.11 (m, 9H-4<sub>Gal</sub>), 4.07 (s, 1H, H-2<sub>Man</sub>), 4.03 – 3.33 (m, 163H), 2.06 (s, 3H), 2.04 (s, 3H), 2.02 (s, 33H), 1.99 (s, 3H), 1.15 (d, J = 6.1 Hz, 3H<sub>Thr</sub>), 0.95 (d, J = 6.4 Hz, 6H<sub>Val</sub>); MALDI-TOF MS: [M+H<sup>+</sup>] C230H386N23O154, calcd 5932, found 5937; MALDI-TOF MS: [M-LysValAla+H<sup>+</sup>] C216H360N19O151, calcd 5634, found 5639.

**Neu5Ac $\alpha$ 3Gal $\beta$ 4GlcNAc $\beta$ 3Gal $\beta$ 4GlcNAc $\beta$ 3Gal $\beta$ 4GlcNAc $\beta$ 3Gal $\beta$ 4GlcNAc $\beta$ 2(Neu5Ac $\alpha$ 3Gal $\beta$ 4GlcNAc $\beta$ 3Gal $\beta$ 4GlcNAc $\beta$ 3Gal $\beta$ 4GlcNAc $\beta$ 3Gal $\beta$ 4GlcNAc $\beta$ 6)Man $\alpha$ 6(Neu5Ac $\alpha$ 3Gal $\beta$ 4GlcNAc $\beta$ 3Gal $\beta$ 4GlcNAc $\beta$ 3Gal $\beta$ 4GlcNAc $\beta$ 3Gal $\beta$ 4GlcNAc $\beta$ 2Man $\alpha$ 3)Man $\beta$ 4GlcNAc $\beta$ 4GlcNAc $\beta$ -(KVA)NKT (64)**

Compound **64a** (0.5 mg, 0.08  $\mu$ mol), CMP-Neu5Ac (0.4 mg, 6.0 equiv.), and rST3Gal-III (1 mU) were dissolved in 84  $\mu$ L buffer (50 mM Tris-HCl, pH 7.5, with 100 mU/mL of calf intestine alkaline phosphatase). After incubation overnight at 37°C, the insoluble precipitates were removed by centrifugation and the supernatant was concentrated and purified by Sephadex<sup>TM</sup> G-25 and lyophilized to give the final product as a white powder (0.5 mg, 88 % yield); MALDI-TOF MS: permethylated [M-LysValAlaAsnLysThr+Na<sup>+</sup>] C339H593N17O170Na, Calcd 7642, found 7649.4.

**Neu5Ac $\alpha$ 6Gal $\beta$ 4GlcNAc $\beta$ 3Gal $\beta$ 4GlcNAc $\beta$ 3Gal $\beta$ 4GlcNAc $\beta$ 3Gal $\beta$ 4GlcNAc $\beta$ 2(Neu5Ac $\alpha$ 6Gal $\beta$ 4GlcNAc $\beta$ 3Gal $\beta$ 4GlcNAc $\beta$ 3Gal $\beta$ 4GlcNAc $\beta$ 3Gal $\beta$ 4GlcNAc $\beta$ 6)Man $\alpha$ 6(Neu5Ac $\alpha$ 6Gal $\beta$ 4GlcNAc $\beta$ 3Gal $\beta$ 4GlcNAc $\beta$ 3Gal $\beta$ 4GlcNAc $\beta$ 3Gal $\beta$ 4GlcNAc $\beta$ 2Man $\alpha$ 3)Man $\beta$ 4GlcNAc $\beta$ 4GlcNAc $\beta$ -(KVA)NKT (128)**



Compound **64a** (0.5 mg, 0.08  $\mu$ mol), CMP-Neu5Ac (0.4 mg, 6.0 equiv.), and hST6Gal-I (1 mU) were dissolved in 84  $\mu$ L buffer (50 mM Tris-HCl, pH 7.5, with 100 mU/mL of calf intestine alkaline phosphatase). After incubation overnight at 37°C, the insoluble precipitates were removed by centrifugation and the supernatant was concentrated and purified by Sephadex<sup>TM</sup> G-25 and lyophilized to give the final product as a white powder (0.5 mg, 88 % yield); MALDI-TOF MS: permethylated [M-LysValAlaAsnLysThr+Na<sup>+</sup>] C339H593N17O170Na, Calcd 7642, found 7648.5.

#### **Gal $\beta$ 4GlcNAc $\beta$ 2(Gal $\beta$ 4GlcNAc $\beta$ 6)Man $\alpha$ 6(Gal $\beta$ 4GlcNAc $\beta$ 2Man $\alpha$ 3)Man $\beta$ 4GlcNAc $\beta$ 4(Fuc $\alpha$ 6)GlcNAc $\beta$ -(KVA)NKT (10a)**

This compound was made by the same method used in the preparation of **56a**. Started from 7.6 mg **65c**, 91% yield; <sup>1</sup>H NMR (600 MHz, D<sub>2</sub>O):  $\delta$  = 5.11 (s, 1H, H-1<sub>Man</sub>), 5.03 (d,  $J$  = 9.3 Hz, 1H, H-1<sub>Gn</sub>), 4.86 (d,  $J$  = 3.6 Hz, 1H, overlapped), 4.85 (s, 1H, H-1<sub>Man</sub>), 4.75 (s, 1H, H-1<sub>Man</sub>, overlapped), 4.68 (m, 1H, H-1<sub>Asn</sub>), 4.66 (d,  $J$  = 7.2 Hz, 1H, H-1<sub>Gn</sub>), 4.61 – 4.54 (m, 2H, H-1<sub>Gn</sub>), 4.53 (d,  $J$  = 7.5 Hz, 1H, H-1<sub>Gn</sub>), 4.48 – 4.42 (m, 3H, H-1<sub>Gal</sub>), 4.38 (m, 1H, H-1<sub>Lys</sub>), 4.28 (m, 1H, H-1<sub>Ala</sub>), 4.23 (s, 1H, H-2<sub>Man</sub>), 4.20 (m, 1H, H-2<sub>Thr</sub>), 4.18 (s, 1H, H-2<sub>Man</sub>), 4.15–4.08 (m, 2H, H-1<sub>Thr</sub>, H-1<sub>Val</sub>), 4.07 (s, 1H, H-2<sub>Man</sub>), 4.03 – 3.33 (m, 68H), 3.04 – 2.89 (m, 4H, H-5<sub>Lys</sub>), 2.83 (m, 1H, H-2<sub>Asn</sub>), 2.73 (m, 1H, H-2<sub>Asn</sub>), 2.07 (s, 3H), 2.06 (m, 1H), 2.03 (s, 3H), 2.02 (s, 6H), 1.99 (s, 3H), 1.36 (d,  $J$  = 3.6 Hz, 3H-1<sub>Ala</sub>), 1.18 (d,  $J$  = 6.6 Hz, 3H<sub>Fuc</sub>), 1.5 (d,  $J$  = 6.6 Hz, 3H<sub>Thr</sub>), 0.94 (d,  $J$  = 6.9 Hz, 6H<sub>Val</sub>); <sup>13</sup>C NMR (151 MHz, D<sub>2</sub>O):  $\delta$  = 175.5, 175.4, 175.3, 175.2, 174.9, 173.8, 173.0, 172.7, 103.7, 103.6(6), 102.4, 101.8, 101.2, 100.4, 100.3, 100.2(6), 100.1, 98.0, 81.1, 80.1, 79.4, 79.2(4), 79.2(1), 79.0, 77.3, 77.2, 76.1, 76.0, 75.5, 75.4, 75.2, 74.3, 73.6, 73.5, 73.3, 73.0, 72.7, 72.6, 72.3, 71.7, 71.2, 71.0, 70.4, 70.3, 70.2, 69.3, 68.9, 68.7, 68.3, 68.1, 67.6, 67.3, 66.4, 66.0, 62.5, 61.8, 61.4, 60.9, 60.7, 60.6, 59.9, 55.9, 55.7, 54.8, 54.4, 52.1, 50.8, 50.3, 40.8, 40.0, 37.1, 34.5, 32.6, 31.3, 31.2(8), 30.9, 27.5, 27.1, 23.3, 23.2, 23.0, 22.9, 22.6, 20.1, 19.3, 18.6, 17.5, 16.2; MALDI-TOF MS: [M+H<sup>+</sup>] C110H189N14O68, calcd 2793, found 2794.

#### **GlcNAc $\beta$ 3Gal $\beta$ 4GlcNAc $\beta$ 2(GlcNAc $\beta$ 3Gal $\beta$ 4GlcNAc $\beta$ 6)Man $\alpha$ 6(GlcNAc $\beta$ 3Gal $\beta$ 4GlcNAc $\beta$ 2Man $\alpha$ 3)Man $\beta$ 4GlcNAc $\beta$ 4(Fuc $\alpha$ 6)GlcNAc $\beta$ -(KVA)NKT (10b)**

This compound was made by the same method used in the preparation of **53b**. Started from 8.4 mg **10a**, 90% yield; <sup>1</sup>H NMR (600 MHz, D<sub>2</sub>O):  $\delta$  = 5.11 (s, 1H, H-1<sub>Man</sub>), 5.03 (d,  $J$  = 9.5 Hz, 1H, H-1<sub>Gn</sub>), 4.86 (d,  $J$  = 3.0 Hz, 1H, H-1<sub>Fuc</sub>), 4.84 (s, 1H, H-1<sub>Man</sub>), 4.75 (s, 1H, H-1<sub>Man</sub>), 4.66 (d,  $J$  = 8.0 Hz, 5H, 4H-1<sub>Gn</sub>, H-1<sub>Asn</sub>), 4.62 – 4.54 (m, 2H, H-1<sub>Gn</sub>), 4.52 (d,  $J$  = 7.9 Hz, 1H, H-1<sub>Gn</sub>), 4.47–4.41 (m, 3H, H-1<sub>Gal</sub>), 4.38 (m, 1H, H-1<sub>Lys</sub>), 4.28 (m, 1H, H-1<sub>Ala</sub>), 4.23 (s, 1H, H-2<sub>Man</sub>), 4.20 (m, 1H, H-2<sub>Thr</sub>), 4.18 (s, 1H, H-2<sub>Man</sub>), 4.15 – 4.07 (m, 5H, 3 H-4<sub>Gal</sub>, H-1<sub>Thr</sub>, H-1<sub>Val</sub>), 4.06 (s, 1H, H-2<sub>Man</sub>), 4.02 – 3.28 (m, 85H), 3.03 – 2.88 (m, 4H, H-5<sub>Lys</sub>), 2.83 (m, 1H, H-2<sub>Asn</sub>), 2.75 (m, 1H, H-2<sub>Asn</sub>), 2.07 (s, 3H), 2.03 (s, 3H), 2.02 (s, 15H), 1.99 (s, 3H), 1.35 (d,  $J$  = 7.0 Hz, 3H<sub>Ala</sub>), 1.18 (d,  $J$  = 6.4 Hz, 3H<sub>Fuc</sub>), 1.15 (d,  $J$  = 6.3 Hz, 3H<sub>Thr</sub>), 0.94 (d,  $J$  = 6.7 Hz, 6H<sub>Val</sub>); <sup>13</sup>C NMR (150 MHz, D<sub>2</sub>O):  $\delta$  = 175.7, 175.5, 175.3, 174.9, 173.8, 103.7, 103.7, 102.4, 101.8, 101.2, 100.4, 100.3, 100.1, 98.0, 82.8, 81.0, 80.1, 79.4, 79.2, 79.0, 77.4, 77.2, 76.4, 76.0, 75.7, 75.5, 75.2, 74.3, 73.6, 73.0, 72.7, 72.6, 72.3, 71.1, 71.0, 70.8, 70.4, 70.3, 70.2, 69.1, 68.9, 68.7, 68.3, 68.1, 67.6, 67.3, 66.4, 66.0, 62.5, 61.7, 61.4, 61.2, 60.9, 60.7, 59.9, 56.4, 55.8, 55.7, 55.6, 54.9, 54.4, 52.1, 50.8, 50.3, 40.0, 37.1, 34.6, 31.4, 30.9, 27.7, 27.3, 23.3, 23.2, 23.0, 22.7, 20.1, 19.3, 18.6, 17.5, 16.3; MALDI-TOF MS: [M+H<sup>+</sup>] C134H229N17O83, calcd 3403, found 3403; MALDI-TOF MS: [M-Lys+H<sup>+</sup>] C128H216N15O82, calcd 3274, found 3275; MALDI-TOF MS: [M-LysValAla+H<sup>+</sup>] C120H203N13O80, calcd 3105, found 3105.

#### **Gal $\beta$ 4GlcNAc $\beta$ 3Gal $\beta$ 4GlcNAc $\beta$ 2(Gal $\beta$ 4GlcNAc $\beta$ 3Gal $\beta$ 4GlcNAc $\beta$ 6)Man $\alpha$ 6(Gal $\beta$ 4GlcNAc $\beta$ 3Gal $\beta$ 4GlcNAc $\beta$ 2Man $\alpha$ 3)Man $\beta$ 4GlcNAc $\beta$ 4(Fuc $\alpha$ 6)GlcNAc $\beta$ -(KVA)NKT (65a)**

This compound was made by the same method used in the preparation of **56a**. Started from 9.2 mg **10b**, 90% yield; <sup>1</sup>H NMR (600 MHz, D<sub>2</sub>O):  $\delta$  = 5.11 (s, 1H, H-1<sub>Man</sub>), 5.03 (d,  $J$  = 9.3 Hz, 1H, H-1<sub>Gn</sub>), 4.86 (d,  $J$  = 3.0 Hz, 1H, H-1<sub>Fuc</sub>), 4.85 (s, 1H, H-1<sub>Man</sub>), 4.75 (s, 1H, H-1<sub>Man</sub>), 4.71 – 4.64 (m, 5H, 4H-1<sub>Gn</sub>, H-1<sub>Asn</sub>), 4.61 – 4.54 (m, 2H, H-1<sub>Gn</sub>), 4.52 (d,  $J$  = 7.7 Hz, 1H, H-1<sub>Gn</sub>), 4.49 – 4.41 (m, 6H), 4.38 (m, 1H, H-1<sub>Lys</sub>), 4.28 (m, 1H, H-1<sub>Ala</sub>), 4.23 (s, 1H, H-2<sub>Man</sub>), 4.20 (m, 1H), 4.18 (s, 1H, H-2<sub>Man</sub>), 4.16 – 4.07 (m, 5H), 4.06 (s, 1H, H-2<sub>Man</sub>), 4.00 – 3.33 (m, 101H), 2.07 (s, 3H), 2.03 (s, 3H), 2.02 (s, 15H), 1.99 (s, 3H), 1.36 (d,  $J$  = 6.8 Hz, 3H<sub>Ala</sub>), 1.18 (d,  $J$  = 6.2 Hz, 3H<sub>Fuc</sub>), 1.15 (d,  $J$  = 6.3 Hz, 3H<sub>Thr</sub>), 0.94 (d,  $J$  = 6.6 Hz, 6H<sub>Val</sub>); <sup>13</sup>C NMR (150 MHz, D<sub>2</sub>O):  $\delta$  = 175.7, 175.5, 175.3, 174.9, 173.8, 103.8, 103.6, 103.5(6), 102.4, 101.8, 101.2, 100.4, 100.3, 100.1, 98.0, 82.9, 82.8, 81.0, 80.1, 79.4, 79.2, 78.9, 77.4, 77.2, 76.1, 76.0, 75.7, 75.5, 75.3, 75.2, 74.3, 73.6, 73.3, 73.0, 72.7, 72.6, 72.3, 71.7, 71.1, 71.0, 70.7, 70.3, 70.2, 69.3, 69.1, 68.9, 68.7, 68.3, 68.1, 67.6, 67.3, 66.4, 65.9, 62.5, 61.8, 61.7, 61.4, 60.9, 60.7, 60.6, 59.9, 56.0, 55.8, 55.7, 55.6, 54.9, 54.4, 52.1, 50.8, 50.3, 40.0, 37.1, 34.5, 32.7, 31.3, 30.9, 27.5, 27.1, 23.3, 23.2, 23.0, 22.6, 20.1, 19.3, 18.6, 17.5, 16.2; MALDI-TOF MS  $m/z$  calcd for

C152H259N17O98 [M+H<sup>+</sup>] 3889, found 3891; MALDI-TOF MS *m/z* calcd for C138H232N13O95Na [M-Lys-Val-Ala+Na<sup>+</sup>] 3613, found 3615.

**Neu5Ac $\alpha$ 3Gal $\beta$ 4GlcNAc $\beta$ 3Gal $\beta$ 4GlcNAc $\beta$ 2(Neu5Ac $\alpha$ 3Gal $\beta$ 4GlcNAc $\beta$ 3Gal $\beta$ 4GlcNAc $\beta$ 6)Man $\alpha$ 6(Neu5Ac $\alpha$ 3Gal $\beta$ 4GlcNAc $\beta$ 3Gal $\beta$ 4GlcNAc $\beta$ 2Man $\alpha$ 3)Man $\beta$ 4GlcNAc $\beta$ 4(Fuc $\alpha$ 6)GlcNAc $\beta$ -(KVA)NKT (65)**

Compound **65a** (0.5 mg, 0.129  $\mu$ mol), CMP-Neu5Ac (0.5 mg, 6.0 equiv.), and rST3Gal-III (2 mU) were dissolved in 129  $\mu$ L buffer (50 mM Tris-HCl, pH 7.5, with 100 mU/mL of calf intestine alkaline phosphatase). After incubation overnight at 37°C, the insoluble precipitates were removed by centrifugation and the supernatant was concentrated and purified by Sephadex<sup>TM</sup> G-25 and lyophilized to give the final product as a white powder (0.5 mg, 81 % yield); MALDI-TOF MS: permethylated [M-LysValAlaAsnLysThr+Na<sup>+</sup>] C227H397N11O114Na, calcd 5122, found 5124.9.

**Neu5Ac $\alpha$ 6Gal $\beta$ 4GlcNAc $\beta$ 3Gal $\beta$ 4GlcNAc $\beta$ 2(Neu5Ac $\alpha$ 6Gal $\beta$ 4GlcNAc $\beta$ 3Gal $\beta$ 4GlcNAc $\beta$ 6)Man $\alpha$ 6(Neu5Ac $\alpha$ 6Gal $\beta$ 4GlcNAc $\beta$ 3Gal $\beta$ 4GlcNAc $\beta$ 2Man $\alpha$ 3)Man $\beta$ 4GlcNAc $\beta$ 4(Fuc $\alpha$ 6)GlcNAc $\beta$ -(KVA)NKT (129)**

Compound **65a** (0.5 mg, 0.129  $\mu$ mol), CMP-Neu5Ac (0.5 mg, 6.0 equiv.), and hST6Gal-I (2 mU) were dissolved in 129  $\mu$ L buffer (50 mM Tris-HCl, pH 7.5, with 100 mU/mL of calf intestine alkaline phosphatase). After incubation overnight at 37°C, the insoluble precipitates were removed by centrifugation and the supernatant was concentrated and purified by Sephadex<sup>TM</sup> G-25 and lyophilized to give the final product as a white powder (0.5 mg, 81 % yield); MALDI-TOF MS: permethylated [M-LysValAlaAsnLysThr+Na<sup>+</sup>] C227H397N11O114Na, calcd 5122, found 5125.

**GlcNAc $\beta$ 3Gal $\beta$ 4GlcNAc $\beta$ 3Gal $\beta$ 4GlcNAc $\beta$ 2(GlcNAc $\beta$ 3Gal $\beta$ 4GlcNAc $\beta$ 3Gal $\beta$ 4GlcNAc $\beta$ 6)Man $\alpha$ 6(GlcNAc $\beta$ 3Gal $\beta$ 4GlcNAc $\beta$ 3Gal $\beta$ 4GlcNAc $\beta$ 2Man $\alpha$ 3)Man $\beta$ 4GlcNAc $\beta$ 4(Fuc $\alpha$ 6)GlcNAc $\beta$ -(KVA)NKT (65b)**

This compound was made by the same method used in the preparation of **53b**. Started from 7.0 mg **65a**, 93% yield; <sup>1</sup>H NMR (600 MHz, D<sub>2</sub>O):  $\delta$  = 5.11 (s, 1H, H-1<sub>Man</sub>), 5.03 (d, *J* = 9.3 Hz, 1H, H-1<sub>Gn</sub>), 4.86 (d, *J* = 3.0 Hz, 1H, H-1<sub>Fuc</sub>), 4.85 (s, 1H, H-1<sub>Man</sub>), 4.75 (s, 1H, H-1<sub>Man</sub>), 4.72-4.63 (m, 8H, 7 H-1<sub>Gn</sub>, H-1<sub>Asn</sub>), 4.62-4.54 (m, 2H, H-1<sub>Gn</sub>), 4.52 (d, *J* = 7.6 Hz, 1H, H-1<sub>Gn</sub>), 4.50-4.41 (m, 6H, H-1<sub>Gal</sub>), 4.41-4.36 (m, 1H, H-1<sub>Lys</sub>), 4.31-4.26 (m, 1H, H-1<sub>Ala</sub>), 4.23 (s, 1H, H-2<sub>Man</sub>), 4.21-4.18 (m, 1H, H-2<sub>Thr</sub>), 4.18 (s, 1H, H-2<sub>Man</sub>), 4.16-4.05 (m, 8H, 6 H-4<sub>Gal</sub>, H-1<sub>Thr</sub>, H-1<sub>Val</sub>), 4.06 (s, 1H, H-2<sub>Man</sub>), 4.00 – 3.37 (m, 116H), 2.07 (s, 3H), 2.04 (s, 3H), 2.02 (s, 24H), 1.99 (s, 3H), 1.36 (d, *J* = 6.8 Hz, 3H<sub>Ala</sub>), 1.18 (d, *J* = 6.3 Hz, 3H<sub>Fuc</sub>), 1.15 (d, *J* = 6.3 Hz, 3H<sub>Thr</sub>), 0.95 (d, *J* = 6.7 Hz, 6H<sub>Val</sub>); <sup>13</sup>C NMR (150 MHz, D<sub>2</sub>O):  $\delta$  = 175.7, 175.5, 173.8, 103.7, 103.6, 102.4, 101.8, 101.2, 100.4, 100.3, 100.1, 98.0, 82.9, 82.8, 81.0, 80.1, 79.4, 79.2, 78.9, 77.2, 76.4, 76.0, 75.7, 75.5, 75.3, 75.2, 74.3, 73.6, 73.0, 72.7, 72.6, 72.3, 71.0, 70.8, 70.4, 70.3, 70.2, 69.1, 68.9, 68.7, 68.3, 68.1, 67.6, 67.3, 66.4, 62.5, 61.7, 61.4, 61.2, 60.7, 60.6, 60.0, 56.4, 55.9, 55.8, 55.6, 54.8, 54.4, 52.1, 50.8, 50.3, 40.0, 37.1, 34.4, 31.3, 30.9, 27.4, 27.0, 23.3, 23.2, 23.0, 22.9, 22.6, 20.1, 19.3, 18.6, 17.5, 16.3; MALDI-TOF MS *m/z* calcd for C176H298N20O113 [M+H<sup>+</sup>] 4498, found 4501; MALDI-TOF MS: [M-Lys+H<sup>+</sup>] C170H286N18O112, calcd 4370, found 4373; MALDI-TOF MS: [M-Lys-Val-Ala+H<sup>+</sup>] C162H272N16O110, calcd 4200, found 4203.

**Gal $\beta$ 4GlcNAc $\beta$ 3Gal $\beta$ 4GlcNAc $\beta$ 3Gal $\beta$ 4GlcNAc $\beta$ 2(Gal $\beta$ 4GlcNAc $\beta$ 3Gal $\beta$ 4GlcNAc $\beta$ 3Gal $\beta$ 4GlcNAc $\beta$ 6)Man $\alpha$ 6(Gal $\beta$ 4GlcNAc $\beta$ 3Gal $\beta$ 4GlcNAc $\beta$ 3Gal $\beta$ 4GlcNAc $\beta$ 2Man $\alpha$ 3)Man $\beta$ 4GlcNAc $\beta$ 4(Fuc $\alpha$ 6)GlcNAc $\beta$ -(KVA)NKT (66a)**

This compound was made by the same method used in the preparation of **56a**. Started from 7.4 mg **65b**, 96% yield; <sup>1</sup>H NMR (600 MHz, D<sub>2</sub>O):  $\delta$  = 5.11 (s, 1H, H-1<sub>Man</sub>), 5.03 (d, *J* = 9.0 Hz, 1H, H-1<sub>Gn</sub>), 4.86 (s, 1H, H-1<sub>Fuc</sub>), 4.85 (s, 1H, H-1<sub>Man</sub>), 4.75 (s, 1H, H-1<sub>Man</sub>), 4.73-4.64 (m, 8H, 7 H-1<sub>Gn</sub>, H-1<sub>Asn</sub>), 4.63-4.54 (m, 2H, H-1<sub>Gn</sub>), 4.52 (d, *J* = 7.1 Hz, 1H, H-1<sub>Gn</sub>), 4.50-4.41 (m, 9H-1<sub>Gal</sub>), 4.41-4.35 (m, 1H, H-1<sub>Lys</sub>), 4.32 – 4.26 (m, 1H, H-1<sub>Ala</sub>), 4.23 (s, 1H, H-2<sub>Man</sub>), 4.21-4.18 (m, 1H, H-2<sub>Thr</sub>), 4.17 (s, 1H, H-2<sub>Man</sub>), 4.17-4.07 (m, 8H, 6 H-4<sub>Gal</sub>, H-1<sub>Thr</sub>, H-1<sub>Val</sub>), 4.06 (s, 1H, H-2<sub>Man</sub>), 4.02 – 3.44 (m, 134H), 2.07 (s, 3H), 2.03 (s, 3H), 2.01 (s, 24H), 1.99 (s, 3H), 1.35 (d, *J* = 6.5 Hz, 3H<sub>Ala</sub>), 1.18 (d, *J* = 5.9 Hz, 3H<sub>Fuc</sub>), 1.15 (d, *J* = 6.2 Hz, 3H<sub>Thr</sub>), 0.94 (d, *J* = 6.5 Hz, 6H<sub>Val</sub>); MALDI-TOF MS: [M+H<sup>+</sup>] C194H327N20O128, calcd 4983, found 4987; MALDI-TOF MS: [M-Lys+H<sup>+</sup>] C188H315N18O127, calcd 4855, found 4857; MALDI-TOF MS: [M-Lys-Thr+H<sup>+</sup>] C184H308N17O125, calcd 4754, found 4757; MALDI-TOF MS: [M-Lys-Val-Ala+H<sup>+</sup>] C180H301N16O125, calcd 4685, found 4689.

**Neu5Ac $\alpha$ 3Gal $\beta$ 4GlcNAc $\beta$ 3Gal $\beta$ 4GlcNAc $\beta$ 3Gal $\beta$ 4GlcNAc $\beta$ 2(Neu5Ac $\alpha$ 3Gal $\beta$ 4GlcNAc $\beta$ 3Gal $\beta$ 4GlcNAc $\beta$ 3Gal $\beta$ 4GlcNAc $\beta$ 6)Man $\alpha$ 6(Neu5Ac $\alpha$ 3Gal $\beta$ 4GlcNAc $\beta$ 3Gal $\beta$ 4GlcNAc $\beta$ 3Gal $\beta$ 4GlcNAc $\beta$ 2Man $\alpha$ 3)Man $\beta$ 4GlcNAc $\beta$ 4(Fuc $\alpha$ 6)GlcNAc $\beta$ -(KVA)NKT (66)**

Compound **66a** (0.5 mg, 0.1  $\mu$ mol), CMP-Neu5Ac (0.4 mg, 6.0 equiv.), and rST3Gal-III (1 mU) were dissolved in 100  $\mu$ L buffer (50 mM Tris-HCl, pH 7.5, with 100 mU/mL of calf intestine alkaline phosphatase). After incubation overnight at 37°C, the insoluble precipitates were removed by centrifugation and the supernatant was concentrated and purified by Sephadex<sup>TM</sup> G-25 and lyophilized to give the final product as a white powder (0.5 mg, 86 % yield); MALDI-TOF MS: permethylated [M-LysValAlaAsnLysThr+Na<sup>+</sup>] C287H502N14O144Na, calcd 6469, found 6474.9.

**Neu5Ac $\alpha$ 6Gal $\beta$ 4GlcNAc $\beta$ 3Gal $\beta$ 4GlcNAc $\beta$ 3Gal $\beta$ 4GlcNAc $\beta$ 2(Neu5Ac $\alpha$ 6Gal $\beta$ 4GlcNAc $\beta$ 3Gal $\beta$ 4GlcNAc $\beta$ 3Gal $\beta$ 4GlcNAc $\beta$ 6)Man $\alpha$ 6(Neu5Ac $\alpha$ 6Gal $\beta$ 4GlcNAc $\beta$ 3Gal $\beta$ 4GlcNAc $\beta$ 3Gal $\beta$ 4GlcNAc $\beta$ 2Man $\alpha$ 3)Man $\beta$ 4GlcNAc $\beta$ 4(Fuc $\alpha$ 6)GlcNAc $\beta$ -(KVA)NKT (130)**

Compound **66a** (0.5 mg, 0.1  $\mu$ mol), CMP-Neu5Ac (0.4 mg, 6.0 equiv.), and hST6Gal-I (1 mU) were dissolved in 100  $\mu$ L buffer (50 mM Tris-HCl, pH 7.5, with 100 mU/mL of calf intestine alkaline phosphatase). After incubation overnight at 37°C, the insoluble precipitates were removed by centrifugation and the supernatant was concentrated and purified by Sephadex<sup>TM</sup> G-25 and lyophilized to give the final product as a white powder (0.5 mg, 86 % yield); MALDI-TOF MS: permethylated [M-LysValAlaAsnLysThr+Na<sup>+</sup>] C287H502N14O144Na, calcd 6469, found 6475.

**GlcNAc $\beta$ 3Gal $\beta$ 4GlcNAc $\beta$ 3Gal $\beta$ 4GlcNAc $\beta$ 3Gal $\beta$ 4GlcNAc $\beta$ 2(GlcNAc $\beta$ 3Gal $\beta$ 4GlcNAc $\beta$ 3Gal $\beta$ 4GlcNAc $\beta$ 3Gal $\beta$ 4GlcNAc $\beta$ 6)Man $\alpha$ 6(GlcNAc $\beta$ 3Gal $\beta$ 4GlcNAc $\beta$ 3Gal $\beta$ 4GlcNAc $\beta$ 3Gal $\beta$ 4GlcNAc $\beta$ 2Man $\alpha$ 3)Man $\beta$ 4GlcNAc $\beta$ 4(Fuc $\alpha$ 6)GlcNAc $\beta$ -(KVA)NKT (66b)**

This compound was made by the same method used in the preparation of **53b**. Started from 4 mg **66a**, 93% yield; <sup>1</sup>H NMR (600 MHz, D<sub>2</sub>O):  $\delta$  = 5.11 (s, 1H, H-1<sub>Man</sub>), 5.03 (d,  $J$  = 8.8 Hz, 1H, H-1<sub>Gn</sub>), 4.86 (s, 1H, H-1<sub>Fuc</sub>), 4.85 (s, 1H, H-1<sub>Man</sub>), 4.75 (s, 1H, H-1<sub>Man</sub>), 4.73-4.64 (m, 11H, 10 H-1<sub>Gn</sub>, H-1<sub>Asn</sub>), 4.63-4.55 (m, 2H, H-1<sub>Gn</sub>), 4.52 (d,  $J$  = 6.8 Hz, 1H, H-1<sub>Gn</sub>), 4.50-4.42 (m, 9H-1<sub>Gal</sub>), 4.41-4.36(m, 1H, H-1<sub>Lys</sub>), 4.33-4.25 (m, 1H, H-1<sub>Ala</sub>), 4.23 (s, 1H, H-2<sub>Man</sub>), 4.22-4.20 (m, 1H, H-2<sub>Thr</sub>), 4.18 (s, 1H, H-2<sub>Man</sub>), 4.17-4.08 (m, 11H, 9H-4<sub>Gal</sub>, H-1<sub>Thr</sub>, H-1<sub>Val</sub>), 4.06 (s, 1H, H-2<sub>Man</sub>), 4.00 – 3.36 (m, 149H), 2.07 (s, 3H), 2.03 (s, 3H), 2.02 (s, 33H), 1.99 (s, 3H), 1.36 (d,  $J$  = 6.6 Hz, 3H<sub>Ala</sub>), 1.18 (d,  $J$  = 6.0 Hz, 3H<sub>Fuc</sub>), 1.15 (d,  $J$  = 6.2 Hz, 3H<sub>Thr</sub>), 0.95 (d,  $J$  = 6.5 Hz, 6H<sub>Val</sub>); <sup>13</sup>C NMR (151 MHz, D<sub>2</sub>O):  $\delta$  = 177.2, 175.7, 175.6(8), 173.8, 103.7, 103.6(6), 103.5(5), 102.4, 101.8, 101.2, 100.4, 100.3, 100.1, 98.0, 82.8, 82.7(7), 81.0, 80.1, 79.2, 78.9, 77.2, 76.4, 76.0, 75.7, 75.5, 75.3, 74.3, 73.6, 73.0, 72.7, 72.6, 70.8, 70.7, 70.4, 70.3, 70.2, 69.1, 68.9, 68.7, 68.1, 67.6, 67.3, 66.5, 62.5, 61.7, 61.4, 61.2, 60.6, 59.9, 56.4, 55.9, 55.6, 54.9, 54.4, 52.1, 50.8, 50.3, 40.0, 39.9(7), 37.1, 34.5, 32.7, 31.3, 30.9, 27.5, 27.1, 23.3, 23.2, 23.0, 22.7, 22.6, 20.8, 20.2, 20.1, 19.3, 18.6, 17.5, 16.2; MALDI-TOF MS: [M+H<sup>+</sup>] C218H366N23O143, calcd 5592, found 5597.

**Gal $\beta$ 4GlcNAc $\beta$ 3Gal $\beta$ 4GlcNAc $\beta$ 3Gal $\beta$ 4GlcNAc $\beta$ 3Gal $\beta$ 4GlcNAc $\beta$ 2(Gal $\beta$ 4GlcNAc $\beta$ 3Gal $\beta$ 4GlcNAc $\beta$ 3Gal $\beta$ 4GlcNAc $\beta$ 3Gal $\beta$ 4GlcNAc $\beta$ 6)Man $\alpha$ 6(Gal $\beta$ 4GlcNAc $\beta$ 3Gal $\beta$ 4GlcNAc $\beta$ 3Gal $\beta$ 4GlcNAc $\beta$ 3Gal $\beta$ 4GlcNAc $\beta$ 2Man $\alpha$ 3)Man $\beta$ 4GlcNAc $\beta$ 4(Fuc $\alpha$ 6)GlcNAc $\beta$ -(KVA)NKT (67a)**

This compound was made by the same method used in the preparation of **56a**. Started from 4.2 mg **66b**, 97% yield; <sup>1</sup>H NMR (600 MHz, D<sub>2</sub>O):  $\delta$  = 5.11 (s, 1H, H-1<sub>Man</sub>), 5.03 (d,  $J$  = 9.3 Hz, 1H, H-1<sub>Gn</sub>), 4.86 (s, 1H, H-1<sub>Fuc</sub>), 4.85 (s, 1H, H-1<sub>Man</sub>), 4.75 (s, 1H, H-1<sub>Man</sub>), 4.72-4.63 (m, 10H-1<sub>Gn</sub>, H-1<sub>Asn</sub>), 4.60-4.54 (m, 2H-1<sub>Gn</sub>), 4.53 (d,  $J$  = 6.6 Hz, 1H-1<sub>Gn</sub>), 4.50-4.41 (m, 12H-1<sub>Gal</sub>), 4.40 – 4.36 (m, 1H, H-1<sub>Lys</sub>), 4.32 – 4.26 (m, 1H, H-1<sub>Ala</sub>), 4.24 (s, 1H, H-2<sub>Man</sub>), 4.22 – 4.19 (m, 1H, H-2<sub>Thr</sub>), 4.18 (s, 1H, H-2<sub>Man</sub>), 4.18 – 4.08 (m, 9H-4<sub>Gal</sub>, H-1<sub>Thr</sub>, H-1<sub>Val</sub>), 4.06 (s, 1H, H-2<sub>Man</sub>), 4.02 – 3.38 (m, 167H), 2.07 (s, 3H), 2.04 (s, 3H), 2.02 (s, 33H), 1.99 (s, 3H), 1.36 (d,  $J$  = 7.2 Hz, 3H<sub>Ala</sub>), 1.19 (d,  $J$  = 6.4 Hz, 3H<sub>Fuc</sub>), 1.15 (d,  $J$  = 6.4 Hz, 3H<sub>Thr</sub>), 0.95 (d,  $J$  = 6.8 Hz, 6H<sub>Val</sub>); MALDI-TOF MS: [M+H<sup>+</sup>] C236H396N23O158, calcd 6078, found 6082.

**Neu5Ac $\alpha$ 3Gal $\beta$ 4GlcNAc $\beta$ 3Gal $\beta$ 4GlcNAc $\beta$ 3Gal $\beta$ 4GlcNAc $\beta$ 3Gal $\beta$ 4GlcNAc $\beta$ 2(Neu5Ac $\alpha$ 3Gal $\beta$ 4GlcNAc $\beta$ 3Gal $\beta$ 4GlcNAc $\beta$ 3Gal $\beta$ 4GlcNAc $\beta$ 6)Man $\alpha$ 6(Neu5Ac $\alpha$ 3Gal $\beta$ 4GlcNAc $\beta$ 3Gal $\beta$ 4GlcNAc $\beta$ 3Gal $\beta$ 4GlcNAc $\beta$ 3Gal $\beta$ 4GlcNAc $\beta$ 2Man $\alpha$ 3)Man $\beta$ 4GlcNAc $\beta$ 4(Fuc $\alpha$ 6)GlcNAc $\beta$ -(KVA)NKT (67)**

Compound **67a** (0.5 mg, 0.08  $\mu$ mol), CMP-Neu5Ac (0.4 mg, 6.0 equiv.), and rST3Gal-III (1 mU) were dissolved in 82  $\mu$ L buffer (50 mM Tris-HCl, pH 7.5, with 100 mU/mL of calf intestine alkaline phosphatase). After incubation overnight at 37°C, the insoluble precipitates were removed by centrifugation and the supernatant was concentrated and purified by Sephadex<sup>TM</sup> G-25 and lyophilized to give the final product as a white powder (0.5 mg, 88 % yield); MALDI-TOF MS: permethylated [M-LysValAlaAsnLysThr+Na<sup>+</sup>] C347H607N17O174Na, calcd 7816, found 7822.3.

**Neu5Ac $\alpha$ 6Gal $\beta$ 4GlcNAc $\beta$ 3Gal $\beta$ 4GlcNAc $\beta$ 3Gal $\beta$ 4GlcNAc $\beta$ 3Gal $\beta$ 4GlcNAc $\beta$ 2(Neu5Ac $\alpha$ 6Gal $\beta$ 4GlcNAc $\beta$ 3Gal $\beta$ 4GlcNAc $\beta$ 3Gal $\beta$ 4GlcNAc $\beta$ 3Gal $\beta$ 4GlcNAc $\beta$ 6)Man $\alpha$ 6(Neu5Ac $\alpha$ 6Gal $\beta$ 4GlcNAc $\beta$ 3Gal $\beta$ 4GlcNAc $\beta$ 3Gal $\beta$ 4GlcNAc $\beta$ 3Gal $\beta$ 4GlcNAc $\beta$ 2Man $\alpha$ 3)Man $\beta$ 4GlcNAc $\beta$ 4(Fuc $\alpha$ 6)GlcNAc $\beta$ -(KVA)NKT (131)**

Compound **67a** (0.5 mg, 0.08  $\mu$ mol), CMP-Neu5Ac (0.4 mg, 6.0 equiv.), and hST6Gal-I (1 mU) were dissolved in 82  $\mu$ L buffer (50 mM Tris-HCl, pH 7.5, with 100 mU/mL of calf intestine alkaline phosphatase). After incubation overnight at 37°C, the insoluble precipitates were removed by centrifugation and the supernatant was concentrated and purified by Sephadex<sup>TM</sup> G-25 and lyophilized to give the final product as a white powder (0.5 mg, 88 % yield); MALDI-TOF MS: permethylated [M-LysValAlaAsnLysThr+Na<sup>+</sup>] C347H607N17O174Na, calcd 7816, found 7821.8.

## 5.2 Synthesis of sialoside derivatives

### 5.2.1 Synthesis of biotinylated $\alpha$ 2-6-sialosides used in experiments in Figure 5B.

| Derivatives |               | Sialoside Compounds Number |     |     |     |             |     |     |     |
|-------------|---------------|----------------------------|-----|-----|-----|-------------|-----|-----|-----|
|             |               | Linear                     |     |     |     | Biantennary |     |     |     |
| n =         |               | 1                          | 2   | 3   | 4   | 1           | 2   | 3   | 4   |
| R =         | -LCLC-Biotin  | 136                        | 137 | 138 | 139 | 140         | 141 | 142 | 143 |
|             | -PEG2000-DSPE | 144                        | 145 | 146 | NA  | 147         | 148 | 149 | NA  |

Sialosides (1-10 mg) were mixed with 2 equiv. of EZ-Link<sup>TM</sup> NHS-LCLC-biotin (ThermoFisher Scientific, Cat #: 21343) and 2 equiv. of DIEA in 200  $\mu$ L DMSO. The reactions were stirred at room temperature and monitored by TLC. After the starting materials were consumed, the reactions were loaded on Sephadex<sup>TM</sup> G-25 column. Products were re-purified by HPLC with C18-RP column and eluted with CH<sub>3</sub>CN-H<sub>2</sub>O-TFA. The final yield was between 85-98%.

#### Neu5Ac $\alpha$ 6Gal $\beta$ 4GlcNAc $\beta$ -ethylamine-LCLC-biotin (136)

<sup>1</sup>H NMR (600 MHz, D<sub>2</sub>O):  $\delta$  = 4.61 (dd,  $J$  = 7.9, 4.8 Hz, 1H), 4.55 (d,  $J$  = 8.4 Hz, 1H), 4.44 (d,  $J$  = 7.9 Hz, 1H), 4.42 (dd,  $J$  = 7.9, 4.6 Hz, 1H), 4.04 (dd,  $J$  = 10.3, 9.0 Hz, 1H), 3.97 (d,  $J$  = 10.8 Hz, 1H), 3.94 – 3.79 (m, 8H), 3.77 – 3.59 (m, 9H), 3.57 – 3.50 (m, 2H), 3.37 (t,  $J$  = 5.4 Hz, 2H), 3.35 – 3.30 (m, 1H), 3.22 – 3.13 (m, 4 H), 2.99 (dd,  $J$  = 13.1, 5.1 Hz, 1H), 2.78 (d,  $J$  = 13.1 Hz, 1H), 2.65 (dd,  $J$  = 12.7, 4.6 Hz, 1H), 2.27 – 2.21 (m, 6H), 2.05 (s, 3H), 2.03 (s, 3H), 1.81 (t,  $J$  = 12.3 Hz, 1H), 1.76-1.68 (m, 1H), 1.68 – 1.63 (m, 1H), 1.62-1.55 (m, 6H), 1.54 – 1.48 (m, 4H), 1.45-1.35 (m, 2H), 1.35 – 1.27 (m, 4H); MALDI-TOF MS: [M + Na<sup>+</sup>] C49H83N7O23SNa, calcd 1193, found 1193.

#### Neu5Ac $\alpha$ 6Gal $\beta$ 4GlcNAc $\beta$ 3Gal $\beta$ 4GlcNAc $\beta$ -ethylamine-LCLC-biotin (137)

<sup>1</sup>H NMR (600 MHz, D<sub>2</sub>O):  $\delta$  = 4.72 (d,  $J$  = 7.9 Hz, 1H), 4.61 (dd,  $J$  = 7.9, 5.0 Hz, 1H), 4.53 (d,  $J$  = 8.1 Hz, 1H), 4.46 (dd,  $J$  = 7.9 Hz, 2H), 4.42 (dd,  $J$  = 8.0, 4.5 Hz, 1H), 4.15 (d,  $J$  = 3.5 Hz, 1H), 4.02 (t,  $J$  = 9.6 Hz, 1H), 4.01 – 3.50 (m, 31H), 3.39 – 3.29 (m, 3H), 3.21 – 3.12 (m, 4H), 2.99 (dd,  $J$  = 13.1, 5.1 Hz, 1H), 2.78 (d,  $J$  = 13.1 Hz, 1H), 2.65 (dd,  $J$  = 12.7, 4.7 Hz, 1H), 2.30 – 2.18 (m, 6H), 2.05 (s, 3H), 2.03 (s, 3H), 2.02 (s, 3H), 1.82 (t,  $J$  = 12.3 Hz, 1H), 1.76 – 1.69 (m, 1H), 1.68 – 1.55 (m, 7H), 1.54 – 1.45 (m, 4H), 1.44 – 1.36 (m, 2H), 1.35-1.27 (m, 4H); MALDI-TOF MS: [M + Na<sup>+</sup>] C63H106N8O33SNa, calcd 1558, found 1558.

#### Neu5Ac $\alpha$ 6Gal $\beta$ 4GlcNAc $\beta$ 3Gal $\beta$ 4GlcNAc $\beta$ 3Gal $\beta$ 4GlcNAc $\beta$ -ethylamine-LCLC-biotin (138)

<sup>1</sup>H NMR (600 MHz, D<sub>2</sub>O):  $\delta$  = 4.72 (d,  $J$  = 8.5 Hz, 1H), 4.70 (d,  $J$  = 8.4 Hz, 1H), 4.61 (dd,  $J$  = 7.9, 5.1 Hz, 1H), 4.52 (d,  $J$  = 8.0 Hz, 1H), 4.49 – 4.44 (m, 3H), 4.42 (dd,  $J$  = 8.0, 4.5 Hz, 1H), 4.15 (m, 2H), 4.04 (t,  $J$  = 9.6 Hz, 1H), 4.01 – 3.49 (m, 42H), 3.39 – 3.28 (m, 3H), 3.21 – 3.13 (m, 4H), 2.99 (dd,  $J$  = 13.1, 5.1 Hz, 1H), 2.78 (d,  $J$  = 13.2 Hz, 1H), 2.65 (dd,  $J$  = 12.9, 4.7 Hz, 1H), 2.30 – 2.18 (m, 6H), 2.03 (s, 9H), 2.02 (s, 3H), 1.82 (t,  $J$  = 12.2 Hz, 1H), 1.75-1.68 (m, 1H), 1.68 – 1.54 (m, 7H), 1.5-1.47 (m, 4H), 1.44 – 1.36 (m, 2H), 1.35-1.27 (m, 4H); MALDI-TOF MS: [M + H<sup>+</sup>] C77H130N9O43S, calcd 1901, found 1902.



**Neu5Ac $\alpha$ 6Gal $\beta$ 4GlcNAc $\beta$ 3Gal $\beta$ 4GlcNAc $\beta$ 3Gal $\beta$ 4GlcNAc $\beta$ 3Gal $\beta$ 4GlcNAc $\beta$ -ethylamine-LCLC-biotin (139)**

$^1\text{H}$  NMR (600 MHz,  $\text{D}_2\text{O}$ ):  $\delta$  = 4.72 (d,  $J$  = 7.8 Hz, 1H), 4.70 (d,  $J$  = 8.4 Hz, 2H), 4.61 (dd,  $J$  = 7.9, 5.1 Hz, 1H), 4.53 (d,  $J$  = 7.9 Hz, 1H), 4.49 – 4.44 (m, 4H), 4.42 (dd,  $J$  = 8.0, 4.5 Hz, 1H), 4.18–4.14 (m, 3H), 4.03 (t,  $J$  = 9.7 Hz, 1H), 4.01 – 3.50 (m, 55H), 3.41 – 3.30 (m, 3H), 3.22 – 3.12 (m, 4H), 2.99 (dd,  $J$  = 13.0, 5.0 Hz, 1H), 2.78 (d,  $J$  = 12.9 Hz, 1H), 2.66 (dd,  $J$  = 12.5, 4.6 Hz, 1H), 2.28 – 2.20 (m, 6H), 2.05 (s, 3H), 2.03 (s, 9H), 2.02 (s, 3H), 1.79 (t,  $J$  = 12.2 Hz, 1H), 1.77 – 1.69 (m, 1H), 1.68–1.55 (m, 7H), 1.54–1.48 (m, 4H), 1.45 – 1.36 (m, 2H), 1.35–1.27 (m, 4H); MALDI-TOF MS:  $[\text{M} + \text{H}^+]$  C<sub>91</sub>H<sub>153</sub>N<sub>10</sub>O<sub>53</sub>S, calcd 2266, found 2267.

**Neu5Ac $\alpha$ 6Gal $\beta$ 4GlcNAc $\beta$ 2Man $\alpha$ 3(Neu5Ac $\alpha$ 6Gal $\beta$ 4GlcNAc $\beta$ 2Man $\alpha$ 6)Man $\beta$ 4GlcNAc $\beta$ 4GlcNAc $\beta$ -Asn-LCLC-biotin (140)**

$^1\text{H}$  NMR (600 MHz,  $\text{D}_2\text{O}$ ):  $\delta$  = 5.13 (s, 1H), 5.05 (d,  $J$  = 9.7 Hz, 1H), 4.95 (s, 1H), 4.77 (s, 1H), 4.74 (t,  $J$  = 6.0 Hz, 1H), 4.64 – 4.57 (m, 4H), 4.45 (dd,  $J$  = 7.9, 2.4 Hz, 2H), 4.42 (dd,  $J$  = 7.8, 4.4 Hz, 1H), 4.25 (s, 1H), 4.20 (d,  $J$  = 3.3 Hz, 1H), 4.13 – 4.10 (m, 1H), 4.06 – 4.00 (m, 1H), 4.00 – 3.47 (m, 64H), 3.35–3.31 (m, 1H), 3.21 – 3.12 (m, 4H), 2.99 (dd,  $J$  = 13.0, 5.0 Hz, 1H), 2.84 (d,  $J$  = 6.1 Hz, 2H), 2.78 (d,  $J$  = 12.9 Hz, 1H), 2.68 – 2.61 (m, 2H), 2.29 (t,  $J$  = 7.3 Hz, 2H), 2.24 (dt,  $J$  = 8.9, 7.3 Hz, 4H), 2.08 (s, 3H), 2.07 (s, 3H), 2.06 (s, 3H), 2.03 (s, 6H), 2.00 (s, 3H), 1.81 (t,  $J$  = 12.2 Hz, 2H), 1.76 – 1.68 (m, 1H), 1.68 – 1.55 (m, 7H), 1.55 – 1.46 (m, 4H), 1.43 – 1.36 (m, 2H), 1.35–1.27 (m, 4H); MALDI-TOF MS:  $[\text{M} + \text{H}^+]$  C<sub>110</sub>H<sub>181</sub>N<sub>12</sub>O<sub>68</sub>S, calcd 2790, found 2791.

**Neu5Ac $\alpha$ 6Gal $\beta$ 4GlcNAc $\beta$ 3Gal $\beta$ 4GlcNAc $\beta$ 2Man $\alpha$ 3(Neu5Ac $\alpha$ 6Gal $\beta$ 4GlcNAc $\beta$ 3Gal $\beta$ 4GlcNAc $\beta$ 2Man $\alpha$ 6)Man $\beta$ 4GlcNAc $\beta$ 4GlcNAc $\beta$ / $\alpha$ -Bifunctional linker-LCLC-biotin (141)**

$^1\text{H}$  NMR (600 MHz,  $\text{D}_2\text{O}$ ):  $\delta$  = 5.20 (s, 0.54H, H-1 $\alpha$ ), 5.13 (s, 1H), 4.94 (s, 1H), 4.78–4.7 (m, 3.46H), 4.65–4.56 (m, 4H), 4.49–4.41 (m, 5H), 4.26 (s, 1H), 4.22 – 4.14 (m, 5H), 4.12 (s, 1H), 4.06 – 3.45 (m, 90H), 3.40 – 3.30 (m, 1H), 3.21–3.15 (m, 4H), 3.00 (s, 3H), 2.79 (d,  $J$  = 12.8 Hz, 1H), 2.68 (dd,  $J$  = 12.3, 4.4 Hz, 2H), 2.33 – 2.19 (m, 6H), 2.09 (s, 3H), 2.08–2.02 (m, 18H), 2.00 (s, 3H), 1.76 (t,  $J$  = 11.9 Hz, 2H), 1.76–1.69 (m, 1H), 1.70–1.56 (m, 7H), 1.56–1.48 (m, 4H), 1.45–1.37 (m, 2H), 1.37–1.27 (m, 4H); MALDI-TOF MS:  $[\text{M} + \text{H}^+]$  C<sub>137</sub>H<sub>229</sub>N<sub>14</sub>O<sub>86</sub>S, calcd 3478, found 3479.

**Neu5Ac $\alpha$ 6Gal $\beta$ 4GlcNAc $\beta$ 3Gal $\beta$ 4GlcNAc $\beta$ 3Gal $\beta$ 4GlcNAc $\beta$ 2Man $\alpha$ 3(Neu5Ac $\alpha$ 6Gal $\beta$ 4GlcNAc $\beta$ 3Gal $\beta$ 4GlcNAc $\beta$ 3Gal $\beta$ 4GlcNAc $\beta$ 2Man $\alpha$ 6)Man $\beta$ 4GlcNAc $\beta$ 4GlcNAc $\beta$ -Asn-LCLC-biotin (142)**

$^1\text{H}$  NMR (600 MHz,  $\text{D}_2\text{O}$ ):  $\delta$  = 5.12 (s, 1H), 5.05 (d,  $J$  = 9.7 Hz, 1H), 4.93 (s, 1H), 4.78–4.65 (m, 7H), 4.66 – 4.53 (m, 4H), 4.52–4.41 (m, 8H), 4.26 (s, 1H), 4.19 (s, 1H), 4.17 (s, 4H), 4.11 (s, 1H), 4.04 – 3.46 (m, 107H), 3.34 (dt,  $J$  = 9.4, 5.0 Hz, 1H), 3.18 (dt,  $J$  = 13.4, 6.4 Hz, 4H), 3.00 (dd,  $J$  = 12.9, 4.8 Hz, 1H), 2.86 – 2.76 (m, 3H), 2.68 (dd,  $J$  = 12.2, 4.6 Hz, 2H), 2.29 (t,  $J$  = 7.5 Hz, 2H), 2.27–2.22 (m, 4H), 2.08 (s, 3H), 2.06 (s, 9H), 2.05 (s, 3H), 2.04 (s, 12H), 2.01 (s, 3H), 1.73 (t,  $J$  = 12.2 Hz, 2H), 1.76–1.69 (m, 1H), 1.70 – 1.56 (m, 7H), 1.55–1.47 (m, 4H), 1.46–1.37 (m, 2H), 1.37–1.27 (m, 4H); MALDI-TOF MS:  $[\text{M} + \text{Na}^+]$  C<sub>166</sub>H<sub>272</sub>N<sub>16</sub>O<sub>108</sub>SNa, calcd 4273, found 4276.

**Neu5Ac $\alpha$ 6Gal $\beta$ 4GlcNAc $\beta$ 3Gal $\beta$ 4GlcNAc $\beta$ 3Gal $\beta$ 4GlcNAc $\beta$ 3Gal $\beta$ 4GlcNAc $\beta$ 2Man $\alpha$ 3(Neu5Ac $\alpha$ 6Gal $\beta$ 4GlcNAc $\beta$ 3Gal $\beta$ 4GlcNAc $\beta$ 3Gal $\beta$ 4GlcNAc $\beta$ 3Gal $\beta$ 4GlcNAc $\beta$ 2Man $\alpha$ 6)Man $\beta$ 4GlcNAc $\beta$ 4GlcNAc $\beta$ -Asn-LCLC-biotin (143)**

$^1\text{H}$  NMR (600 MHz,  $\text{D}_2\text{O}$ ):  $\delta$  = 5.12 (s, 1H), 5.05 (d,  $J$  = 9.6 Hz, 1H), 4.93 (s, 1H), 4.76 – 4.65 (m, 8H), 4.65 – 4.53 (m, 4H), 4.51–4.41 (m, 9H), 4.25 (s, 1H), 4.19 (s, 1H), 4.16 (s, 6H), 4.11 (s, 1H), 4.06 – 3.42 (m, 131H), 3.36–3.31 (m, 1H), 3.21–3.14 (m, 4H), 3.00 (dd,  $J$  = 13.0, 5.0 Hz, 1H), 2.84 (d,  $J$  = 5.4 Hz, 2H), 2.78 (d,  $J$  = 13.1 Hz, 1H), 2.67 (dd,  $J$  = 12.5, 4.7 Hz, 2H), 2.29 (t,  $J$  = 7.3 Hz, 2H), 2.28–2.21 (m, 4H), 2.08 (s, 3H), 2.07 – 2.01 (m, 30H), 2.00 (s, 3H), 1.75 (t,  $J$  = 12.2 Hz, 2H), 1.77–1.69 (m, 1H), 1.68–1.57 (m, 7H), 1.56–1.47 (m, 4H), 1.45–1.37 (m, 2H), 1.36–1.28 (m, 4H); MALDI-TOF MS:  $[\text{M} + \text{Na}^+]$  C<sub>194</sub>H<sub>318</sub>N<sub>18</sub>O<sub>128</sub>SNa, calcd 5003, found 5007.

**5.2.2 Synthesis of lipidated  $\alpha$ 2-6-sialosides in Figure 5C (144-149).**

Sialosides (1-10 mg) were mixed with 1.2 equiv. of NHS-PEG2000-DSPE (NOF America Corp., Cat # DSPE-020GS) and 2 equiv. of DIEA in 200  $\mu\text{L}$  DMSO. The reactions were stirred at room temperature and monitored by TLC. After the starting materials were consumed, the reactions were loaded on Sephadex<sup>TM</sup> G-100 column and eluted with H<sub>2</sub>O. The final yield was between 80-90%.

## **6. NMR and MS Spectra**

Available upon request.

## Supplemental References

Case, D.A., Babin, V., Berryman, J.T., Betz, R.M., Cai, Q., Cerutti, D.S., T.E. Cheatham, I., Darden, T.A., Duke, R.E., Gohlke, H., *et al.* (2014a). AMBER 14 (University of California, San Francisco).

Case, D.A., Babin, V., Berryman, J.T., R.M. Betz, Cai, Q., Cerutti, D.S., Cheatham III, T.E., Darden, T.A., Duke, R.E., Gohlke, H., *et al.* (2014b). The FF14SB force field. In AMBER 14 Reference Manual (University of California), pp. 29-31.

Darden, T., York, D., and Pedersen, L. (1993). Particle mesh Ewald: An  $N \log(N)$  method for Ewald sums in large systems. *The Journal of chemical physics* 98, 10089.

Gotz, A.W., Williamson, M.J., Xu, D., Poole, D., Le Grand, S., and Walker, R.C. (2012). Routine Microsecond Molecular Dynamics Simulations with AMBER on GPUs. 1. Generalized Born. *J Chem Theory Comput* 8, 1542-1555.

Ihara, H., Ikeda, Y., and Taniguchi, N. (2006). Reaction mechanism and substrate specificity for nucleotide sugar of mammalian alpha1,6-fucosyltransferase--a large-scale preparation and characterization of recombinant human FUT8. *Glycobiology* 16, 333-342.

Kirschner, K.N., Yongye, A.B., Tschampel, S.M., Gonzalez-Outeirino, J., Daniels, C.R., Foley, B.L., and Woods, R.J. (2008). GLYCAM06: a generalizable biomolecular force field. *Carbohydrates. J Comput Chem* 29, 622-655.

Nycholat, C.M., McBride, R., Ekiert, D.C., Xu, R., Rangarajan, J., Peng, W., Razi, N., Gilbert, M., Wakarchuk, W., Wilson, I.A., *et al.* (2012). Recognition of sialylated poly-N-acetyllactosamine chains on N- and O-linked glycans by human and avian influenza A virus hemagglutinins. *Angew Chem Int Ed Engl* 51, 4860-4863.

Nycholat, C.M., Peng, W., McBride, R., Antonopoulos, A., de Vries, R.P., Polonskaya, Z., Finn, M.G., Dell, A., Haslam, S.M., and Paulson, J.C. (2013). Synthesis of biologically active N- and O-linked glycans with multisialylated poly-N-acetyllactosamine extensions using *P. damsela* alpha2-6 sialyltransferase. *J Am Chem Soc* 135, 18280-18283.

Peng, W., Pranskevich, J., Nycholat, C., Gilbert, M., Wakarchuk, W., Paulson, J.C., and Razi, N. (2012). *Helicobacter pylori* beta1,3-N-acetylglucosaminyltransferase for versatile synthesis of type 1 and type 2 poly-LacNAcs on N-linked, O-linked and I-antigen glycans. *Glycobiology* 22, 1453-1464.

Ryckaert, J.-P., Ciccotti, G., and Berendsen, H.J.C. (1977). Numerical integration of the Cartesian Equations of Motion of a System with Constraints: Molecular Dynamics of n-Alkanes. *Journal of Computational Physics* 23, 327-341.

Salomon-Ferrer, R., Götz, A.W., Poole, D., Le Grand, S., and Walker, R.C. (2013). Routine Microsecond Molecular Dynamics Simulations with AMBER on GPUs. 2. Explicit Solvent Particle Mesh Ewald. *Journal of Chemical Theory and Computation* 9, 3878-3888.

Tzarum, N., de Vries, R.P., Zhu, X., Yu, W., McBride, R., Paulson, J.C., and Wilson, I.A. (2015). Structure and receptor binding of the hemagglutinin from a human H6N1 influenza virus. *Cell Host Microbe* 17, 369-376.

Wang, Z., Chinoy, Z.S., Ambre, S.G., Peng, W., McBride, R., de Vries, R.P., Glushka, J., Paulson, J.C., and Boons, G.J. (2013). A general strategy for the chemoenzymatic synthesis of asymmetrically branched N-glycans. *Science* 341, 379-383.
